# Supplementary material
Source: PubMed Central journal article supplement (PMC7858064)
Supplement: mBio.03188-20-sd003.pdf [file mBio.03188-20-sd003.pdf]

**Country**

- United Kingdom
- United States
- Australia

**pMHMC\_004 coverage**

- 0%
- 100%

**pMHMC\_004 presence**

- pMHMC\_004 presence

**pKSR100 presence**

- pKSR100 presence

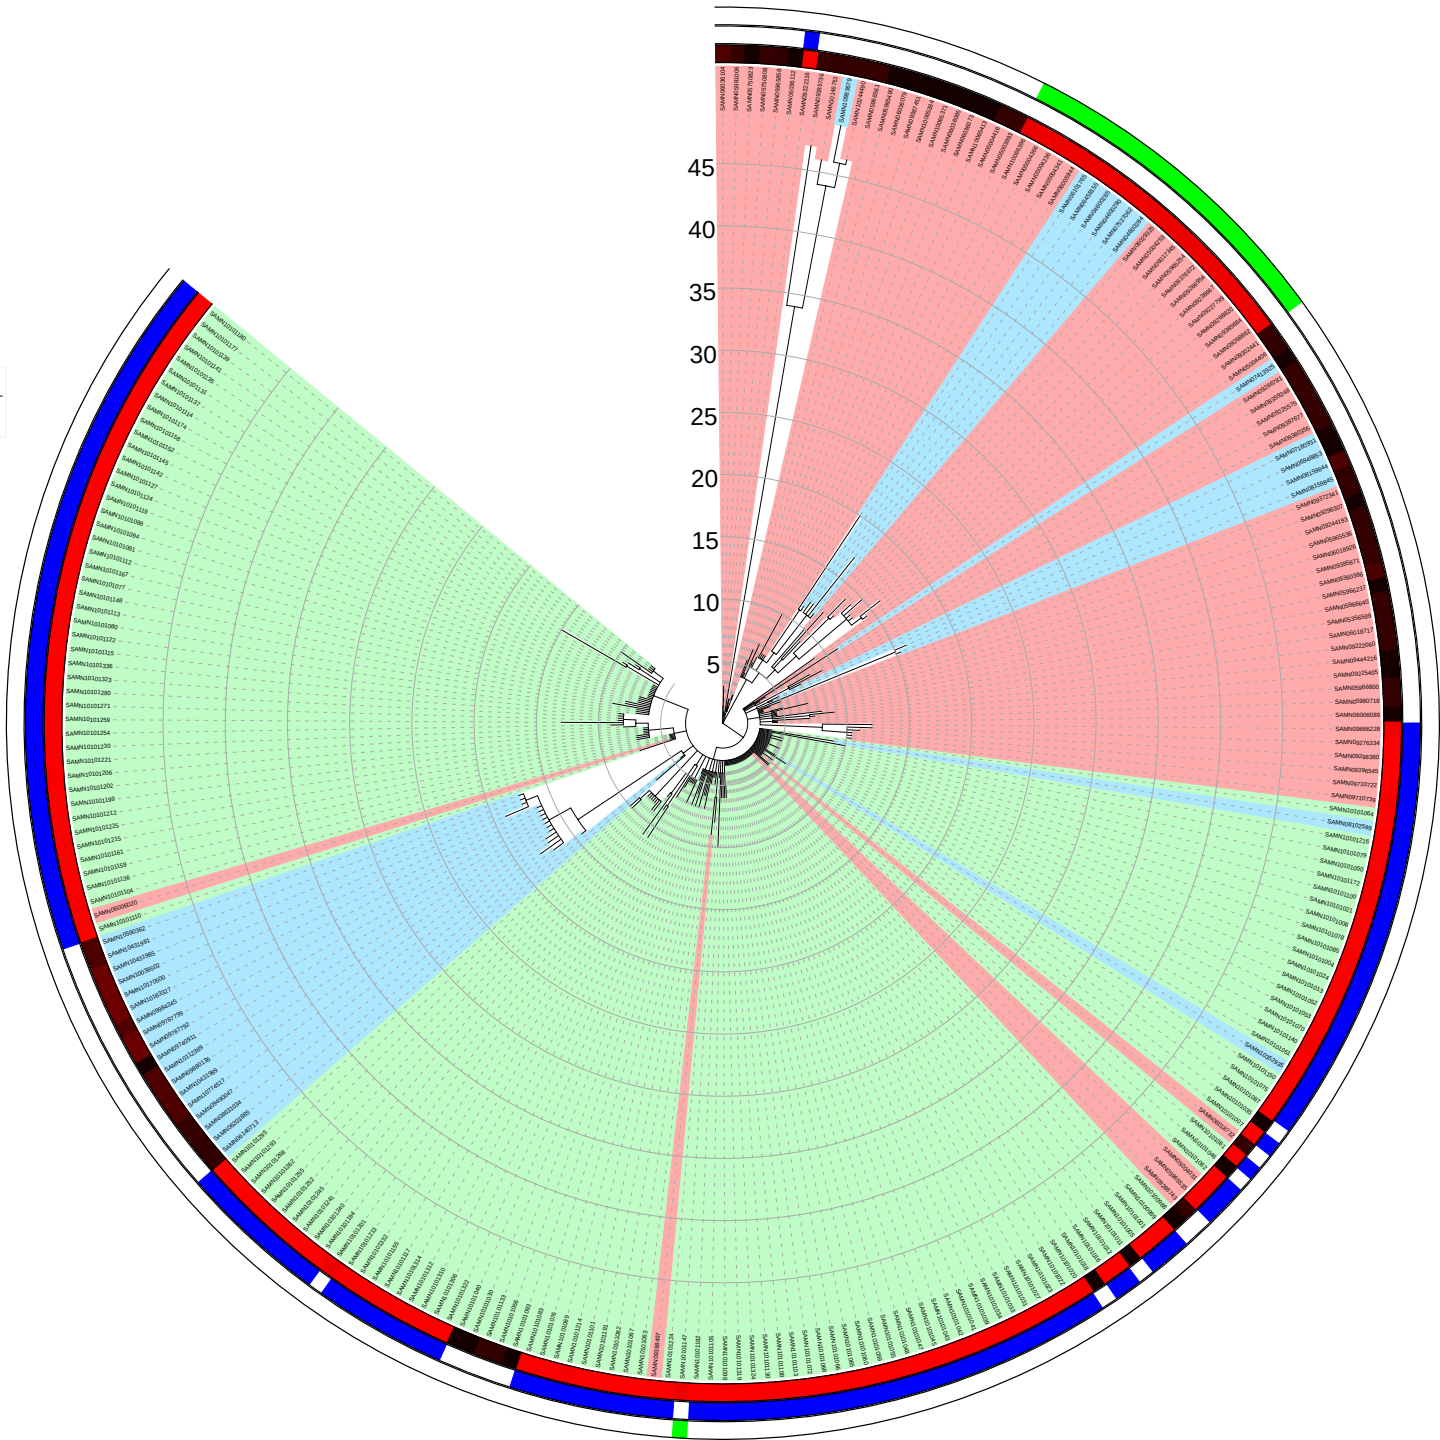

Tree scale: 1

**Country**

United States

**pMHMC\_004 coverage**

0%

100%

**pMHMC\_004 presence**

pMHMC\_004 presence

**pKSR100 presence**

pKSR100 presence

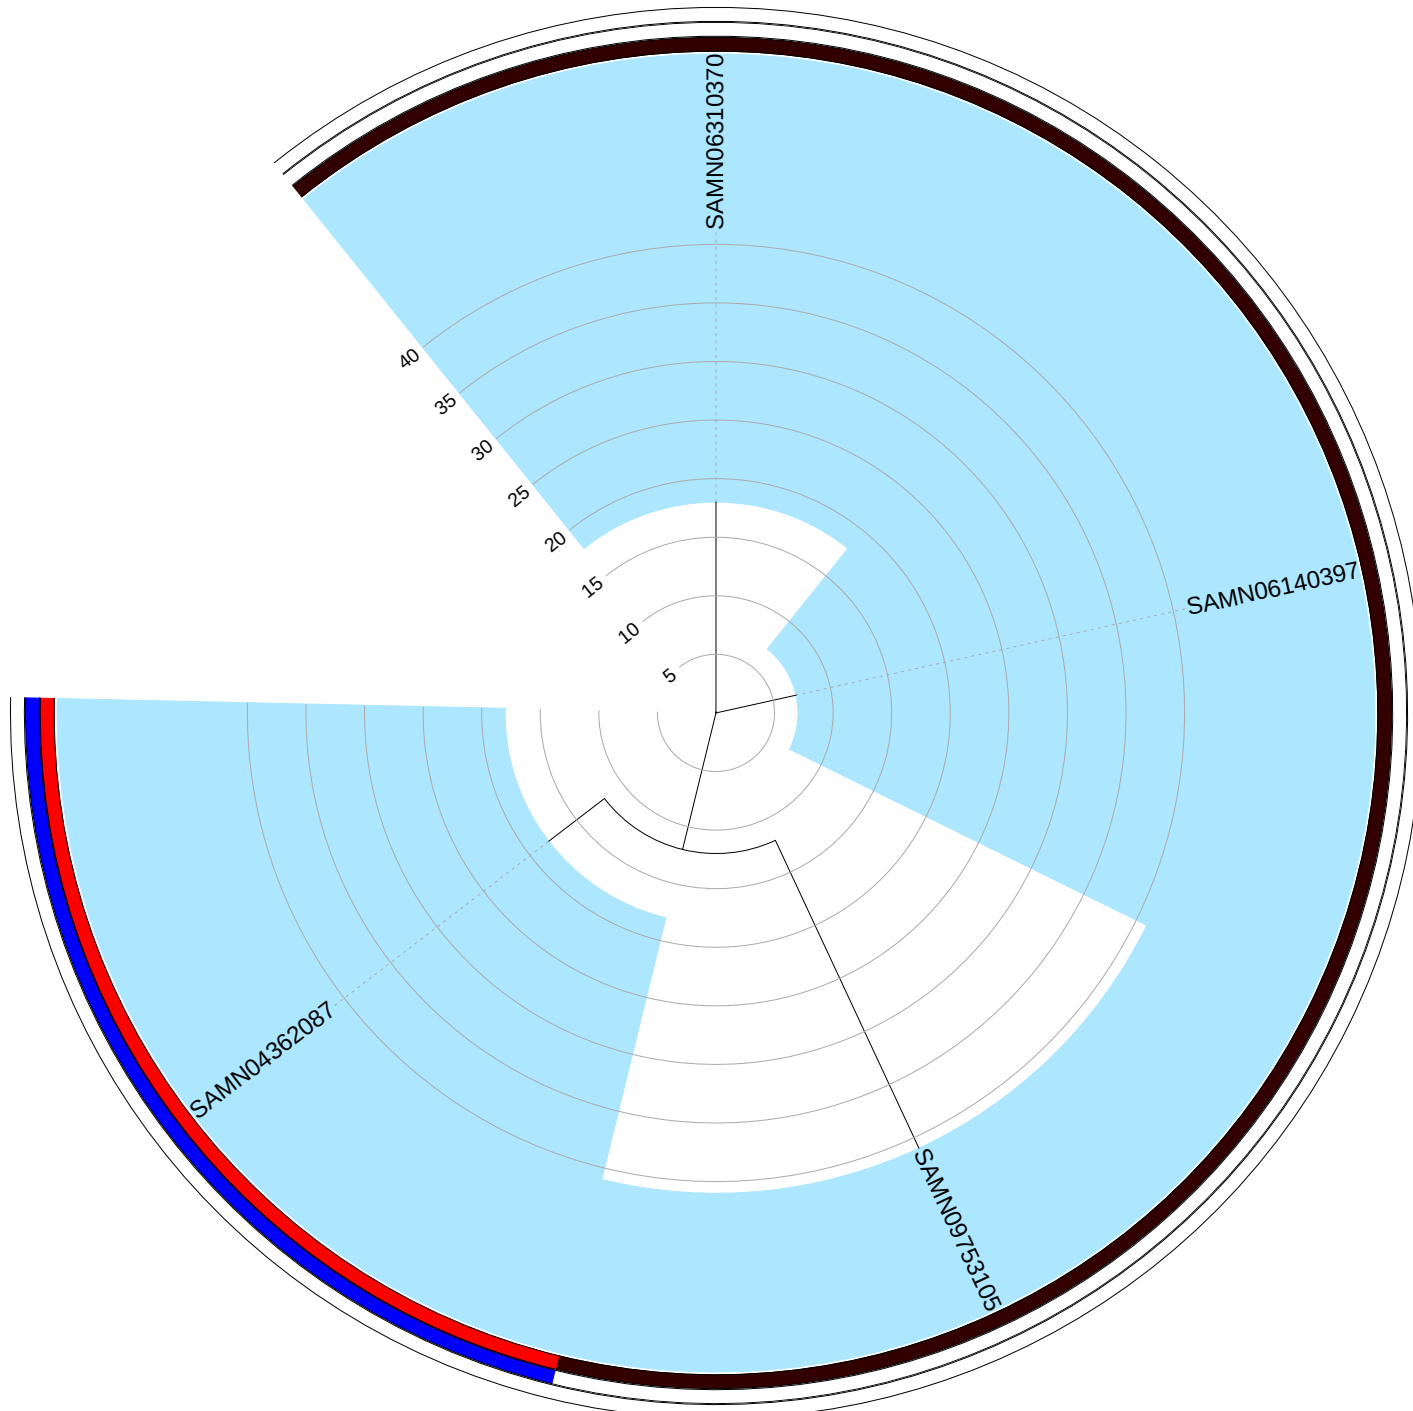

PDS000004894.5

Tree scale: 1

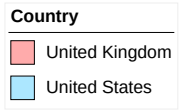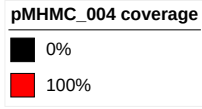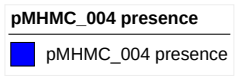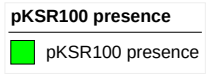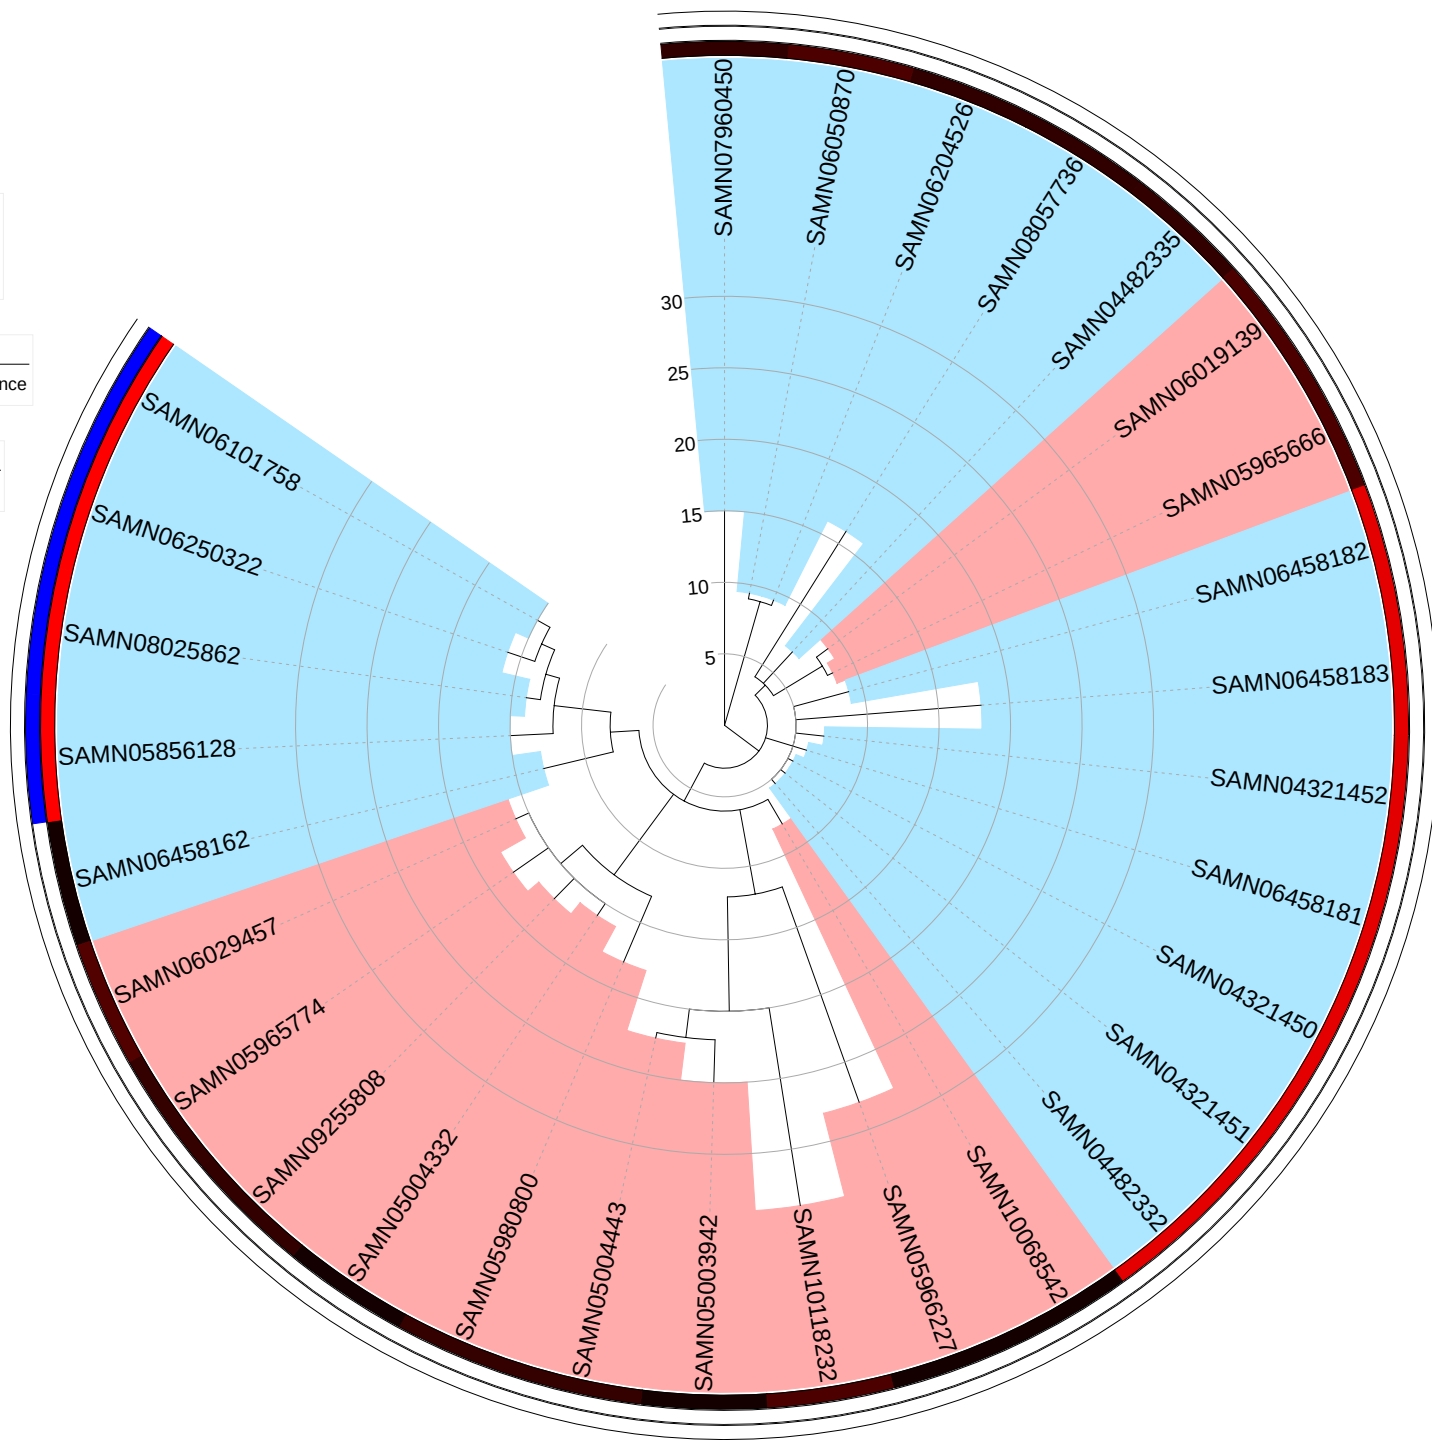

PDS000004902.34

Tree scale: 10

**Country**

- United Kingdom
- United States
- Other or none

**pMHMC\_004 coverage**

- 0%
- 100%

**pMHMC\_004 presence**

- pMHMC\_004 presence

**pKSR100 presence**

- pKSR100 presence

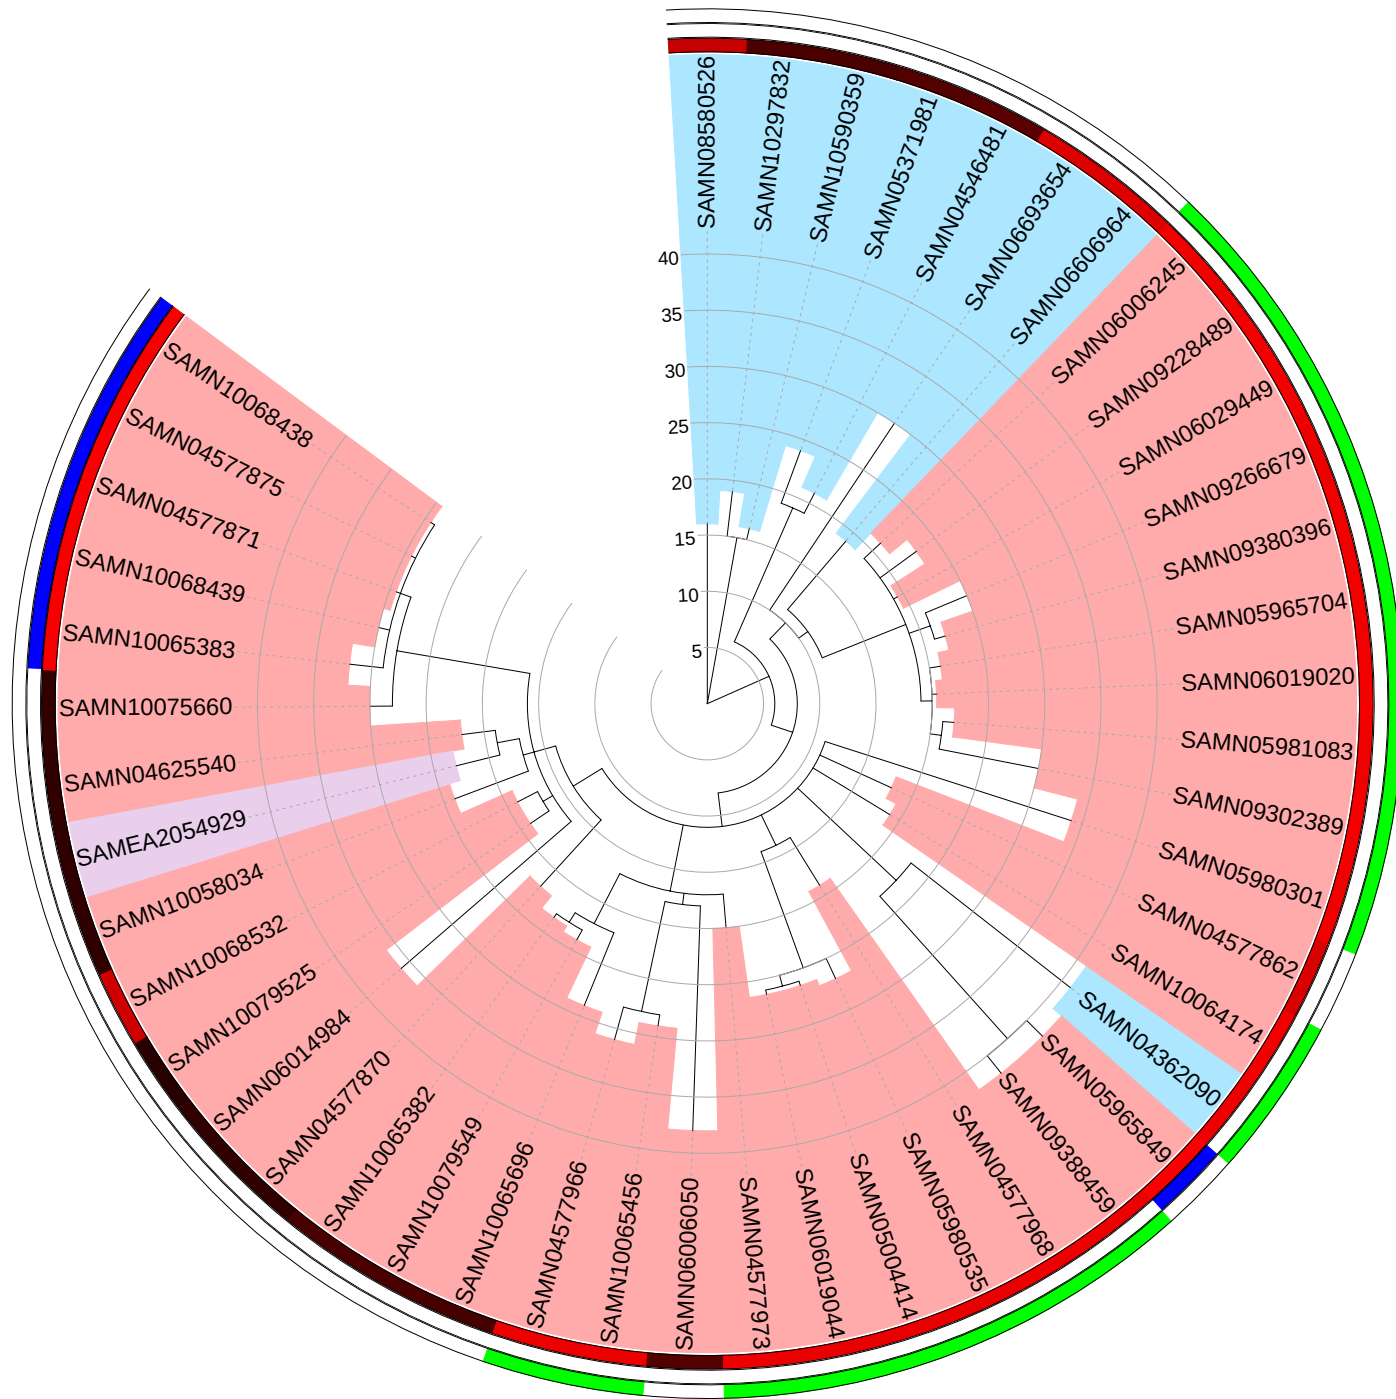

PDS000006023.31

Tree scale: 10

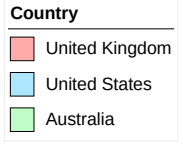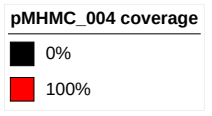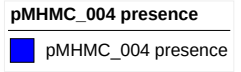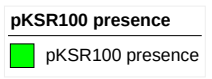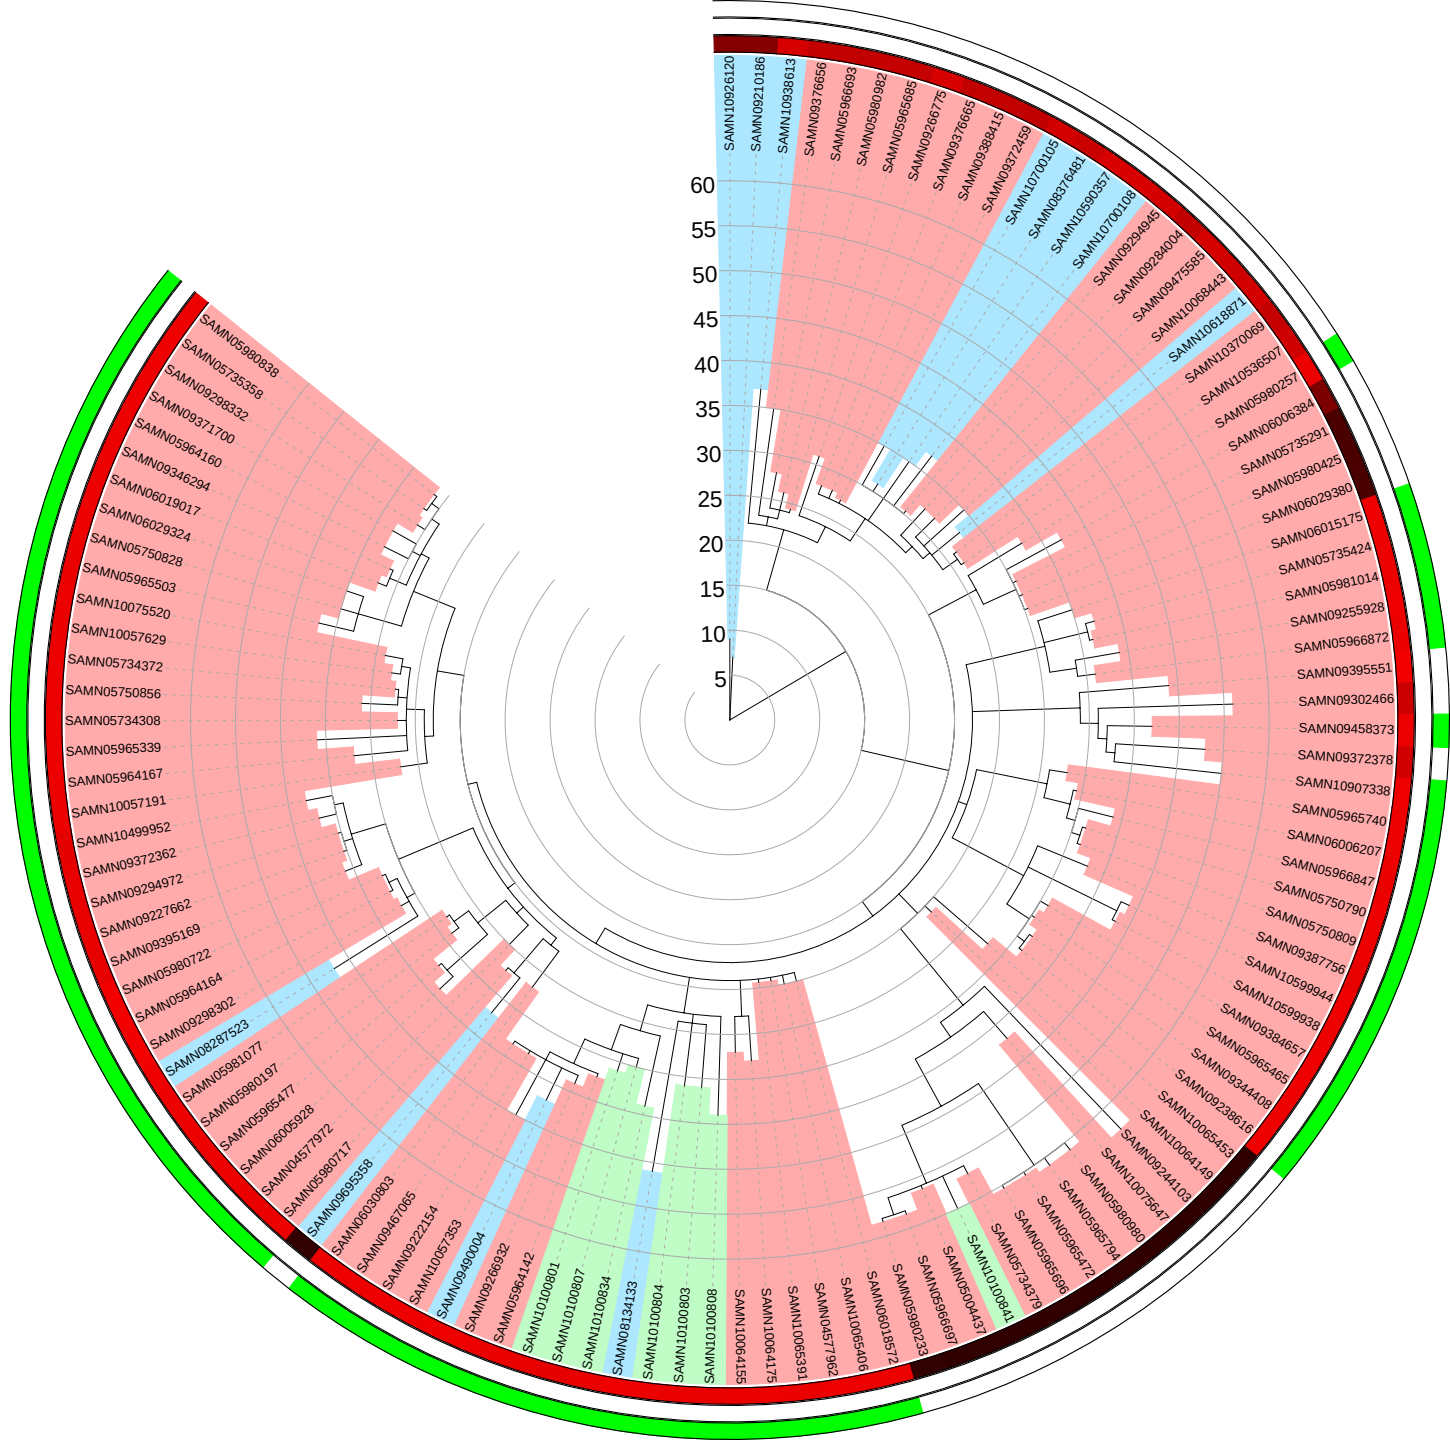

PDS000006025.53



Tree scale: 1 ⇄

**Country**

- United Kingdom
- United States
- Other or none
- Australia

**pMHMC\_004 coverage**

- 0%
- 100%

**pMHMC\_004 presence**

- pMHMC\_004 presence

**pKSR100 presence**

- pKSR100 presence

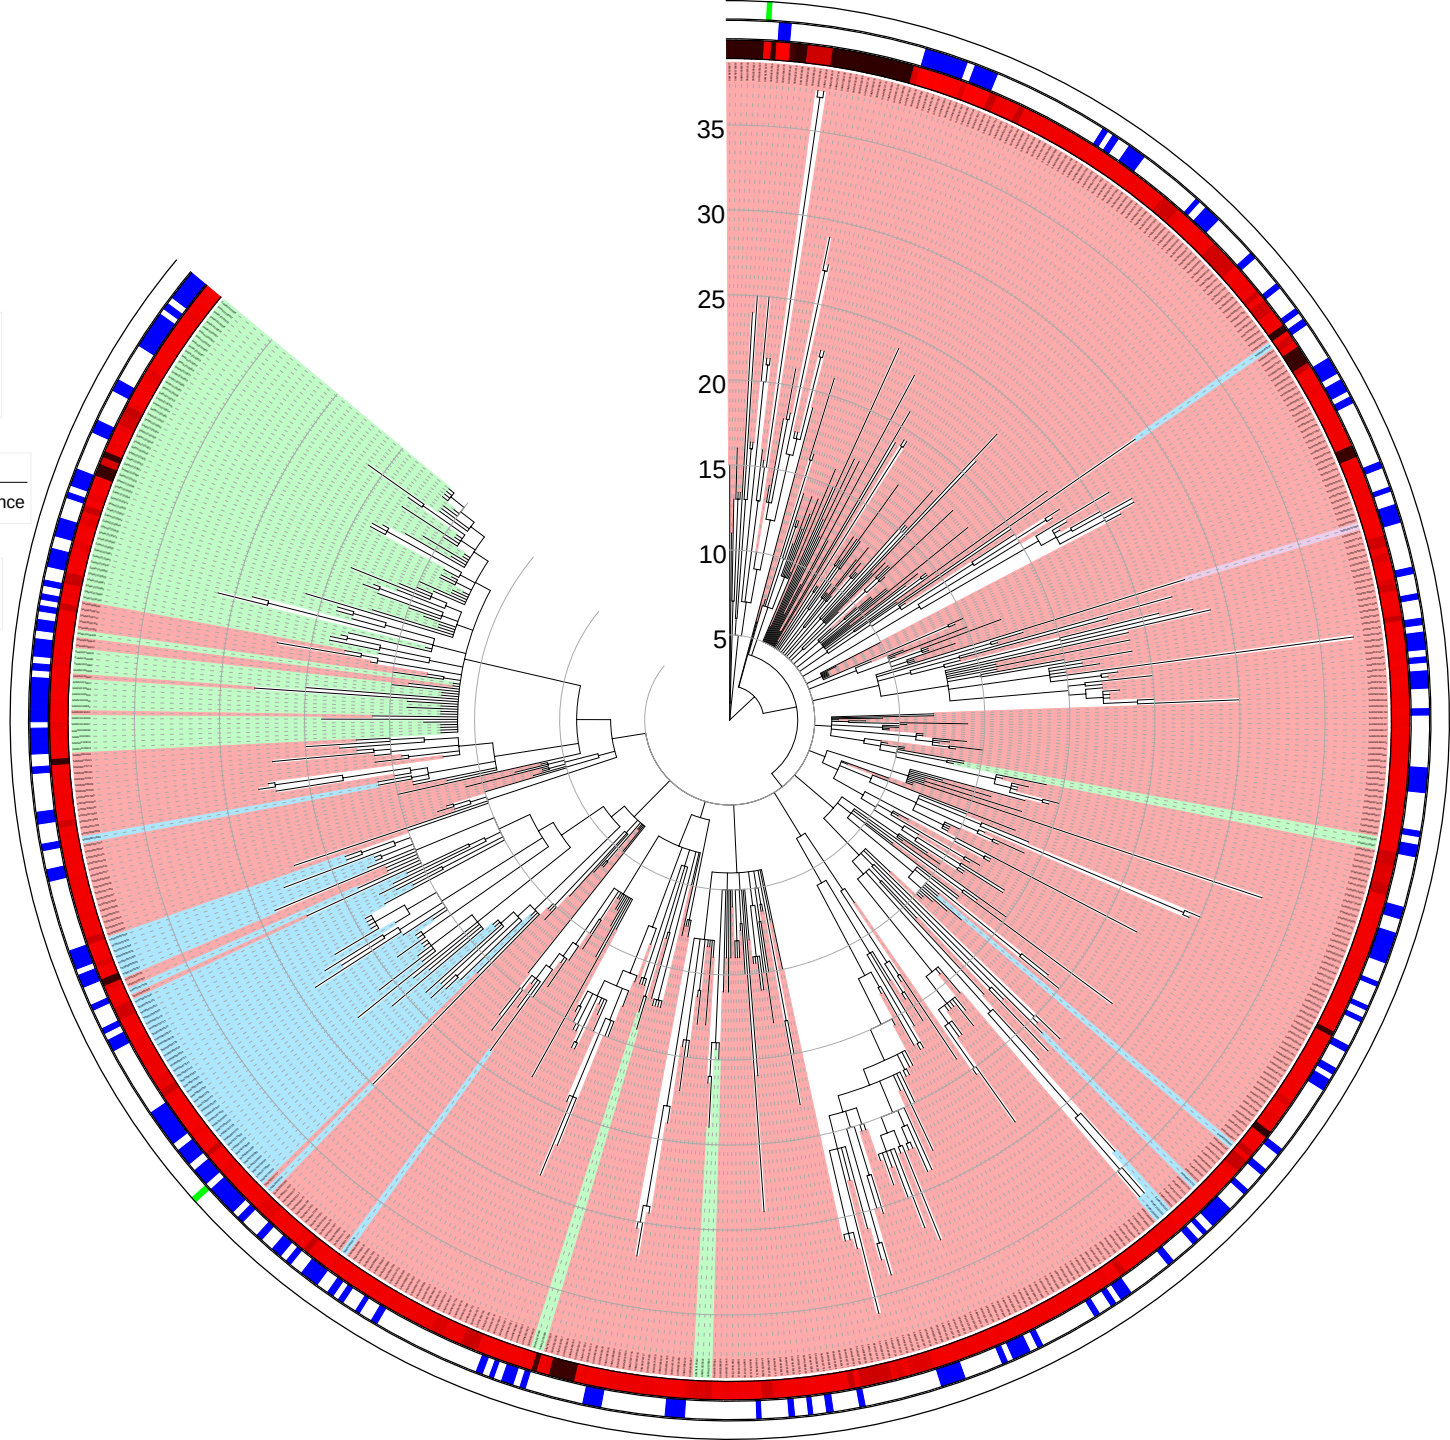

PDS000006028.122

Tree scale: 1

**Country**

- United Kingdom
- United States

**pMHMC\_004 coverage**

- 0%
- 100%

**pMHMC\_004 presence**

- pMHMC\_004 presence

**pKSR100 presence**

- pKSR100 presence

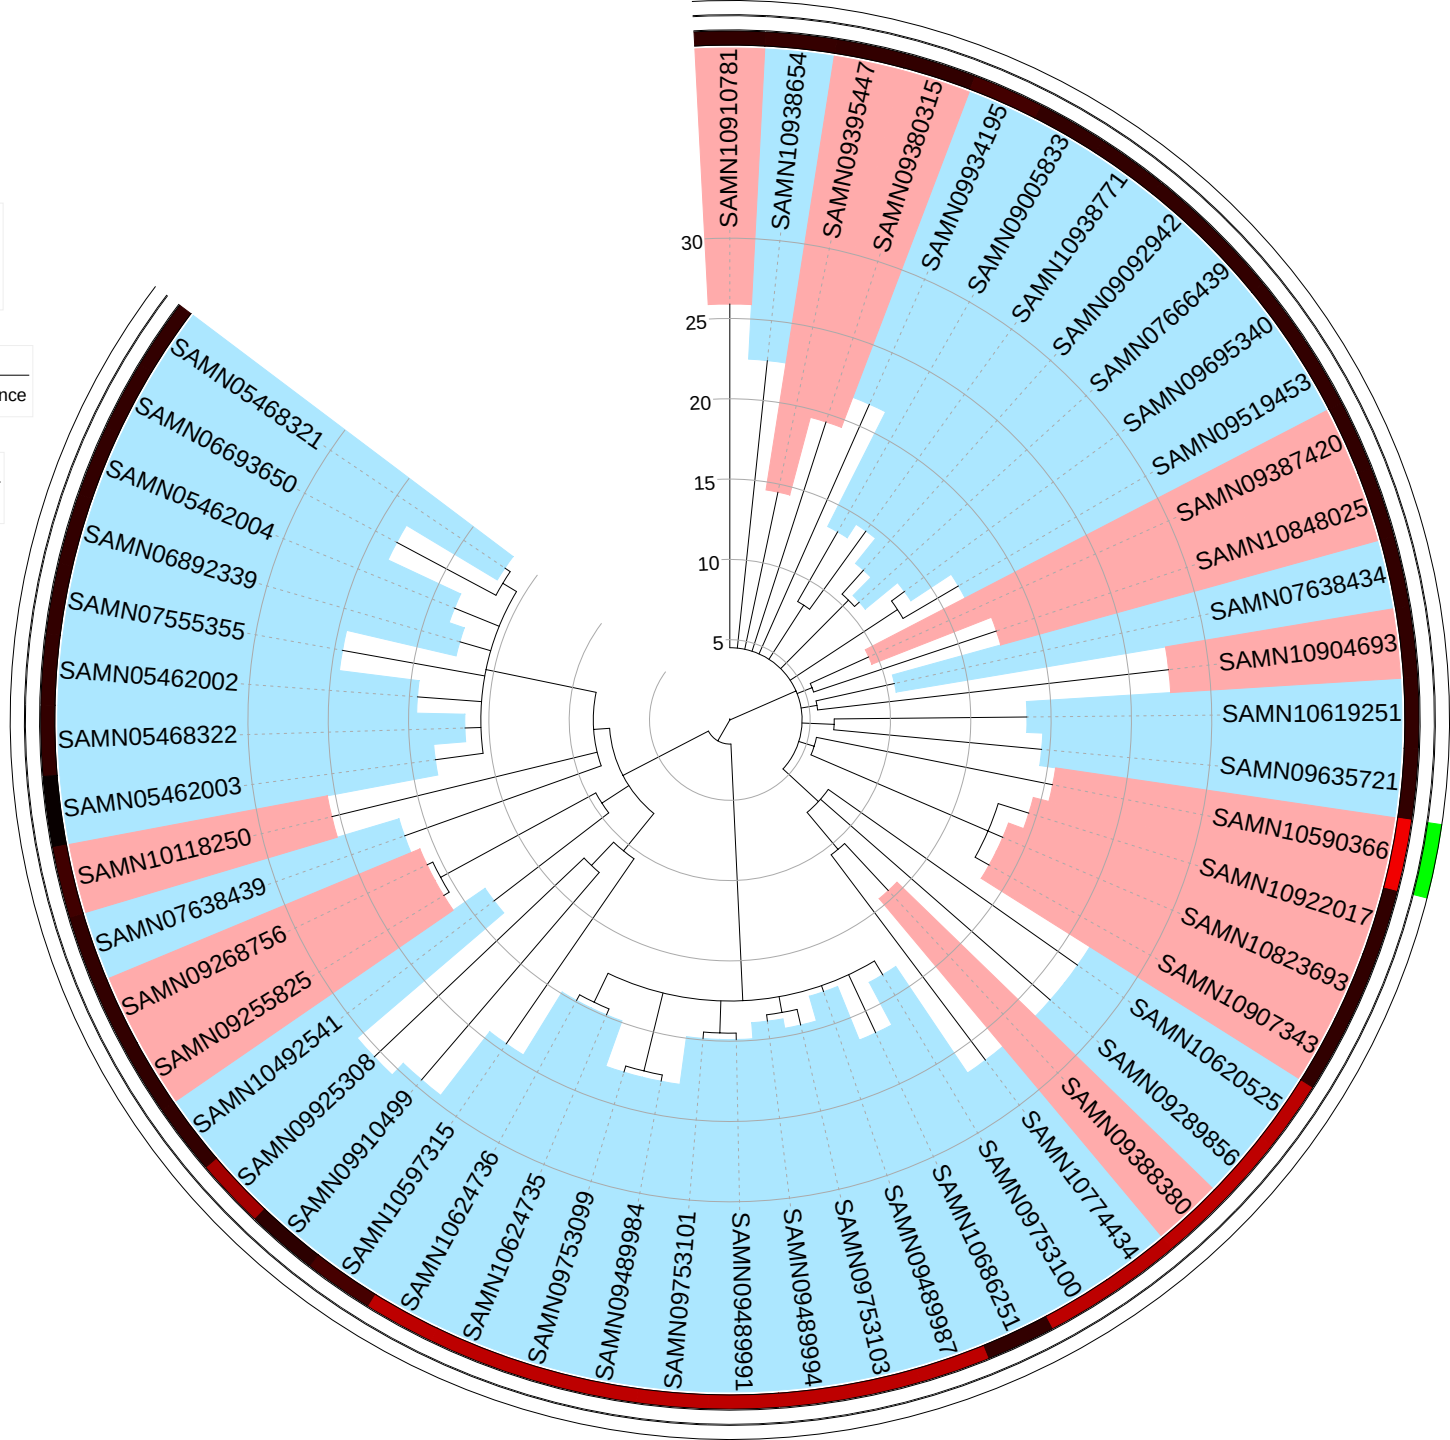

PDS000007367.47

Tree scale: 1

**Country**

- United Kingdom
- United States
- Other or none
- Australia

**pMHMC\_004 coverage**

- 0%
- 100%

**pMHMC\_004 presence**

- pMHMC\_004 presence

**pKSR100 presence**

- pKSR100 presence

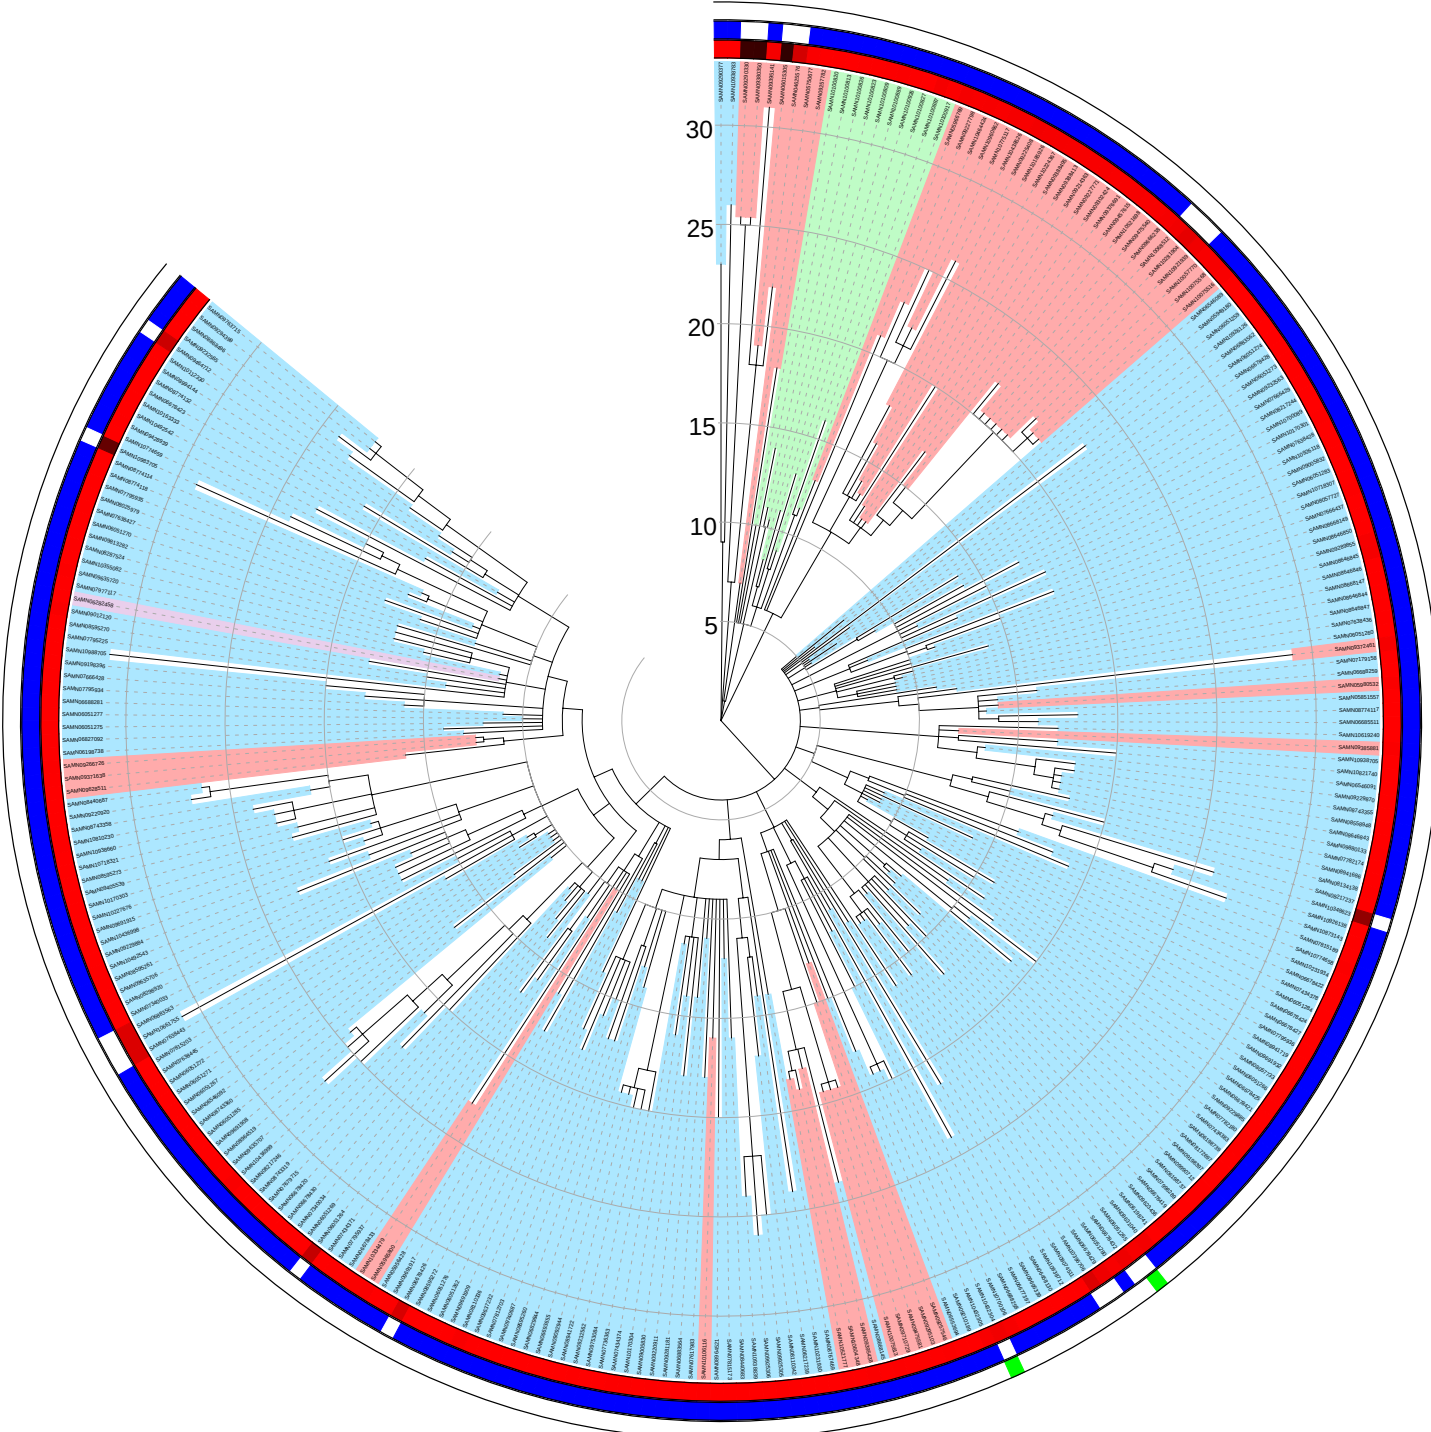

PDS000007822.142



Tree scale: 1

**Country**

United Kingdom

United States

**pMHMC\_004 coverage**

0%

100%

**pMHMC\_004 presence**

pMHMC\_004 presence

**pKSR100 presence**

pKSR100 presence

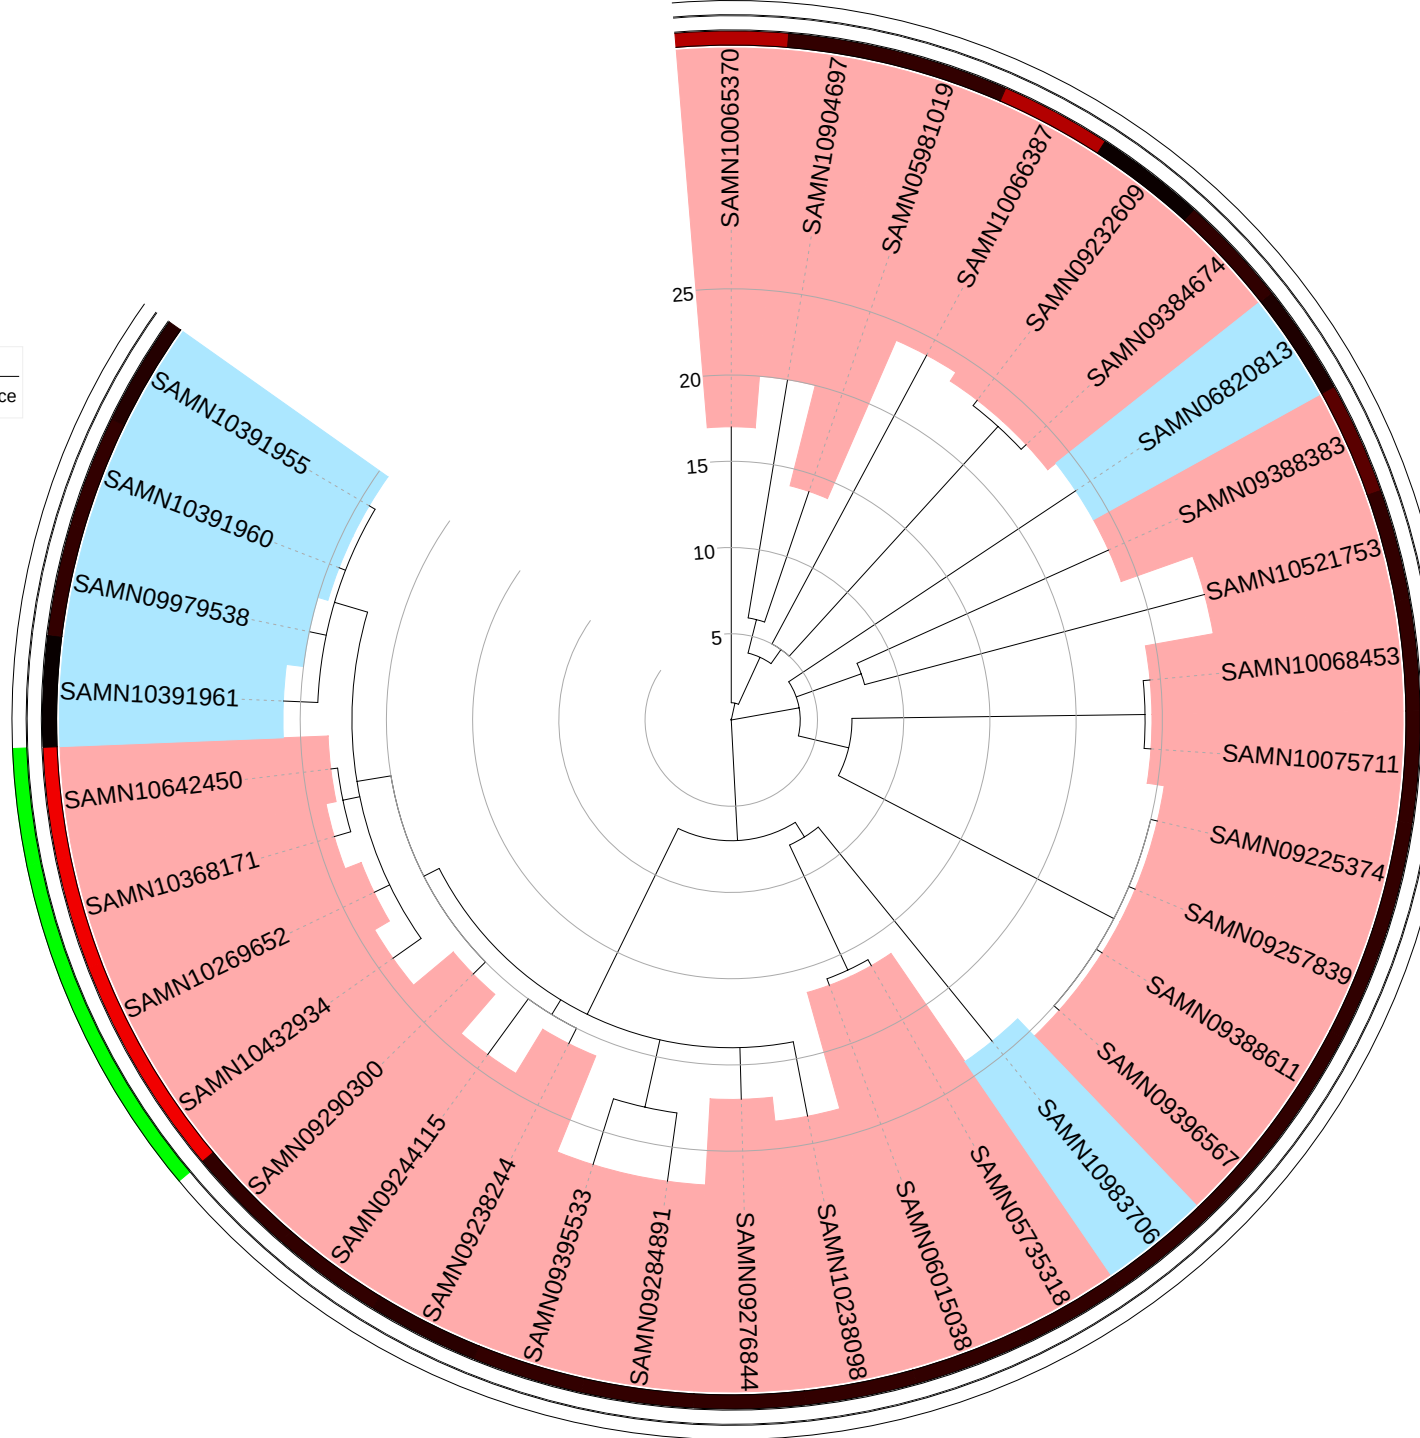

Tree scale: 1

**Country**

- United Kingdom
- United States

**pMHMC\_004 coverage**

- 0%
- 100%

**pMHMC\_004 presence**

- pMHMC\_004 presence

**pKSR100 presence**

- pKSR100 presence

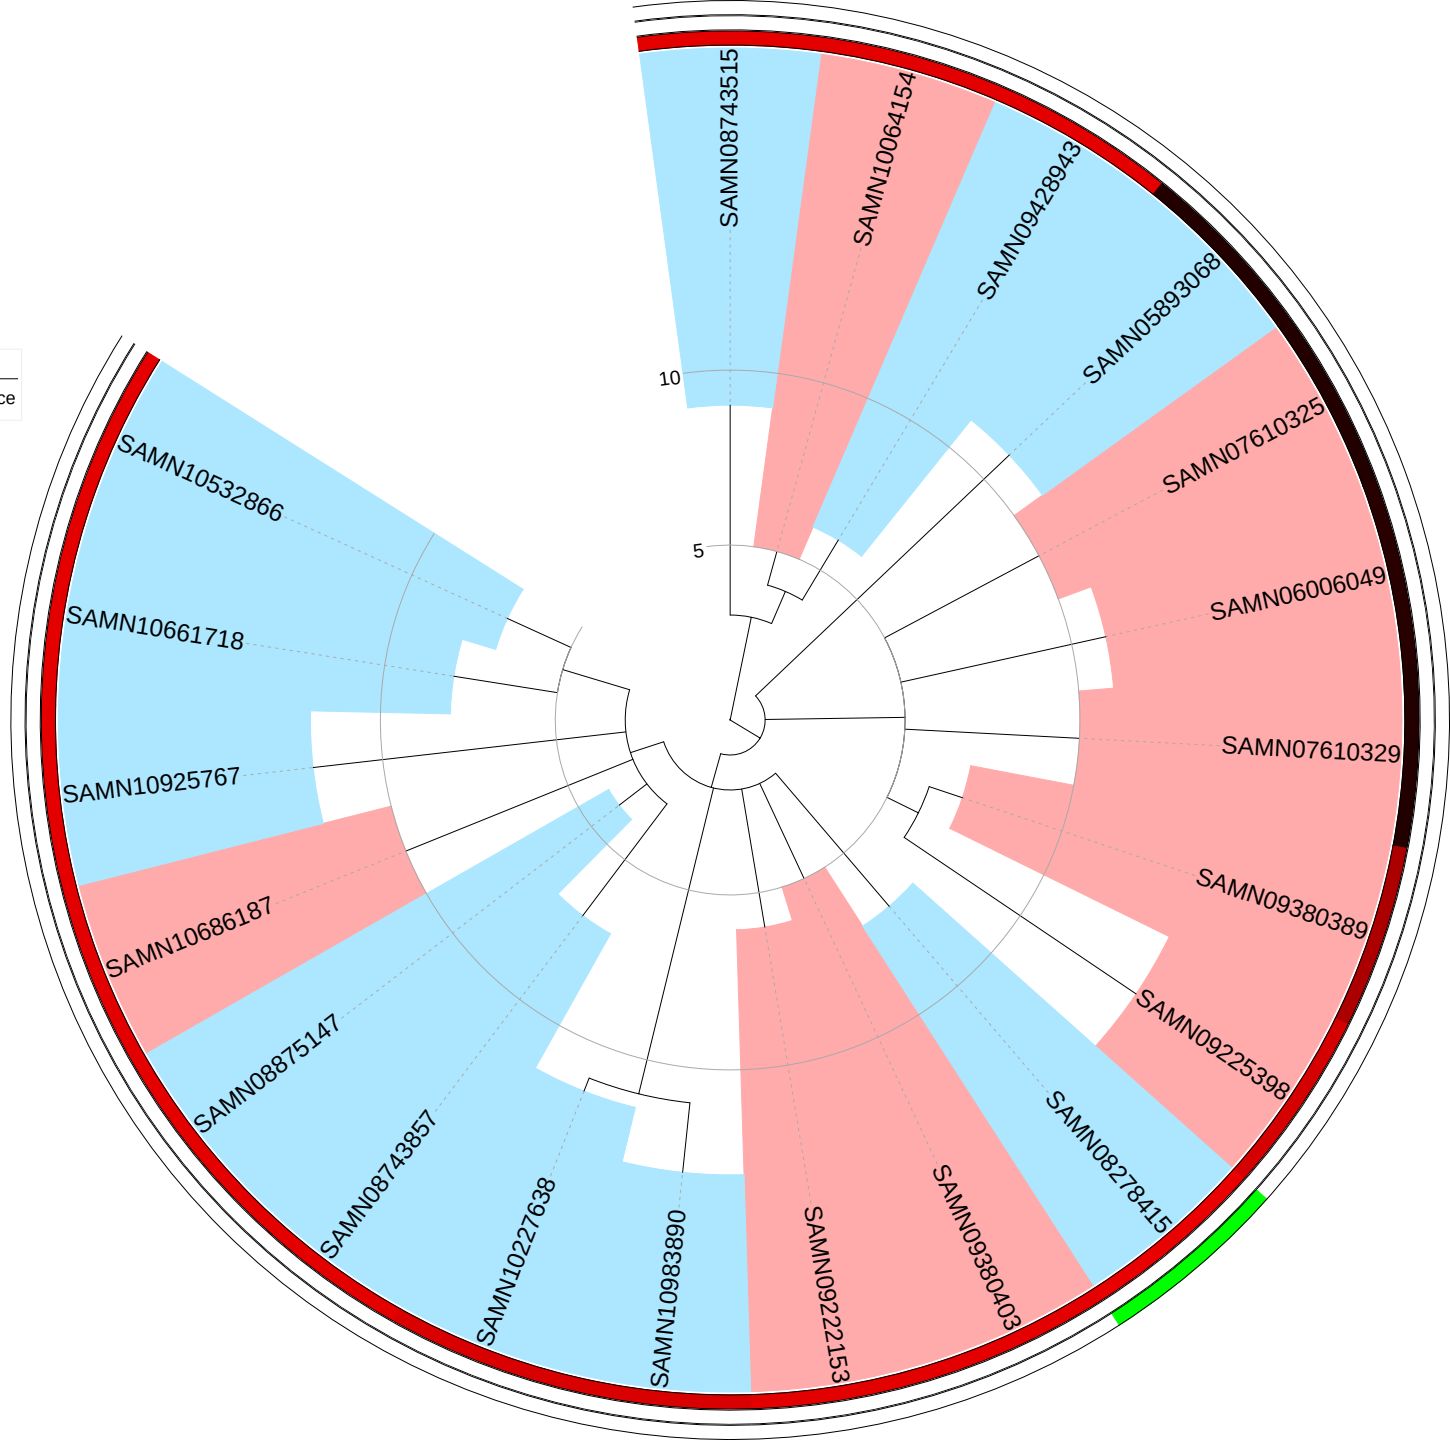

Tree scale: 10

**Country**

- United States
- United Kingdom

**pMHMC\_004 coverage**

- 0%
- 100%

**pMHMC\_004 presence**

- pMHMC\_004 presence

**pKSR100 presence**

- pKSR100 presence

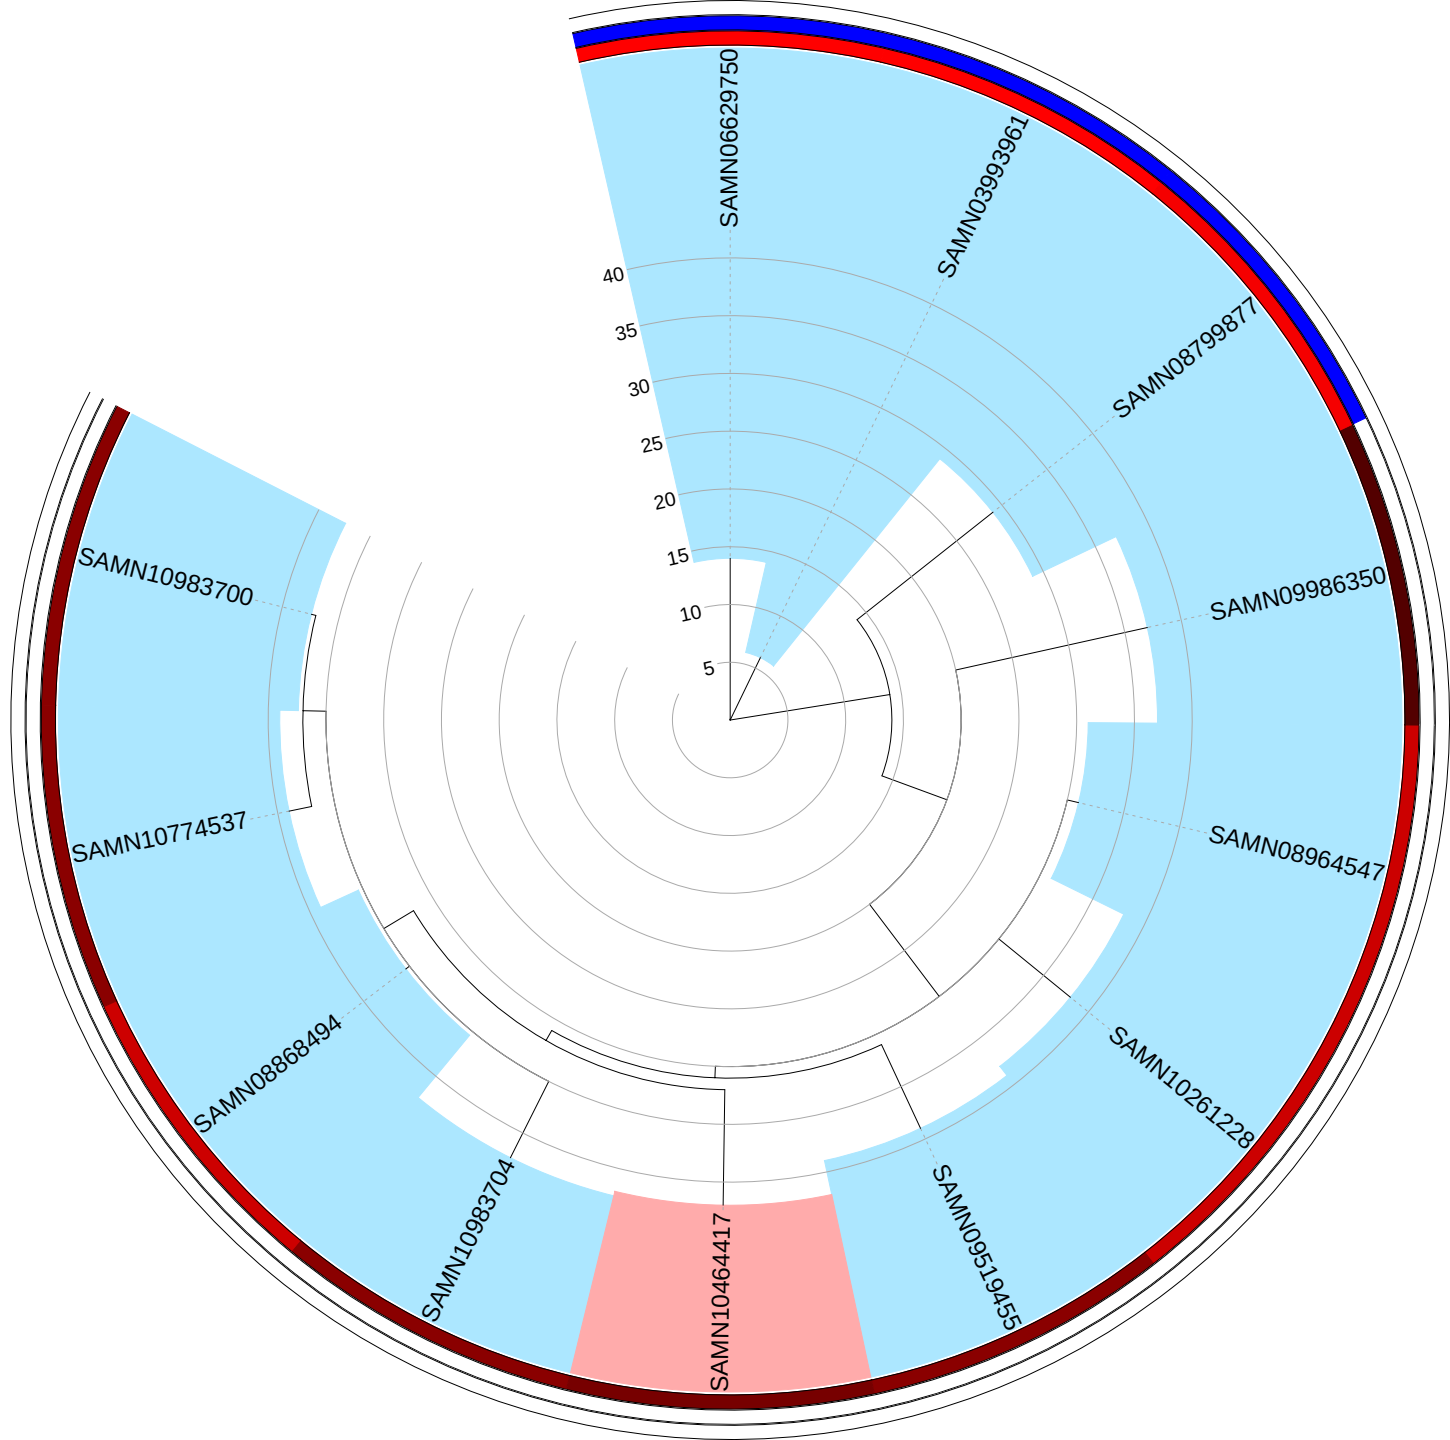

PDS000012064.15

Tree scale: 1

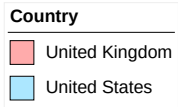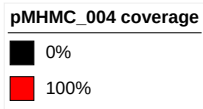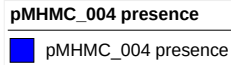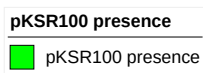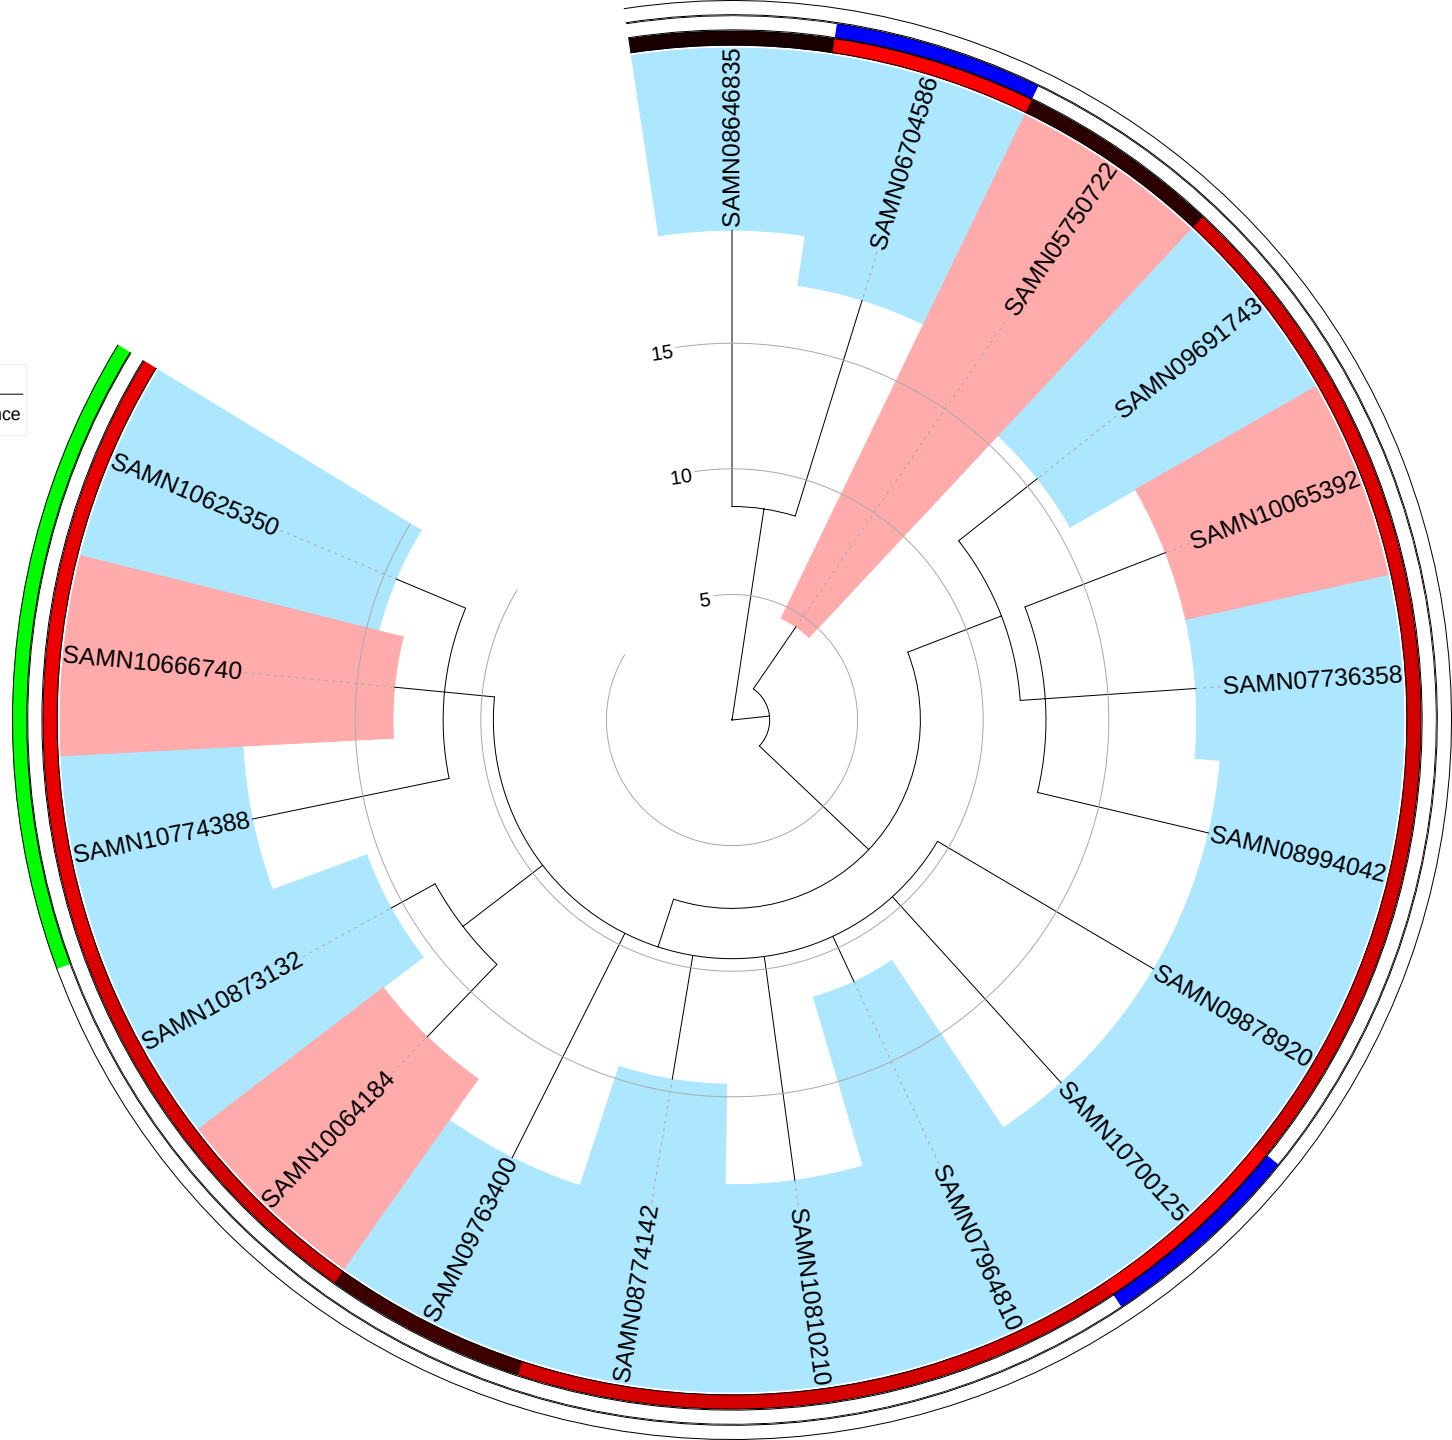

PDS000012316.21



Tree scale: 1

**Country**

United States

**pMHMC\_004 coverage**

0%

100%

**pMHMC\_004 presence**

pMHMC\_004 presence

**pKSR100 presence**

pKSR100 presence

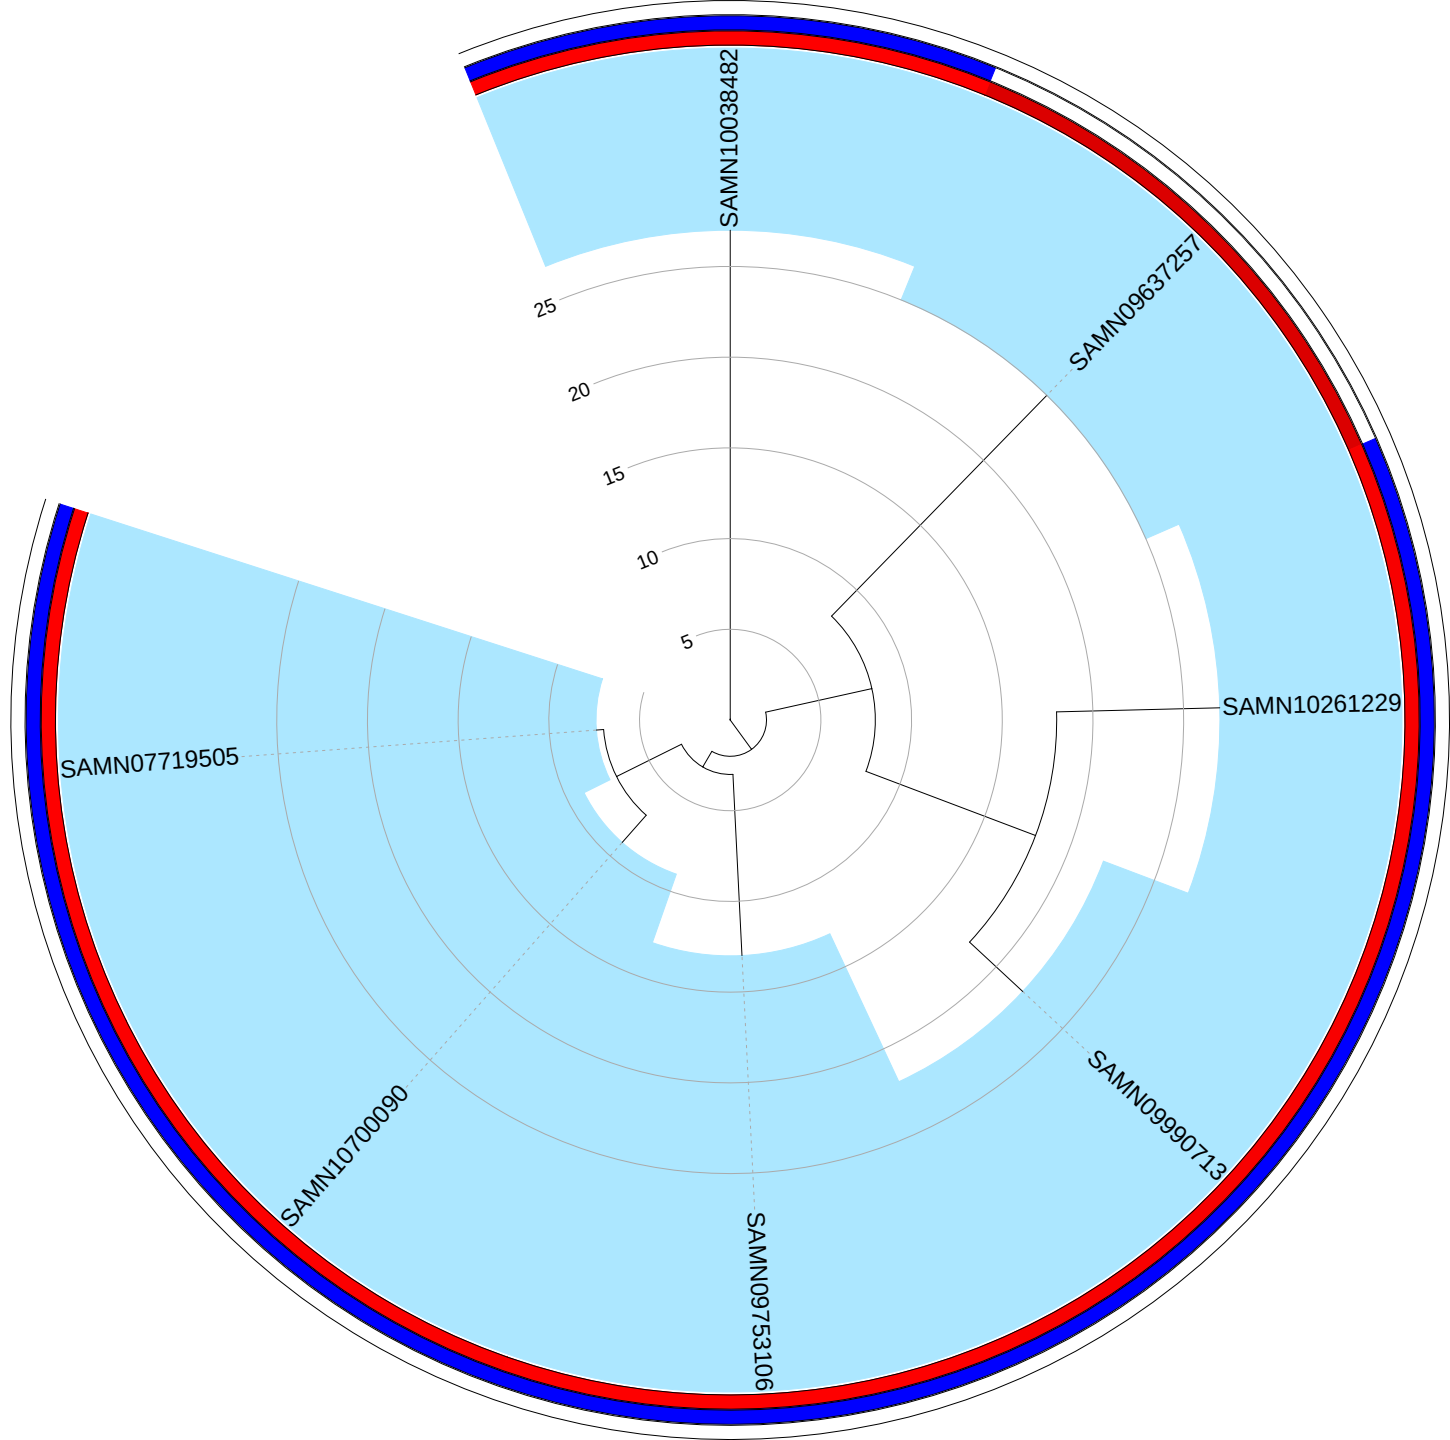

PDS000024112.9

Tree scale: 10

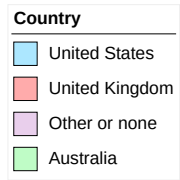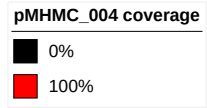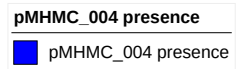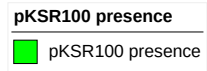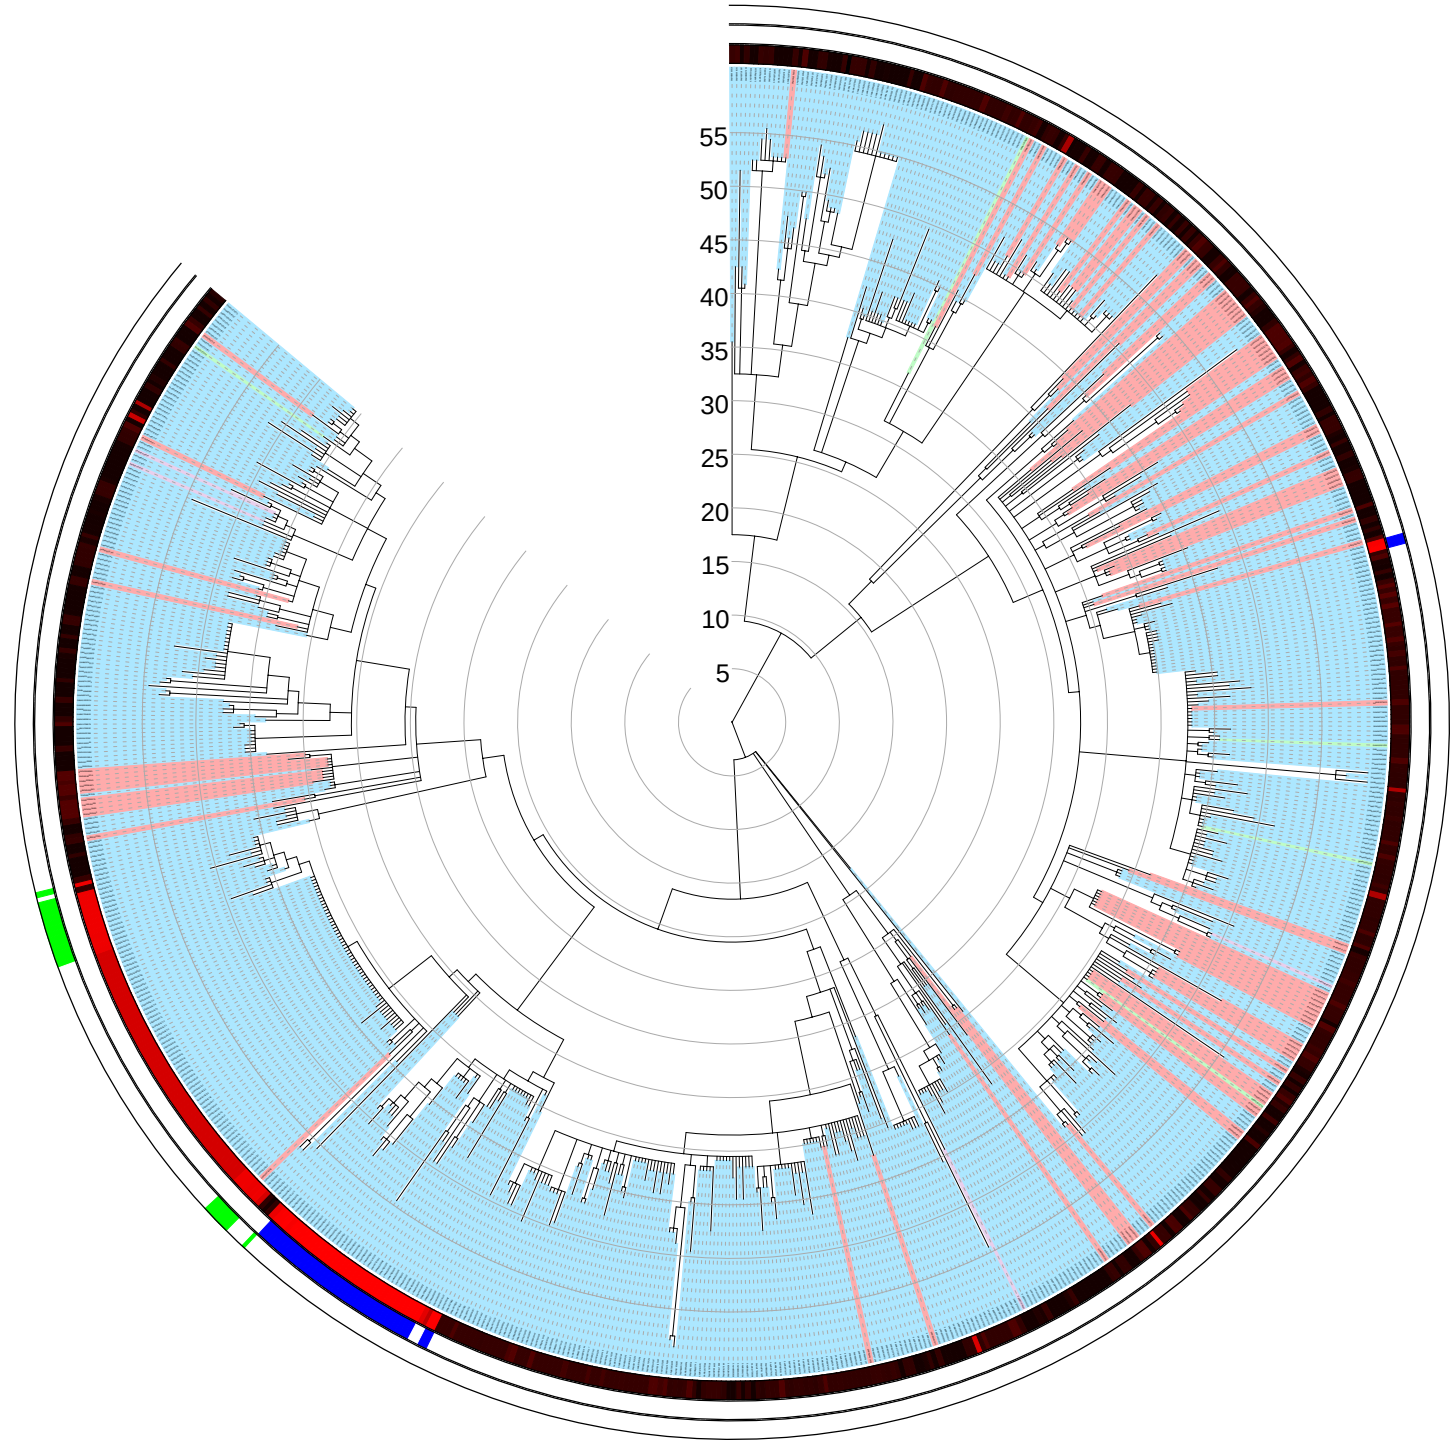

PDS000033340.81

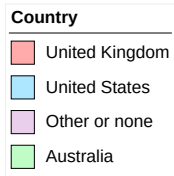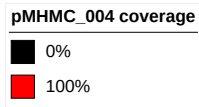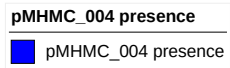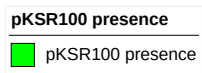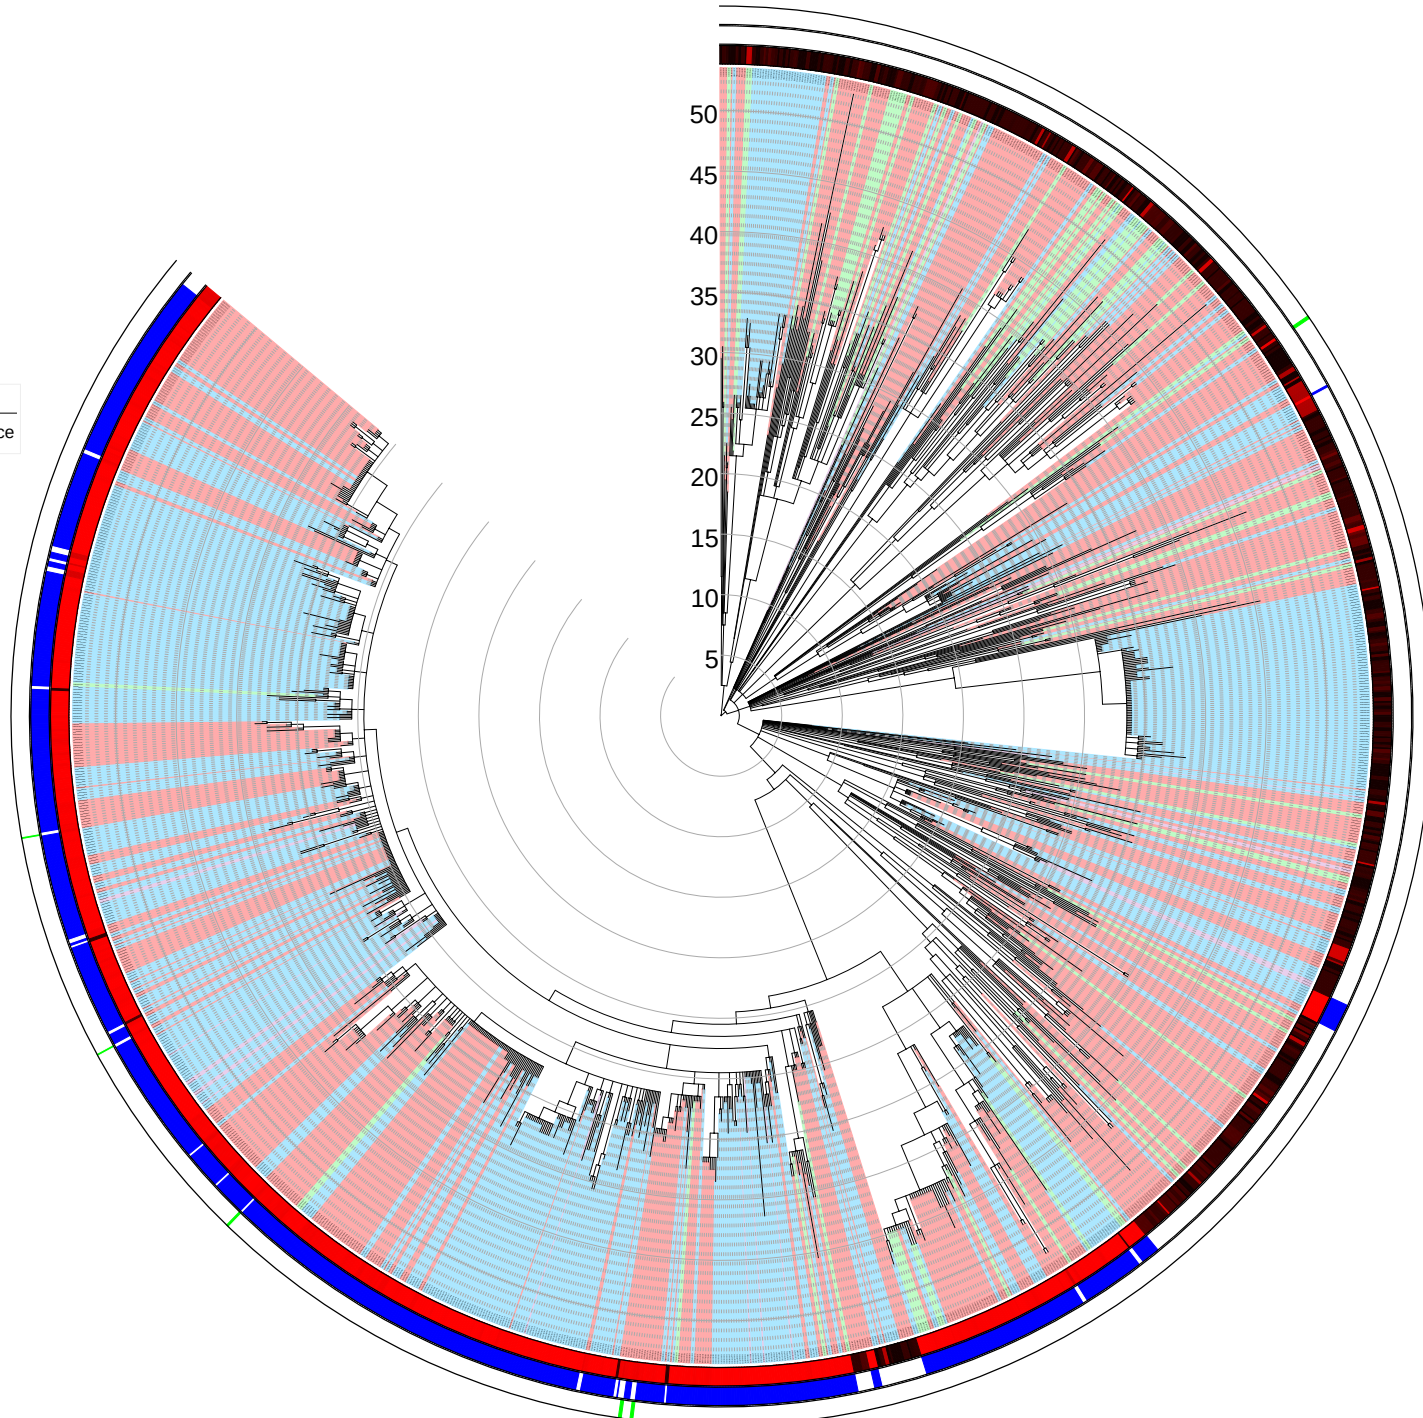



Tree scale: 1

**Country**  
United States

**pMHMC\_004 coverage**  
0%  
100%

**pMHMC\_004 presence**  
pMHMC\_004 presence

**pKSR100 presence**  
pKSR100 presence

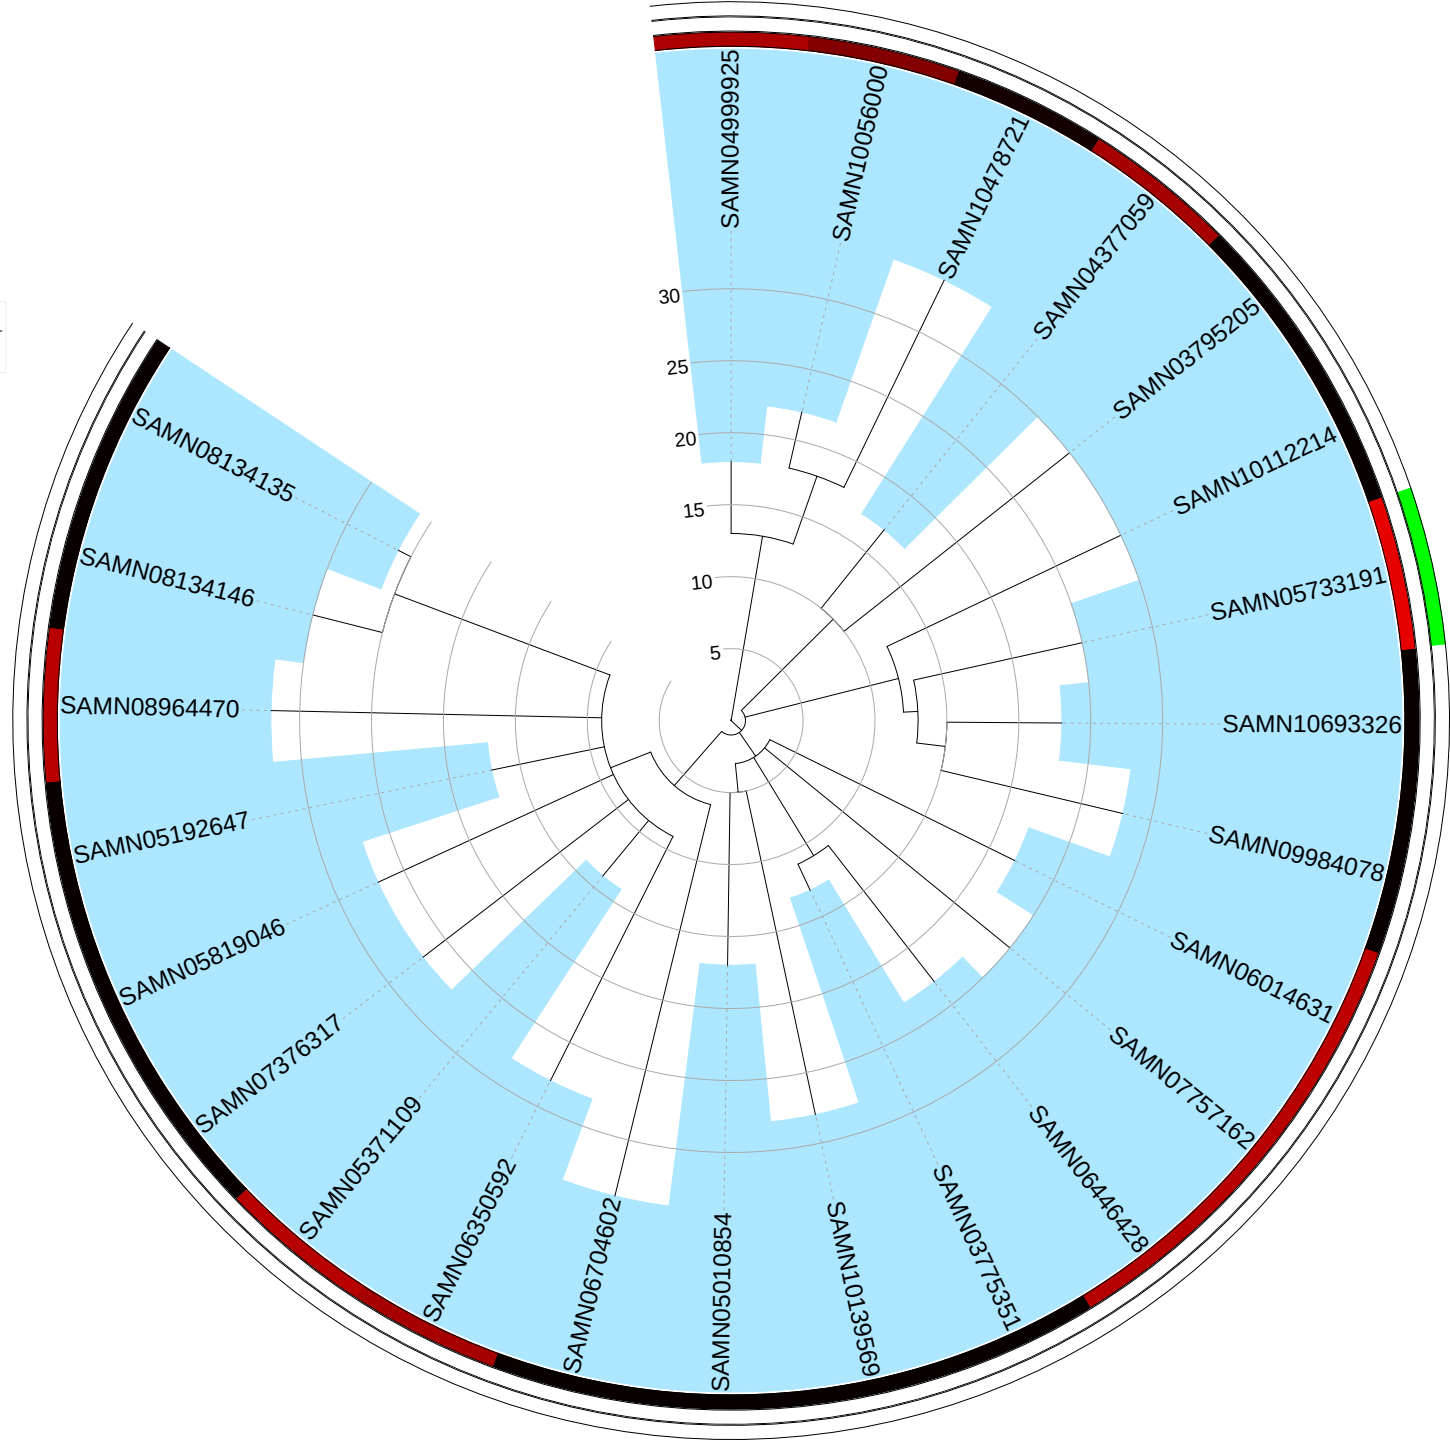

PDS000033550.7



Tree scale: 1 ⇄

**Country**

United States

United Kingdom

**pMHMC\_004 coverage**

0%

100%

**pMHMC\_004 presence**

pMHMC\_004 presence

**pKSR100 presence**

pKSR100 presence

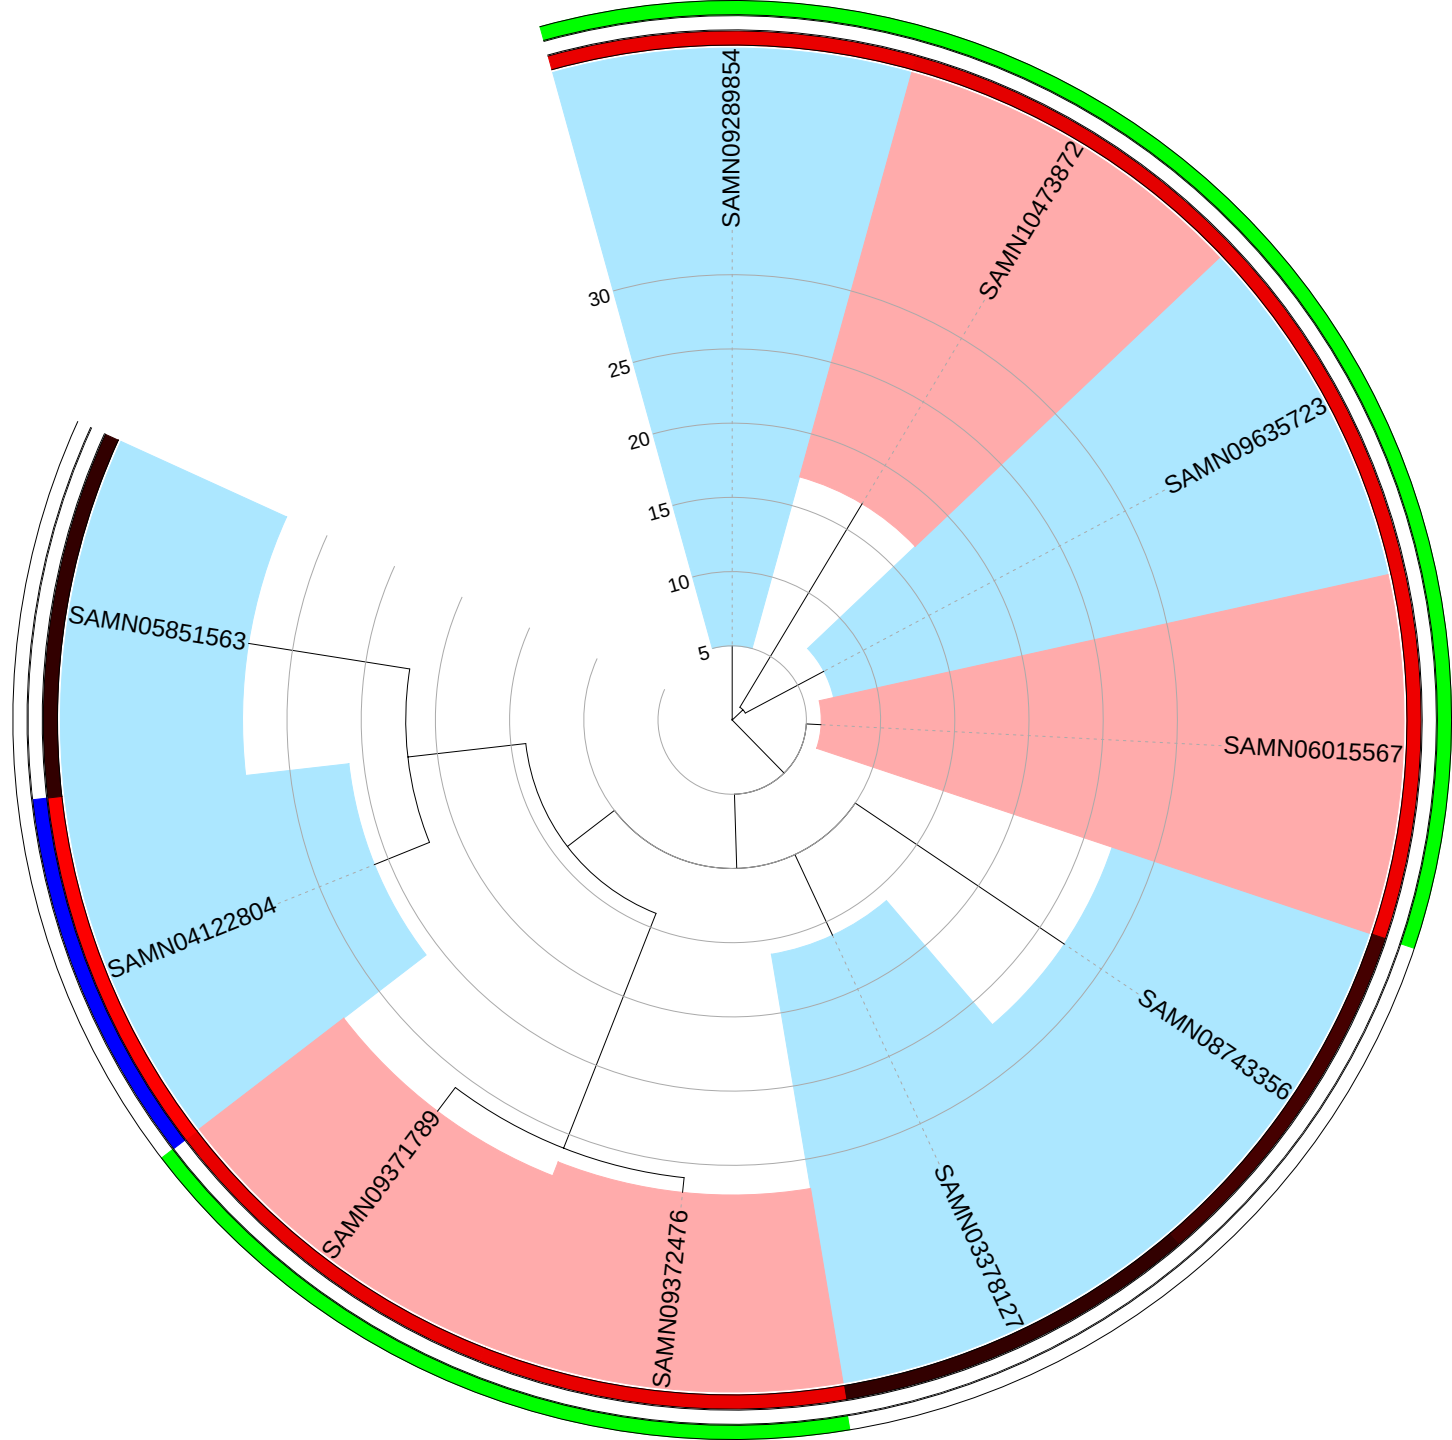

PDS000033562.4

Tree scale: 1

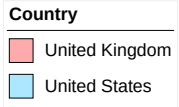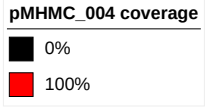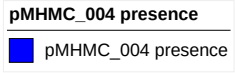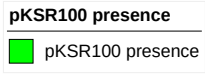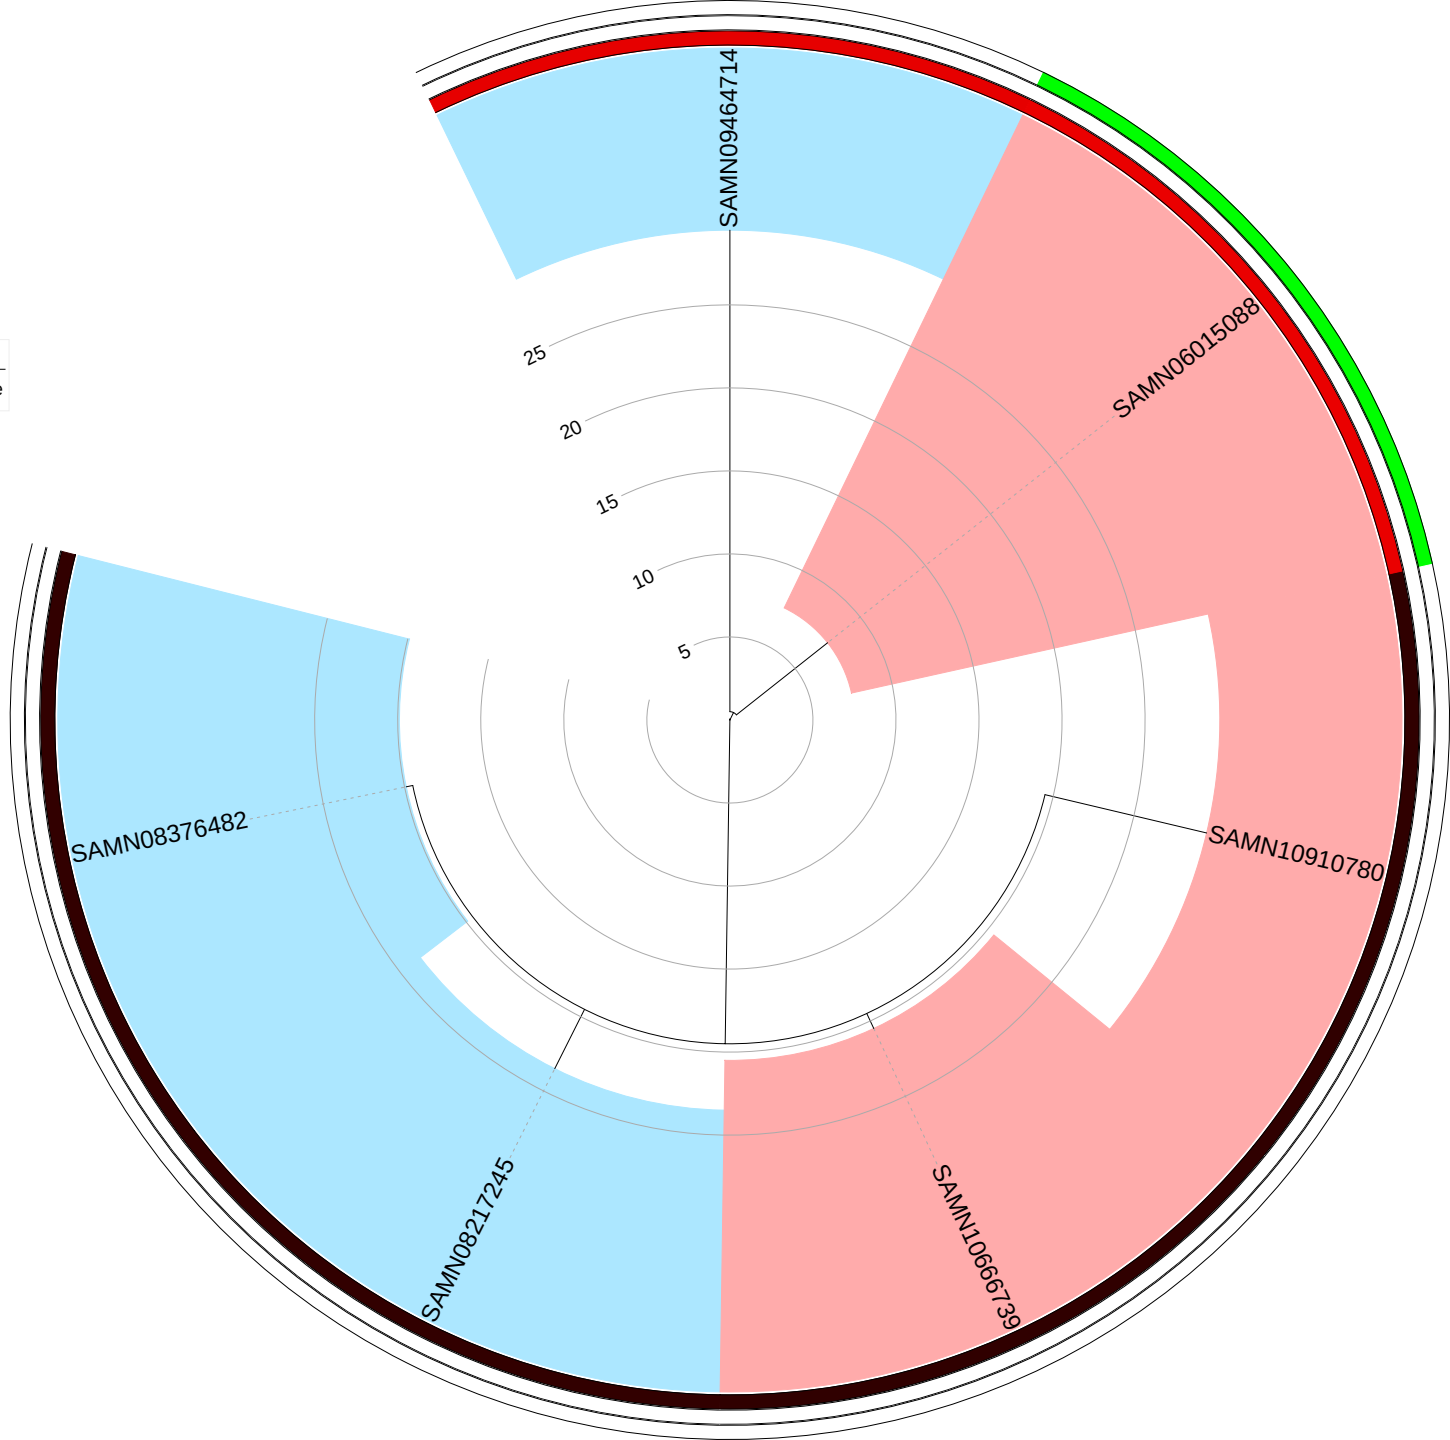

PDS000033573.4

Tree scale: 1

**Country**

United Kingdom

**pMHMC\_004 coverage**

0%

100%

**pMHMC\_004 presence**

pMHMC\_004 presence

**pKSR100 presence**

pKSR100 presence

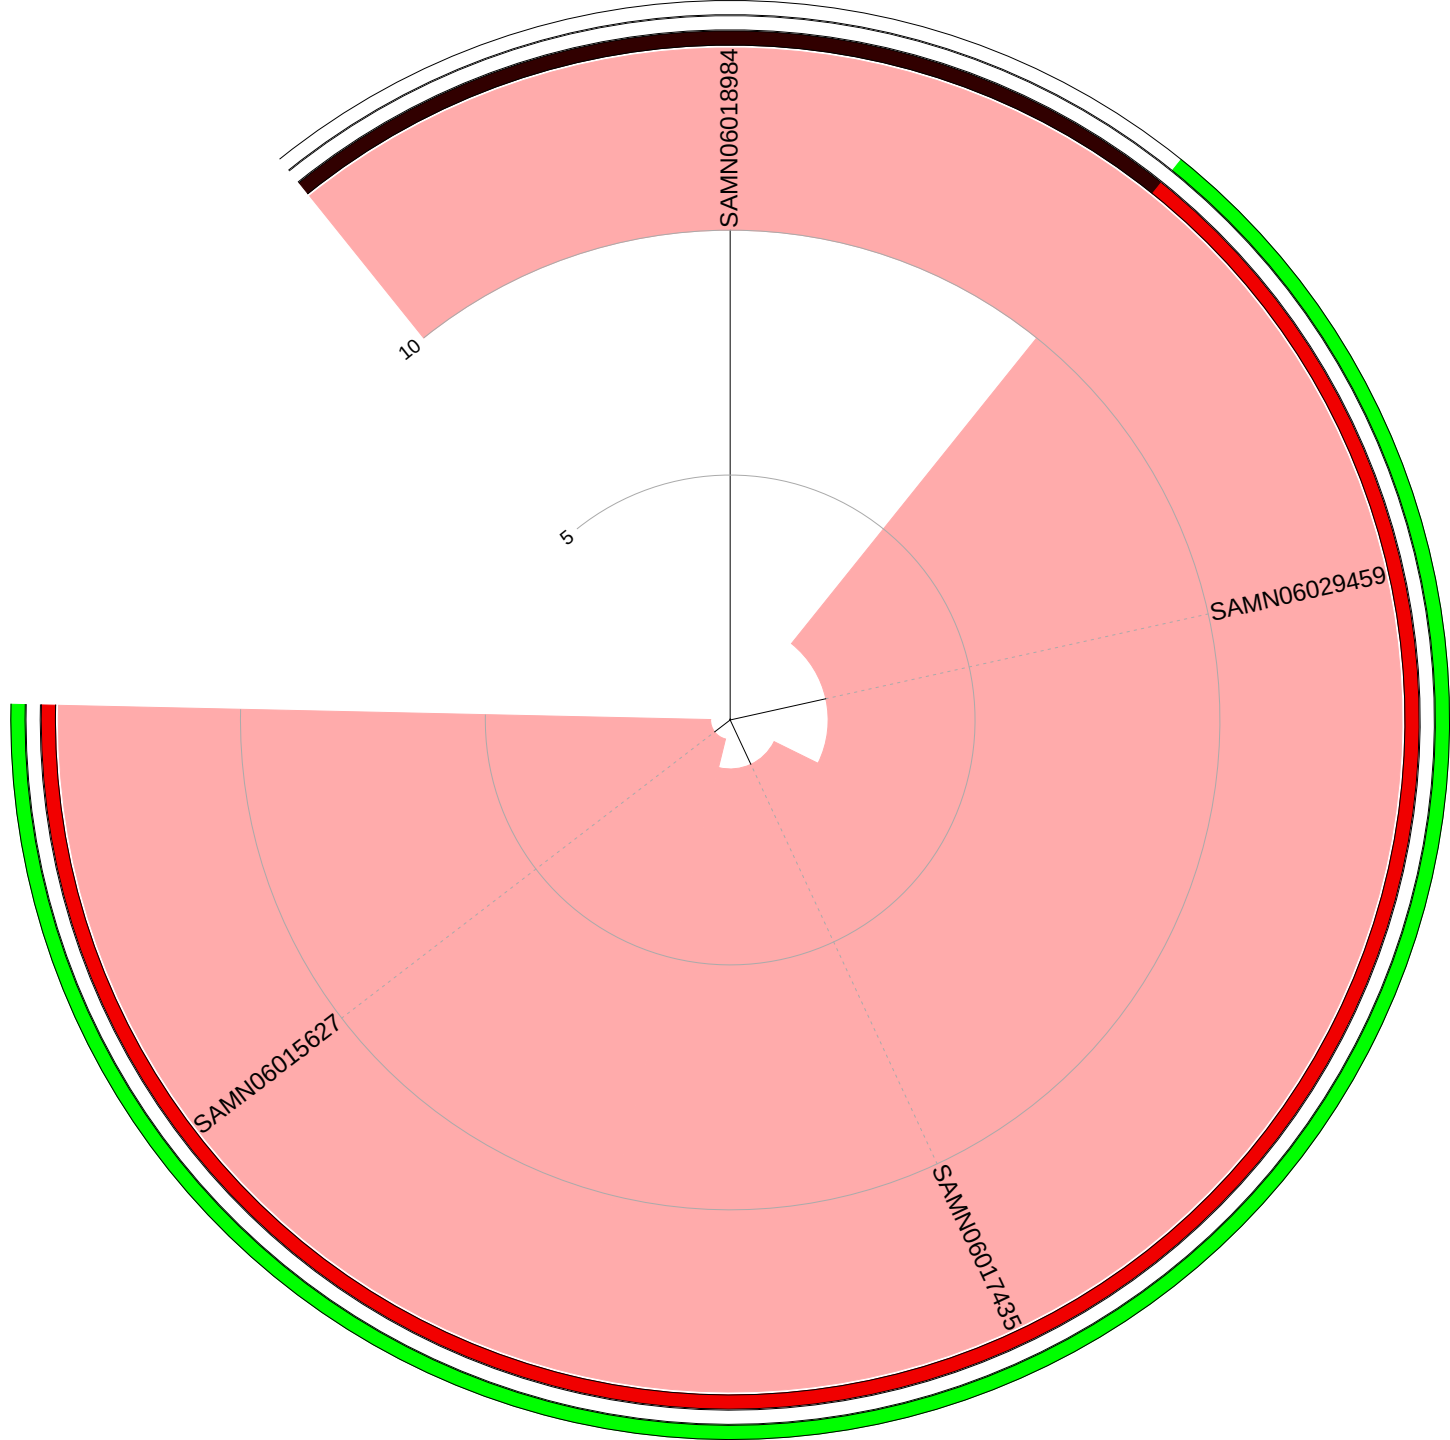

PDS000033669.2

Tree scale: 10

**Country**

United States

United Kingdom

**pMHMC\_004 coverage**

0%

100%

**pMHMC\_004 presence**

pMHMC\_004 presence

**pKSR100 presence**

pKSR100 presence

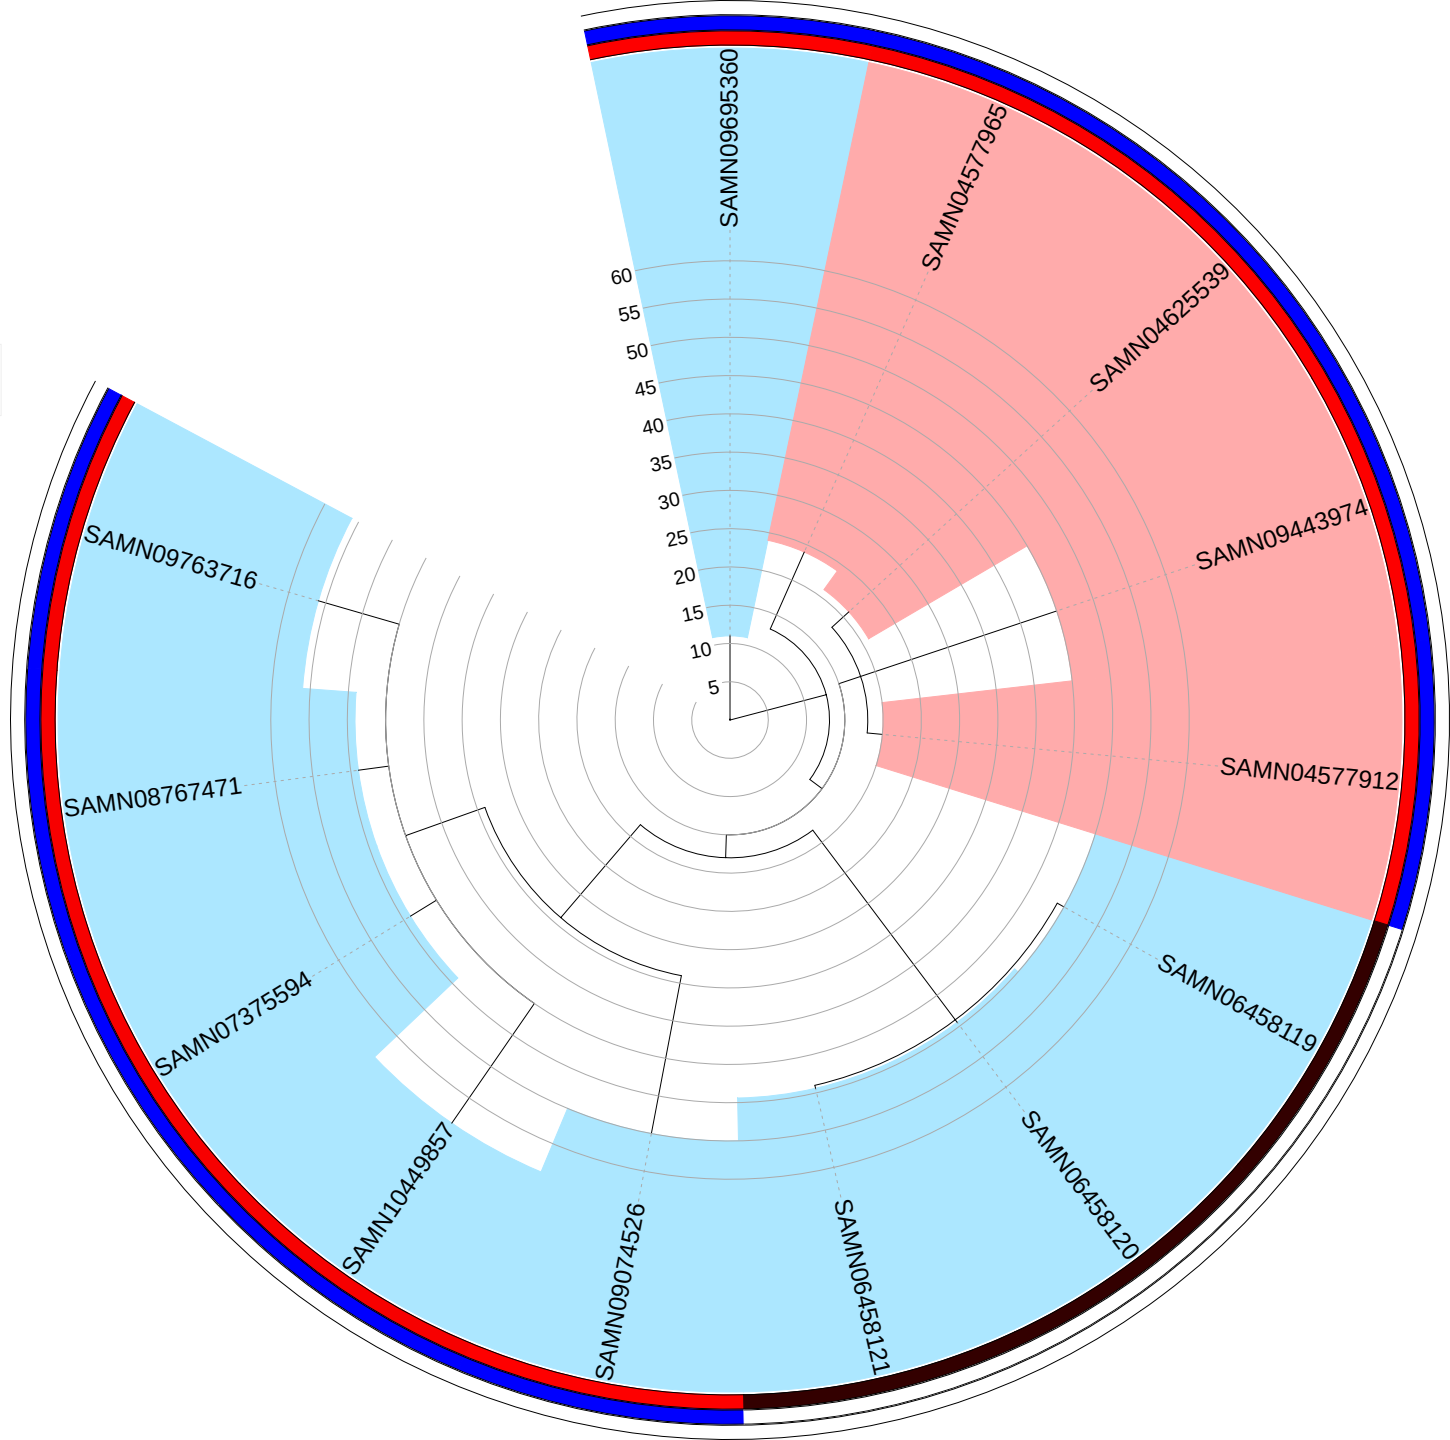

PDS000035106.4



Tree scale: 1

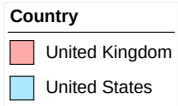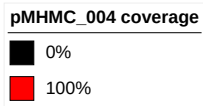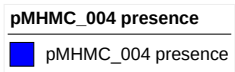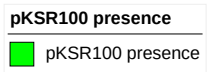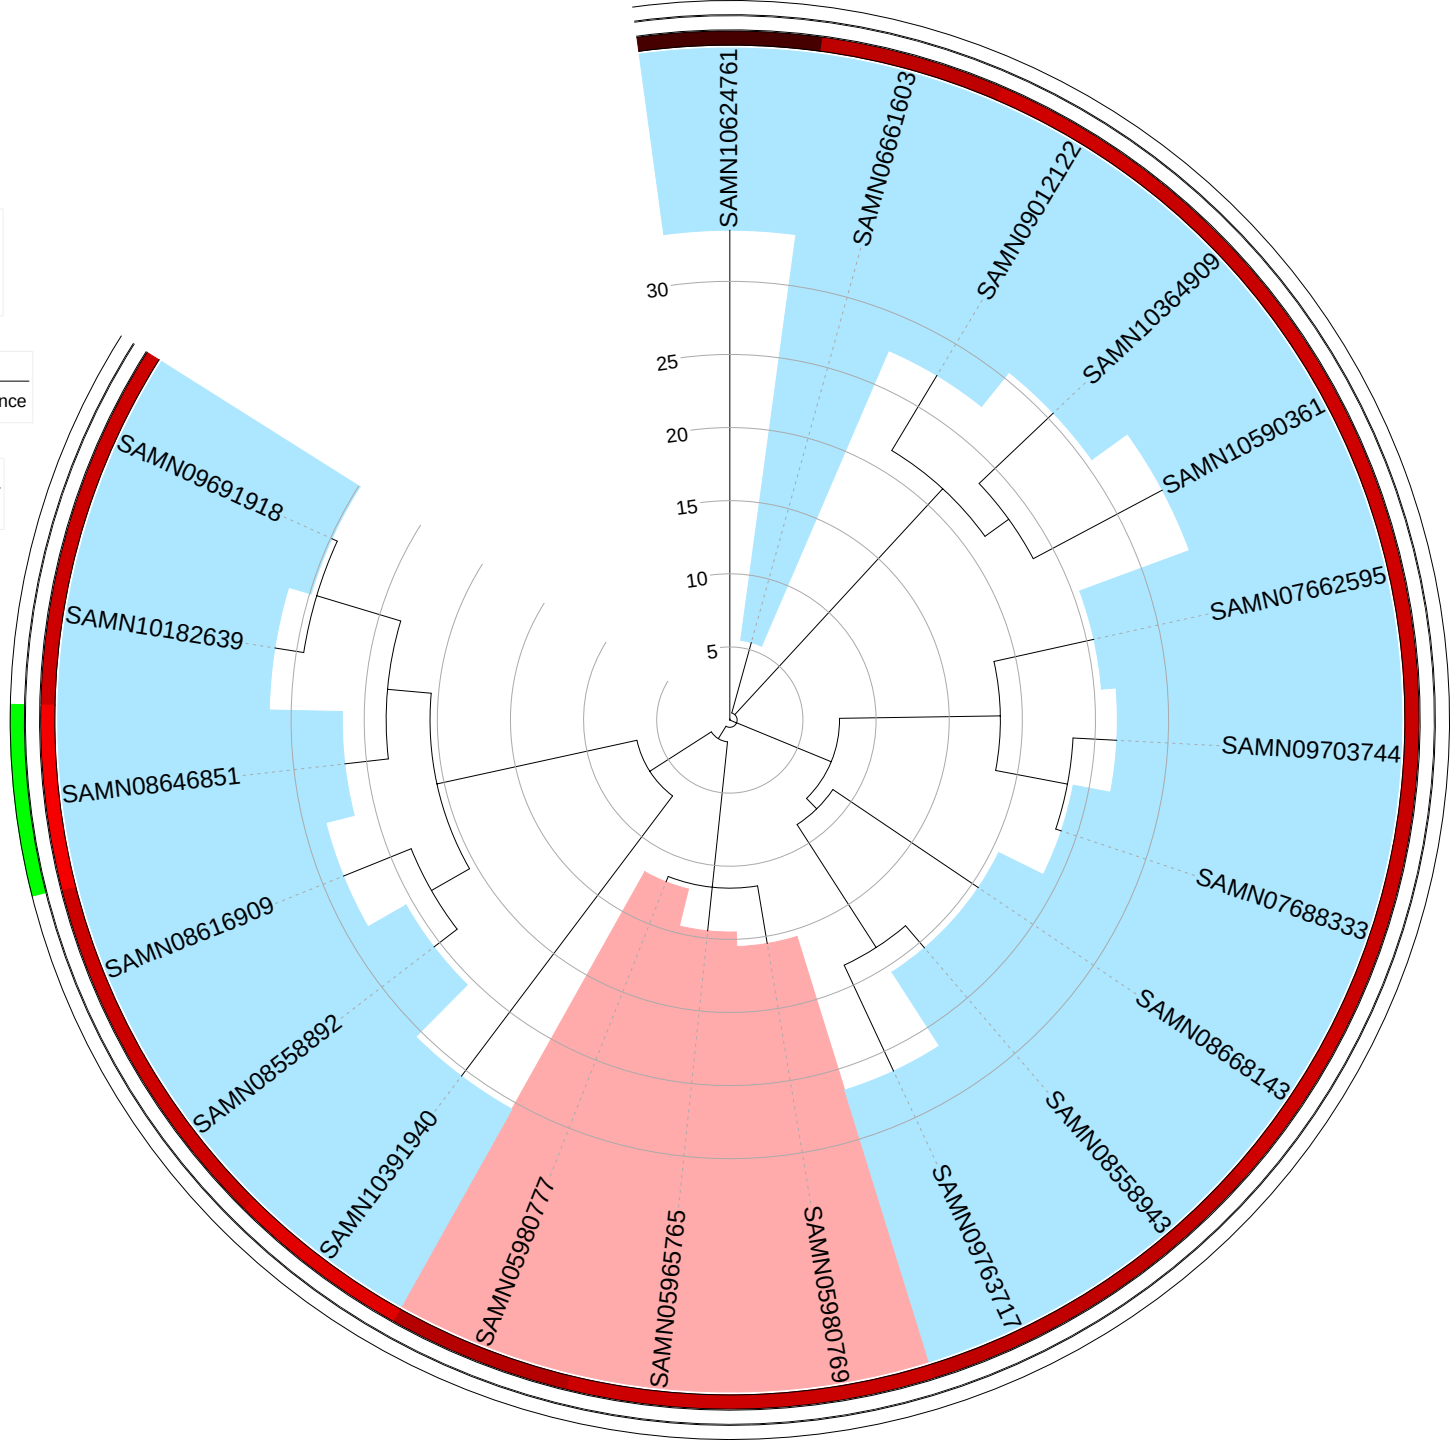

PDS000035107.7

Tree scale: 10

**Country**

- United States
- United Kingdom

**pMHMC\_004 coverage**

- 0%
- 100%

**pMHMC\_004 presence**

- pMHMC\_004 presence

**pKSR100 presence**

- pKSR100 presence

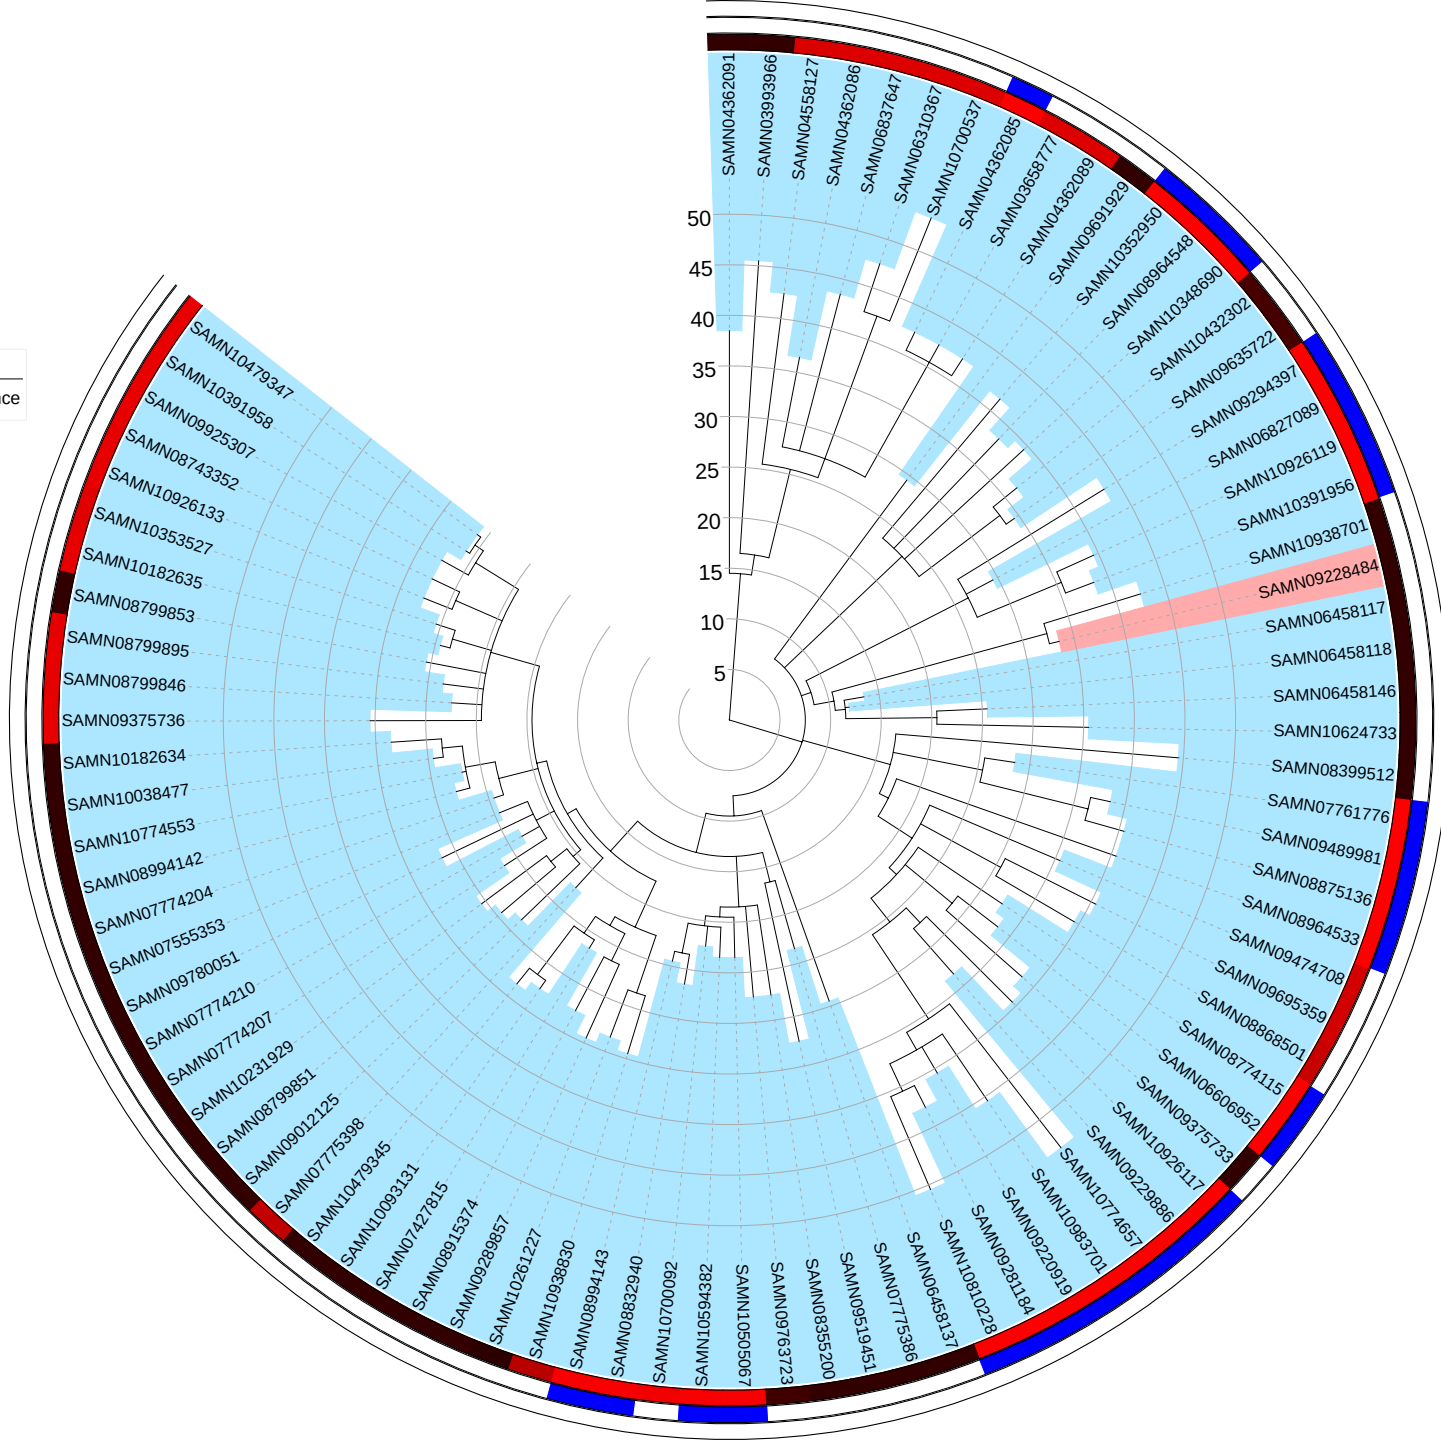

Tree scale: 1

**Country**

United States

United Kingdom

**pMHMC\_004 coverage**

0%

100%

**pMHMC\_004 presence**

pMHMC\_004 presence

**pKSR100 presence**

pKSR100 presence

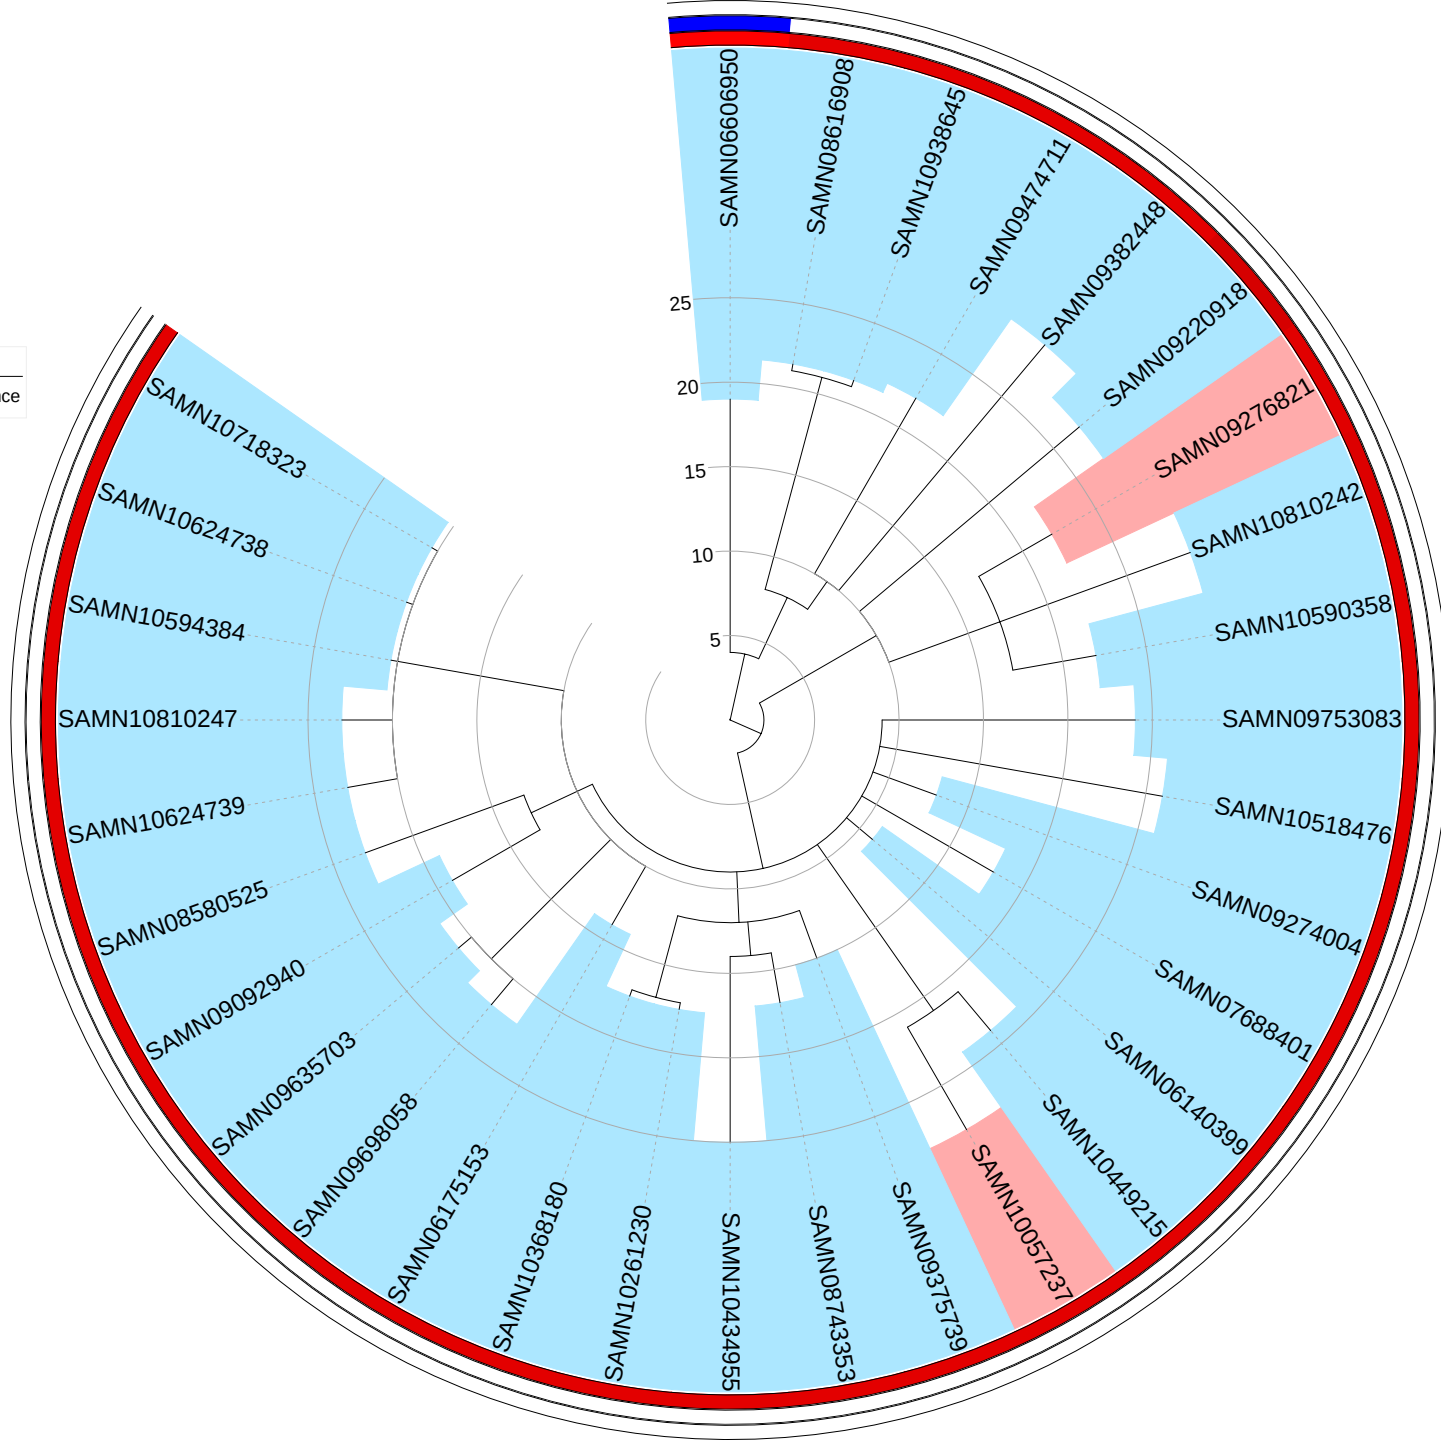

PDS000035123.15

Tree scale: 1

**Country**  
United States

**pMHMC\_004 coverage**  
0%  
100%

**pMHMC\_004 presence**  
pMHMC\_004 presence

**pKSR100 presence**  
pKSR100 presence

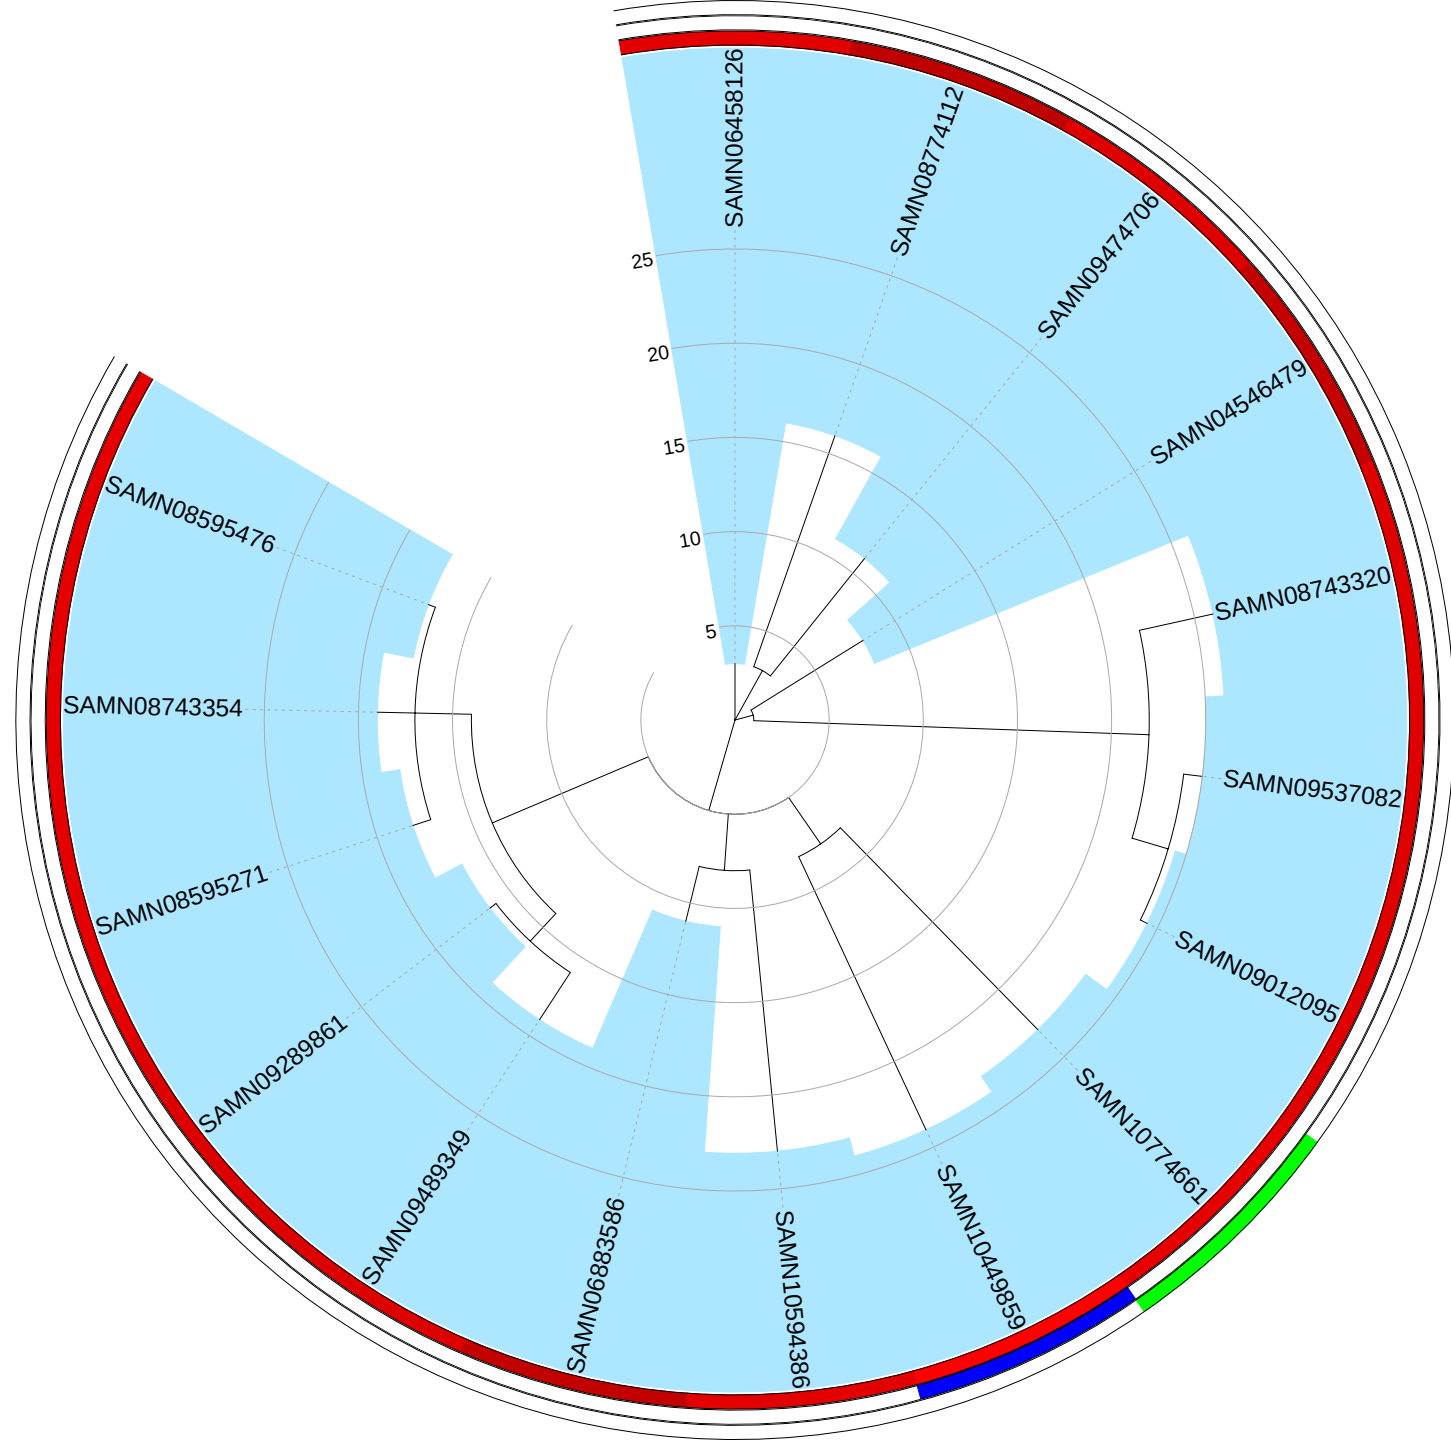

PDS000035124.4

Tree scale: 1 ⇄

**Country**

- United Kingdom
- United States
- Australia

**pMHMC\_004 coverage**

- 0%
- 100%

**pMHMC\_004 presence**

- pMHMC\_004 presence

**pKSR100 presence**

- pKSR100 presence

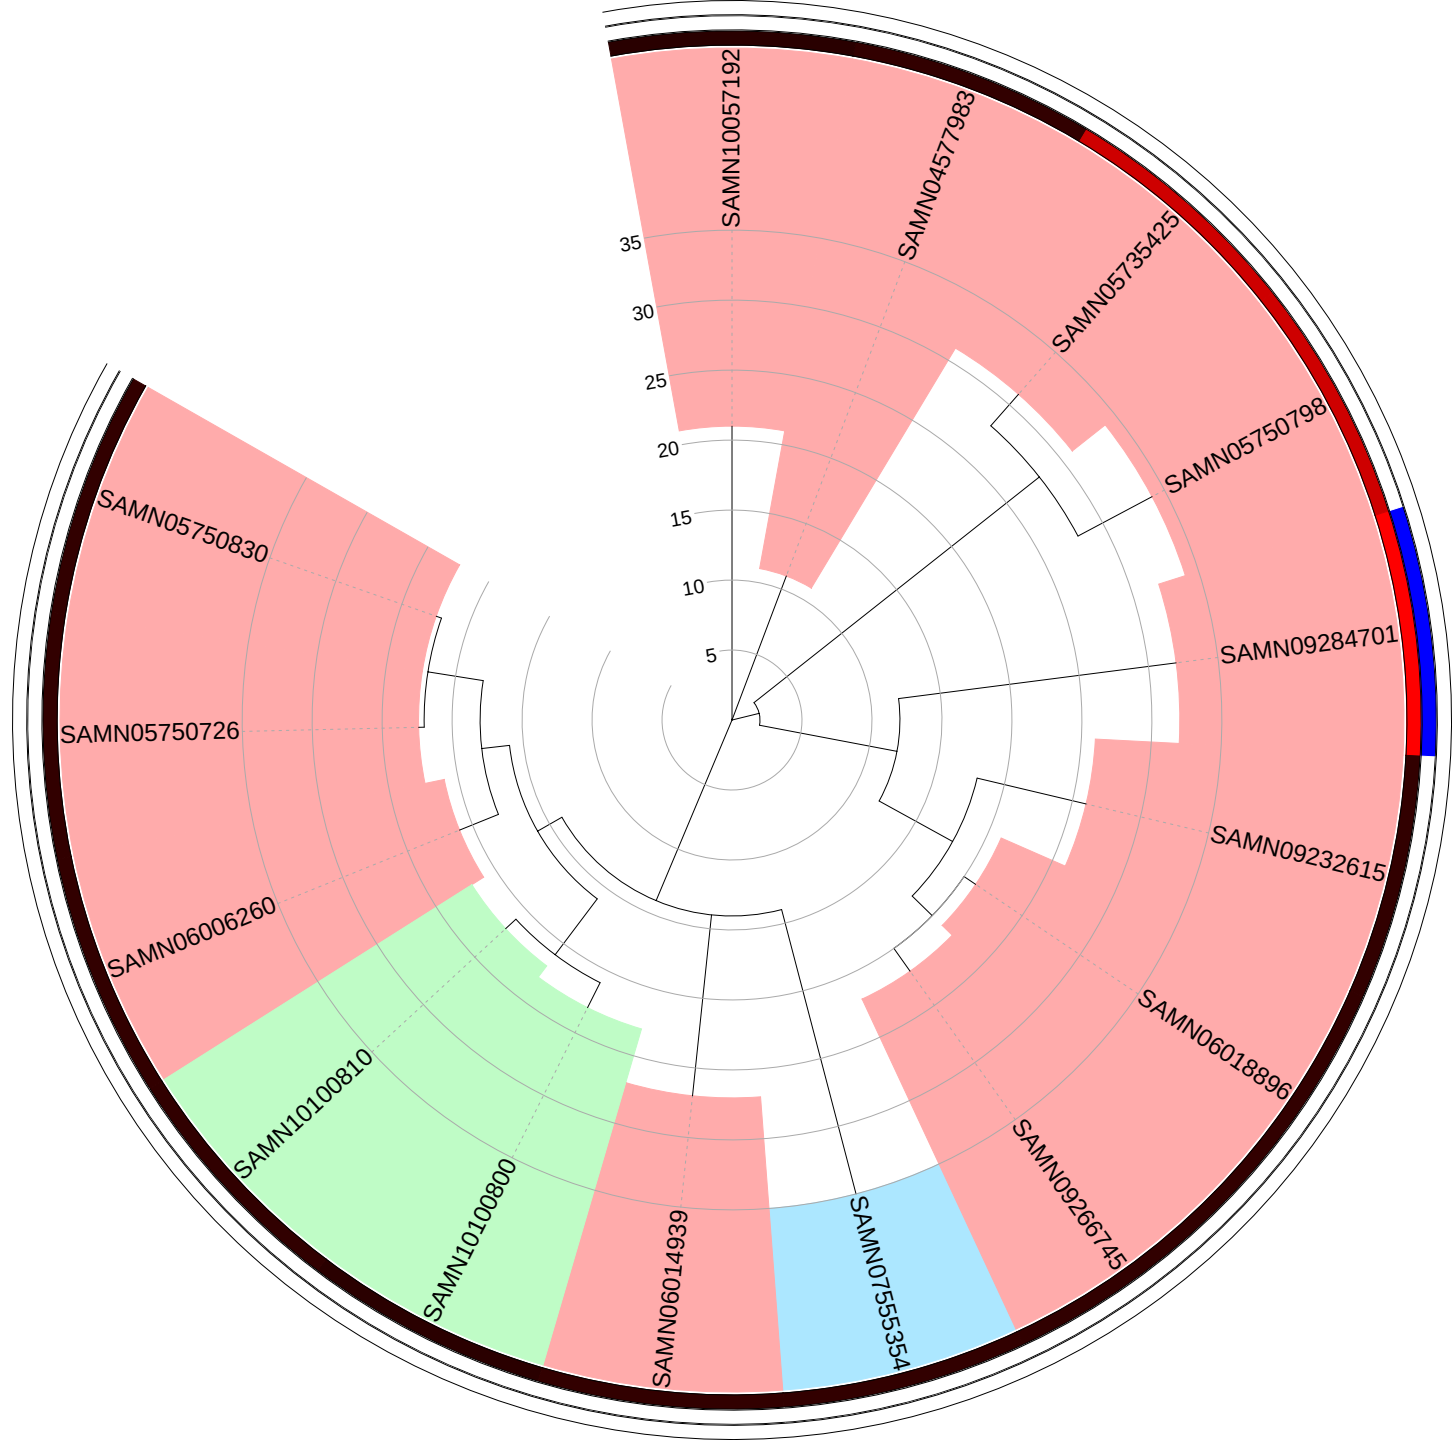

PDS000035178.4



Tree scale: 10

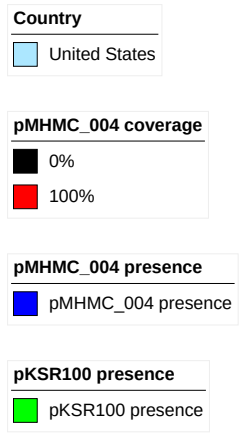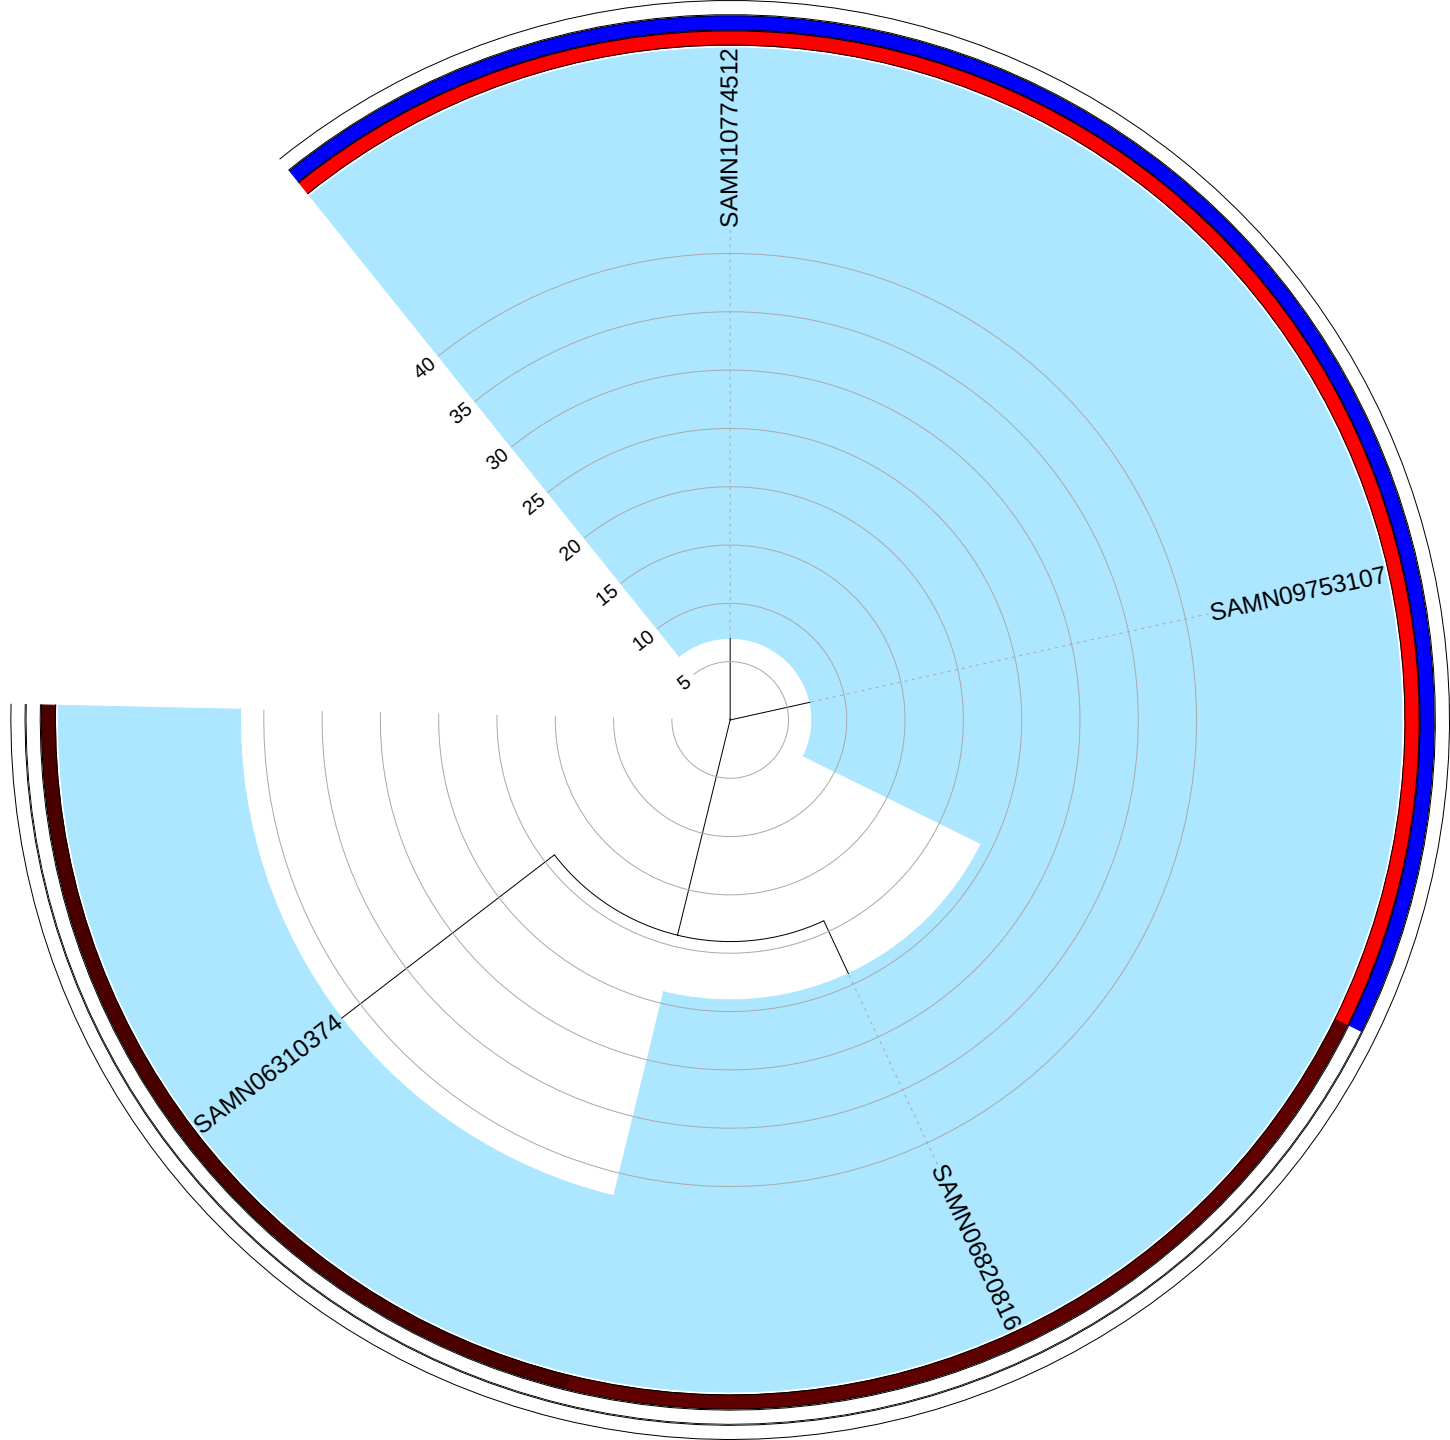

PDS000035185.2

Tree scale: 1

**Country**

United States

**pMHMC\_004 coverage**

0%

100%

**pMHMC\_004 presence**

pMHMC\_004 presence

**pKSR100 presence**

pKSR100 presence

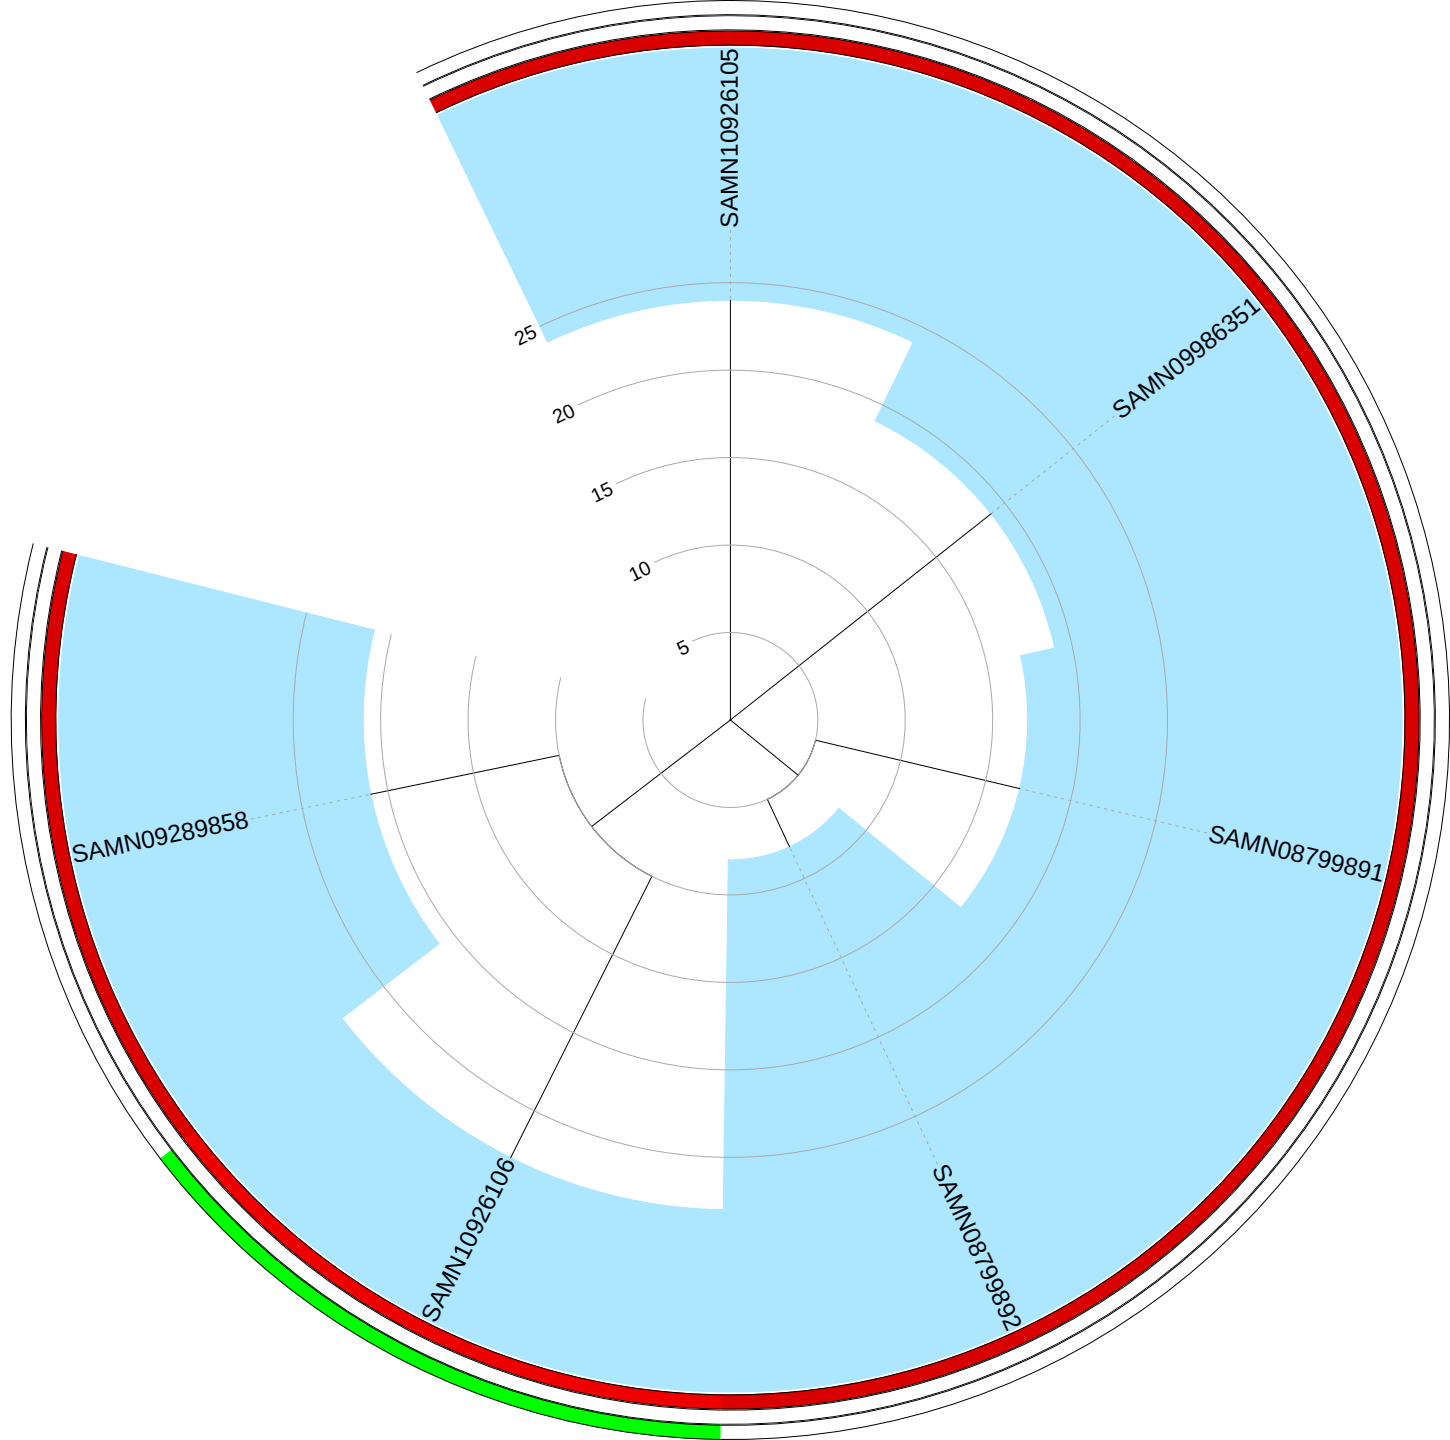

PDS000035186.3

**Country**

- United Kingdom
- Other or none
- United States
- Australia

**pMHMC\_004 coverage**

- 0%
- 100%

**pMHMC\_004 presence**

- pMHMC\_004 presence

**pKSR100 presence**

- pKSR100 presence

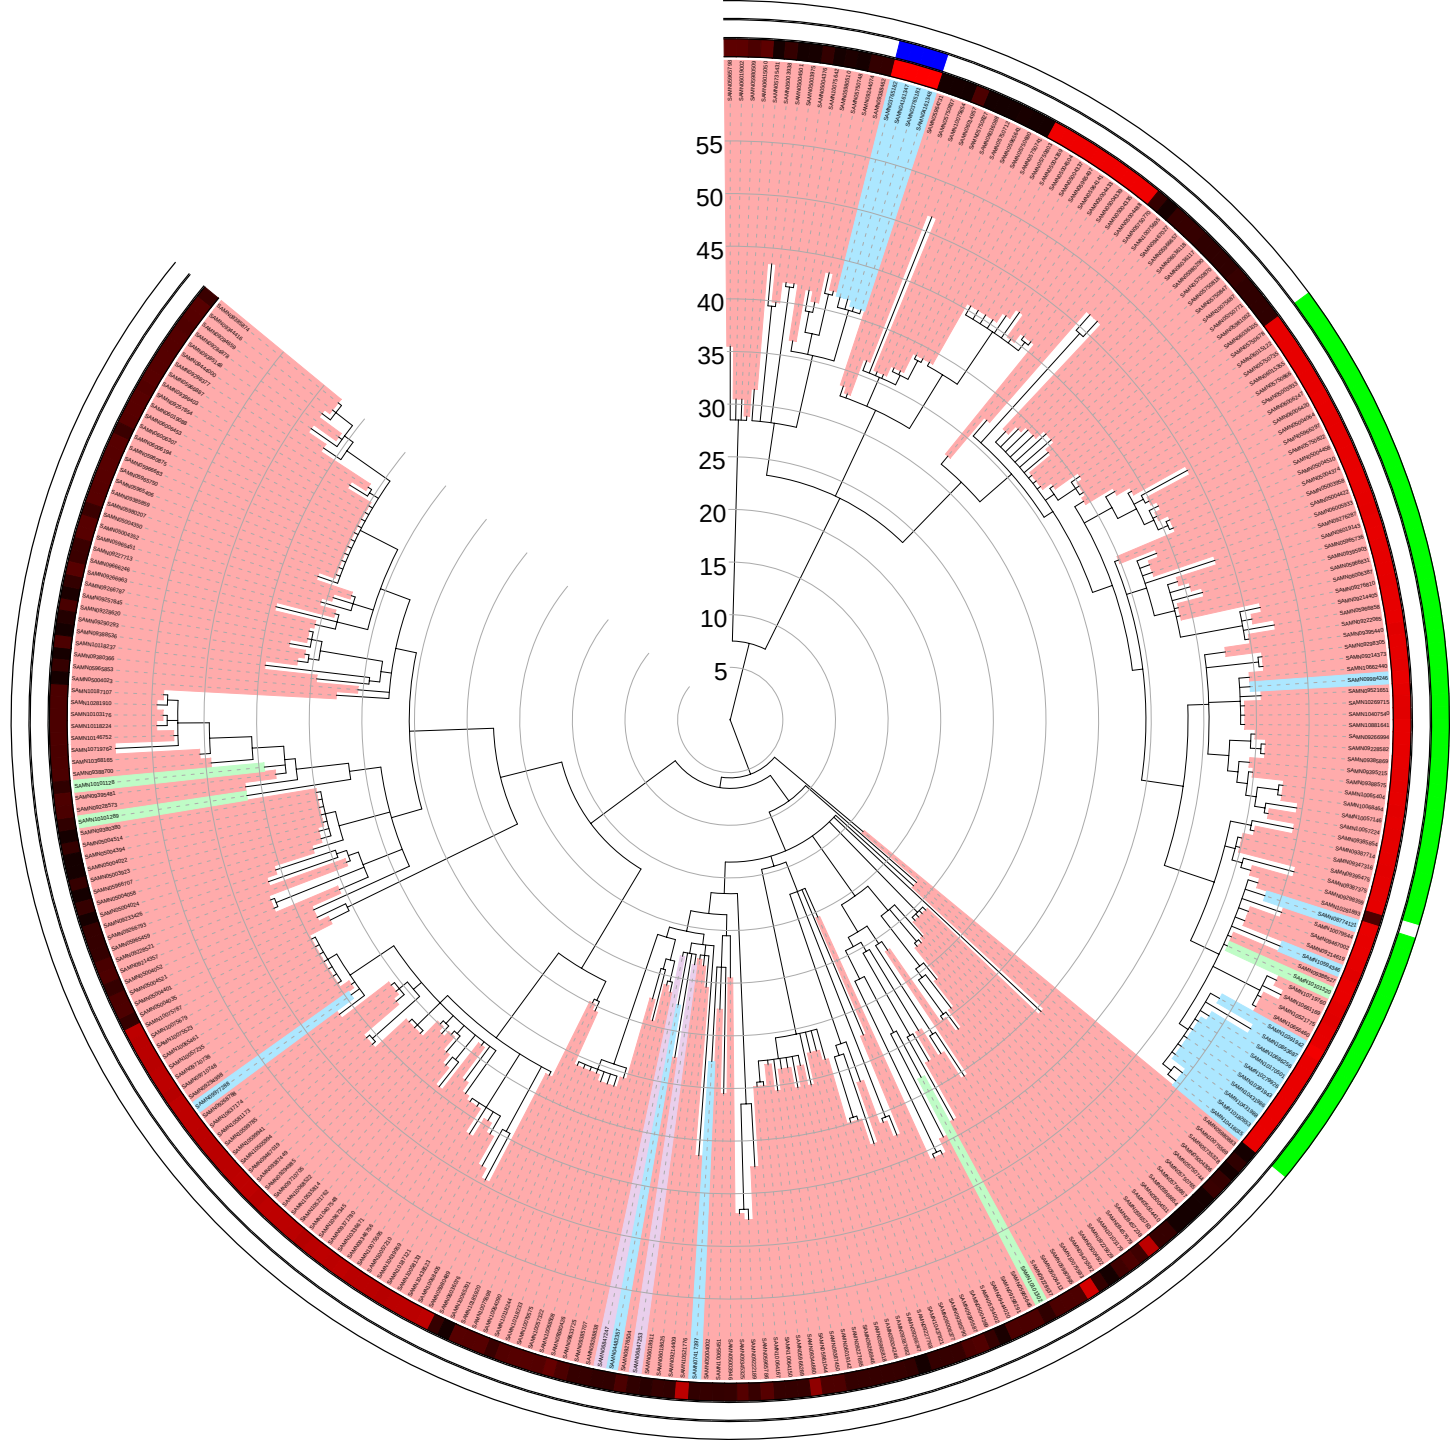

Tree scale: 1

**Country**

- United Kingdom
- United States

**pMHMC\_004 coverage**

- 0%
- 100%

**pMHMC\_004 presence**

- pMHMC\_004 presence

**pKSR100 presence**

- pKSR100 presence

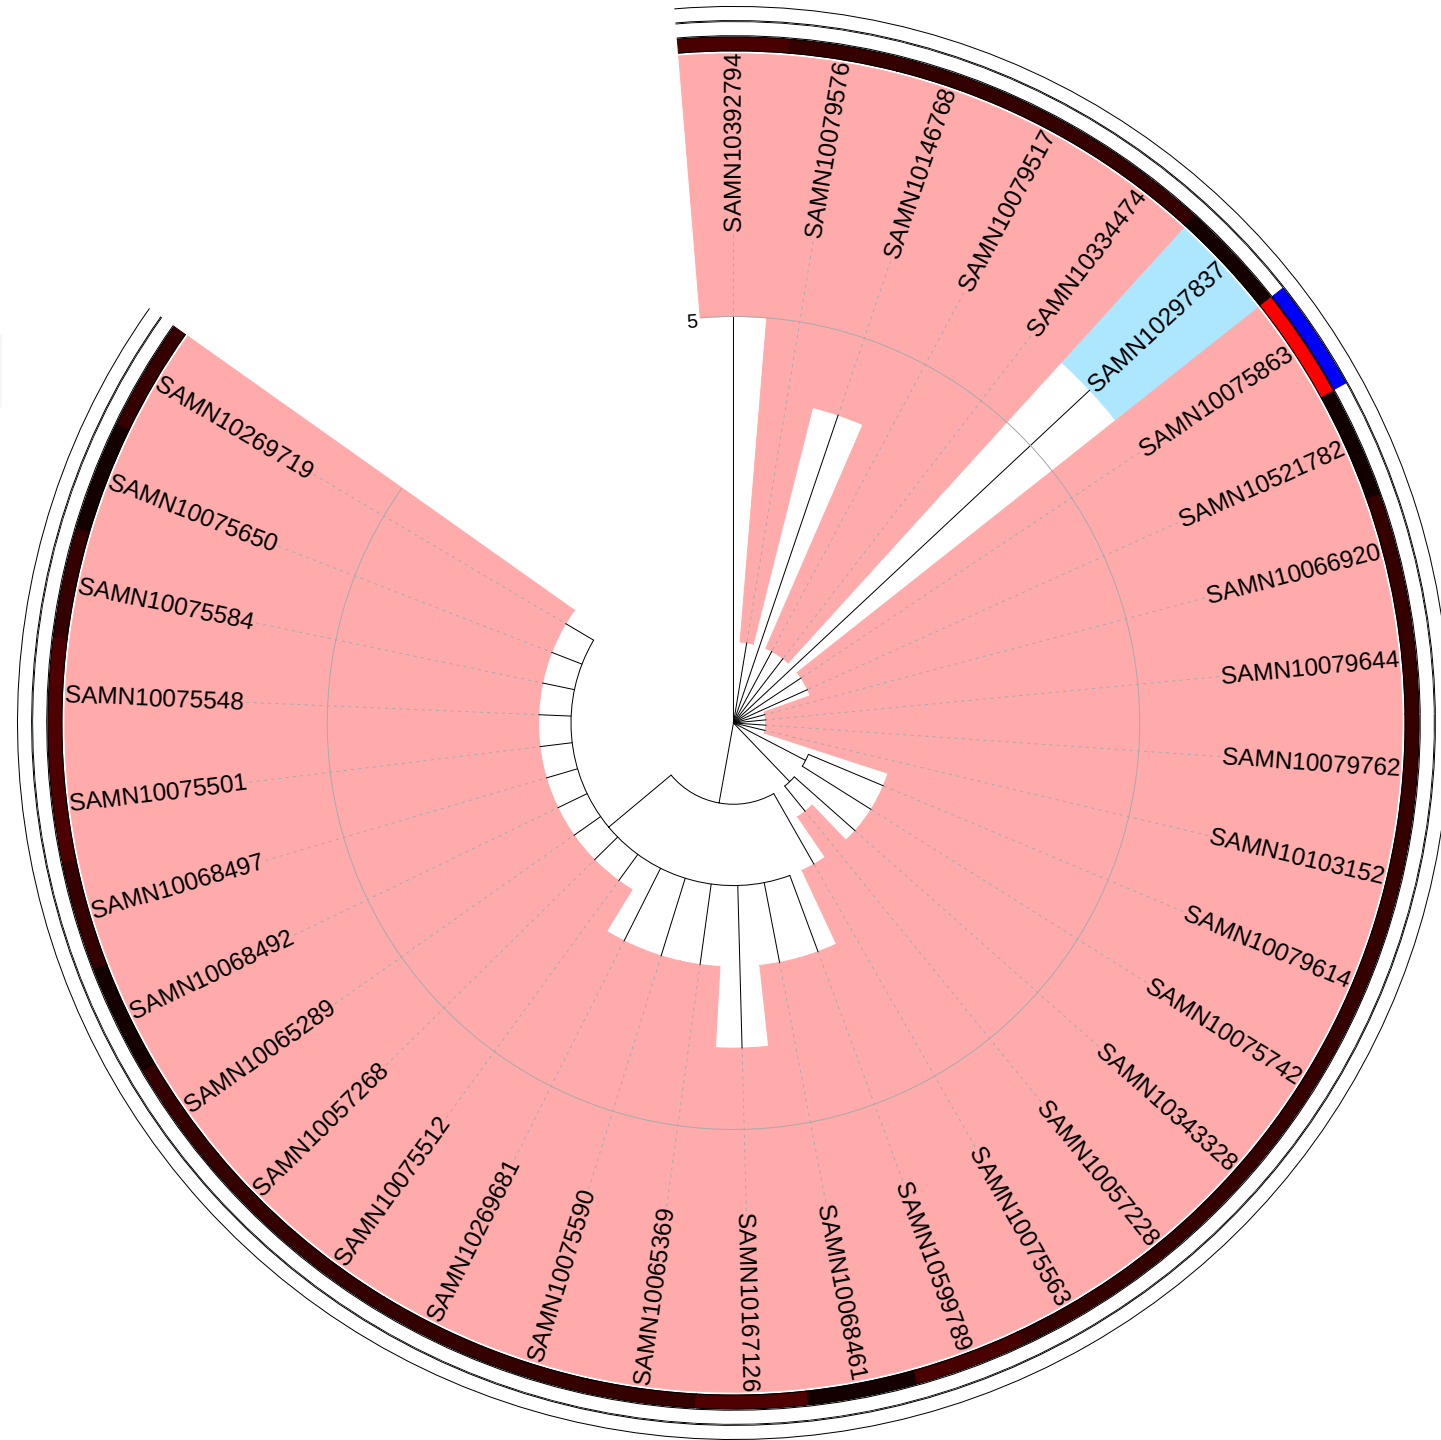

PDS000036659.15

Tree scale: 1

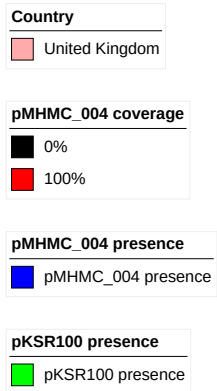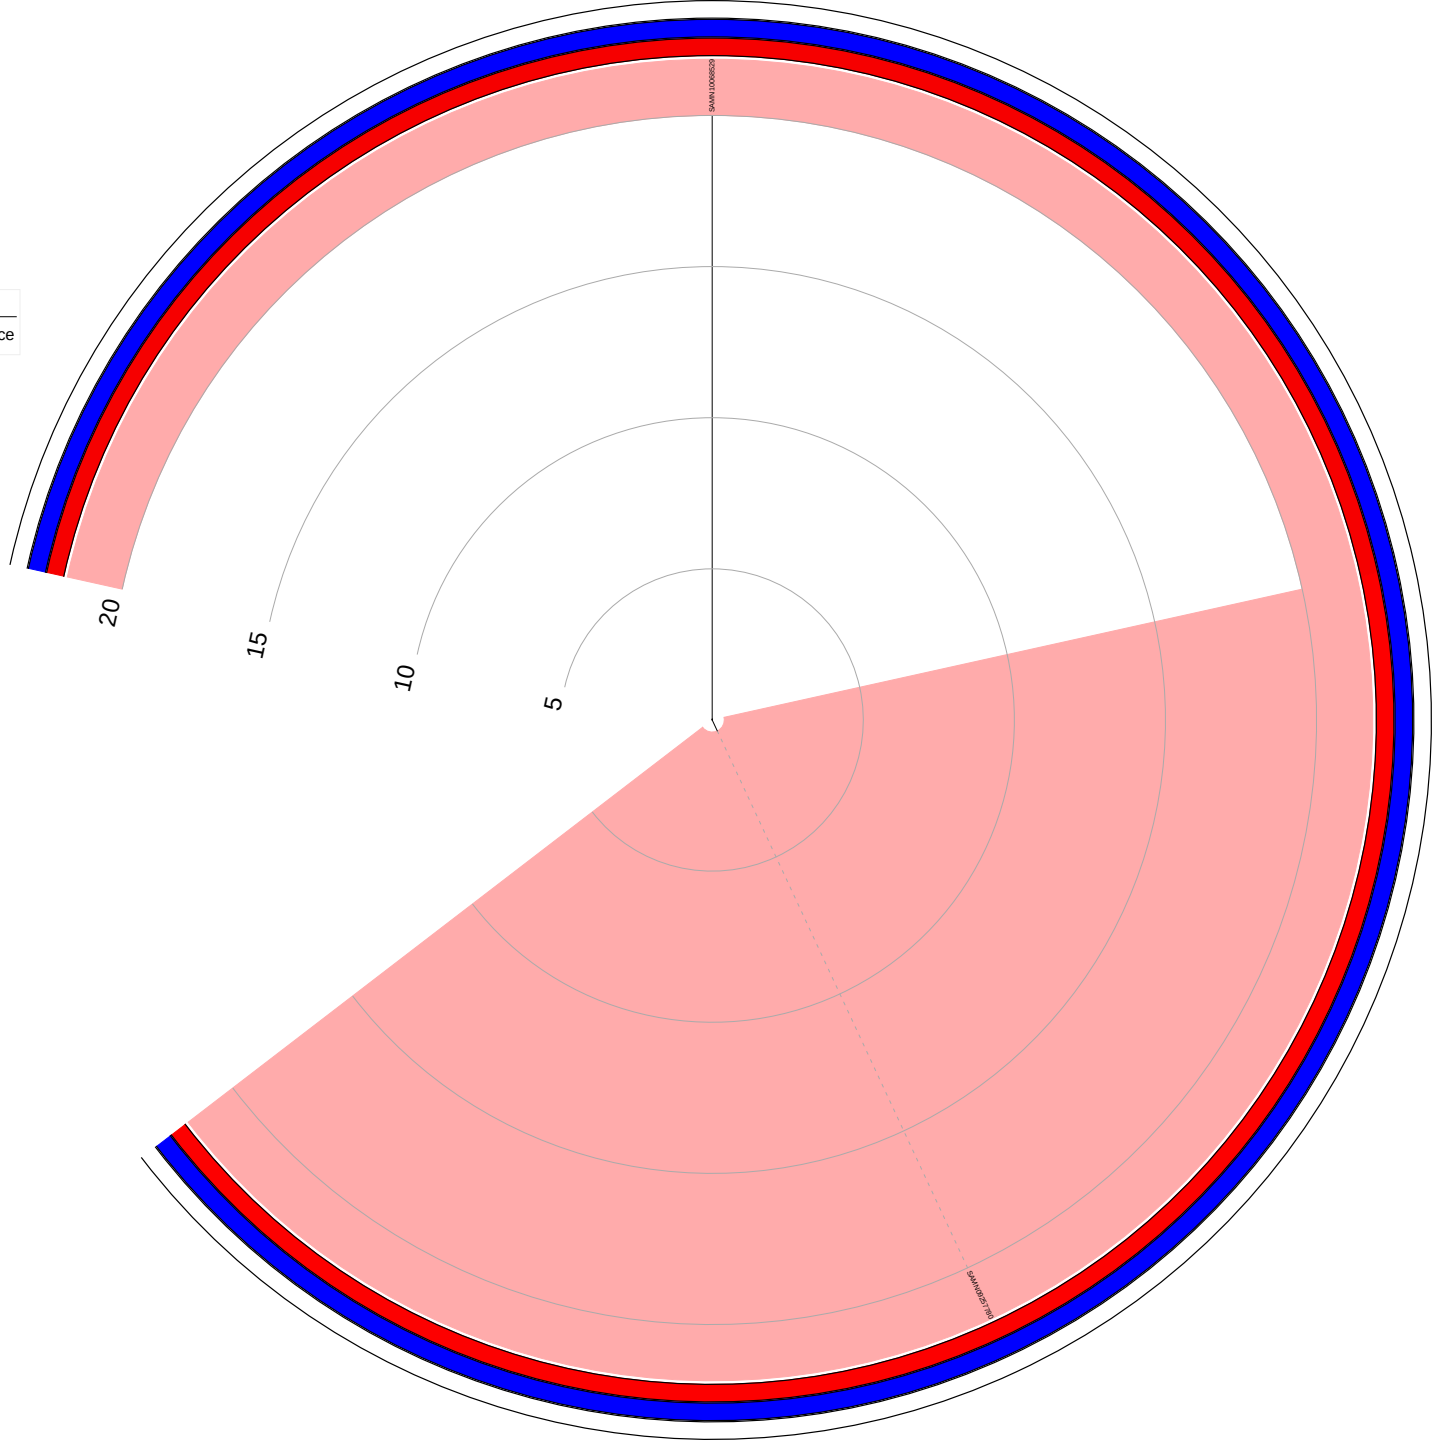

PDS000036728.1



Tree scale: 1

**Country**

United Kingdom

**pMHMC\_004 coverage**

0%

100%

**pMHMC\_004 presence**

pMHMC\_004 presence

**pKSR100 presence**

pKSR100 presence

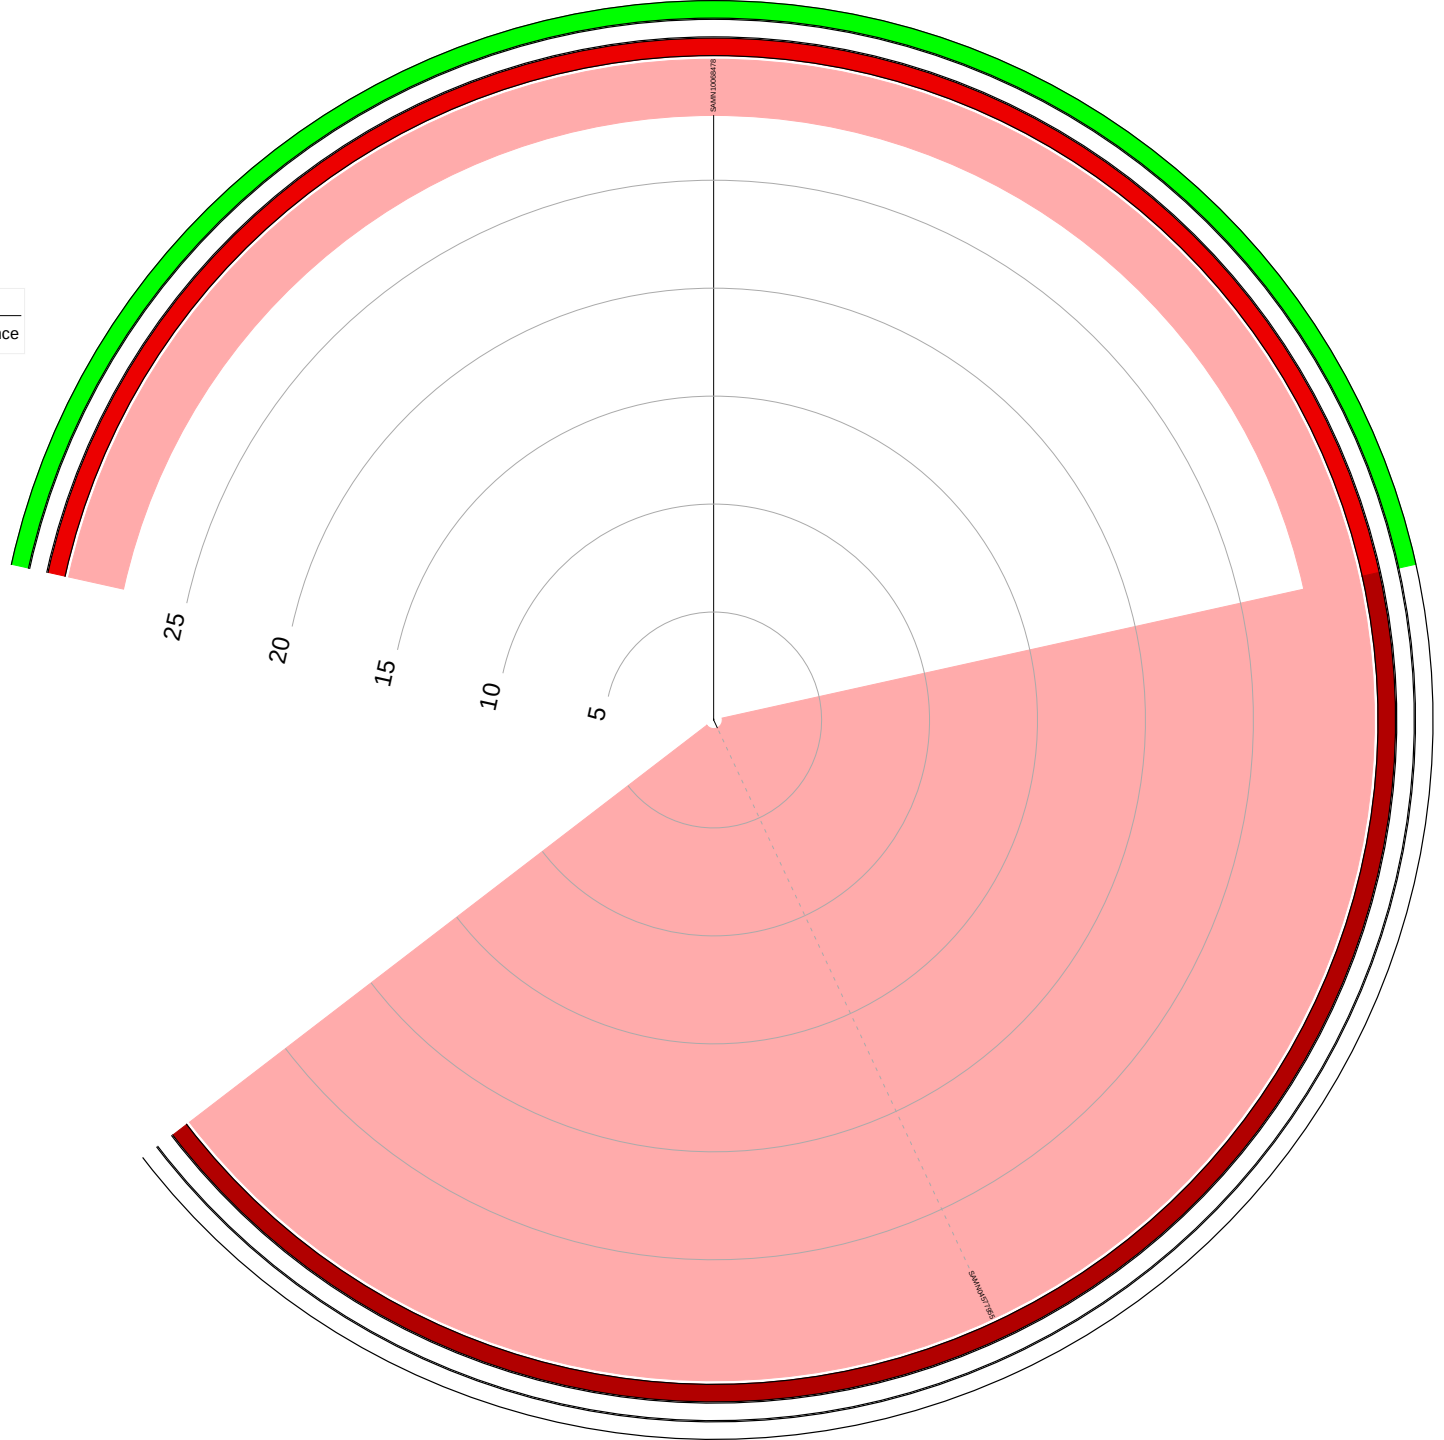

PDS000036730.1

Tree scale: 1

**Country**

United States

**pMHMC\_004 coverage**

0%

100%

**pMHMC\_004 presence**

pMHMC\_004 presence

**pKSR100 presence**

pKSR100 presence

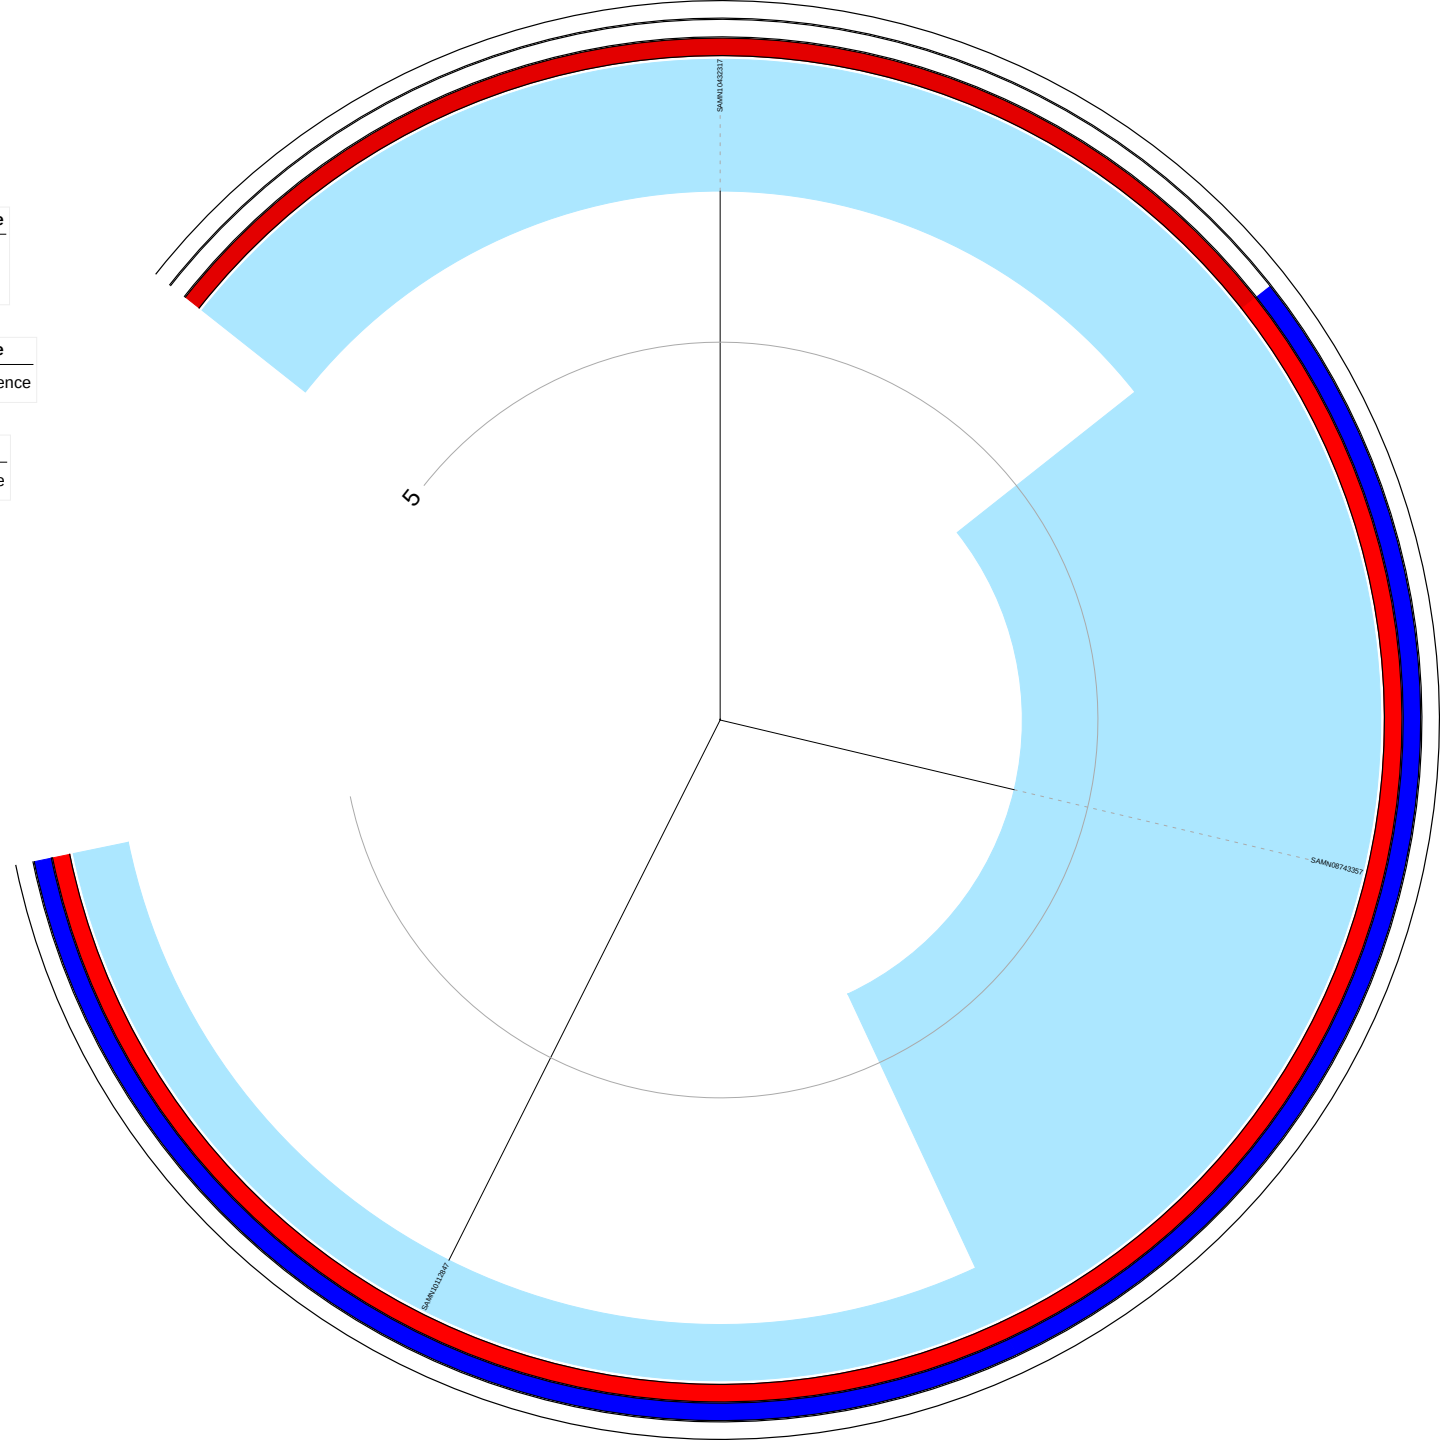

PDS000037165.2

Tree scale: 1

**Country**

United States

**pMHC\_004 coverage**

0%

100%

**pMHC\_004 presence**

pMHC\_004 presence

**pKSR100 presence**

pKSR100 presence

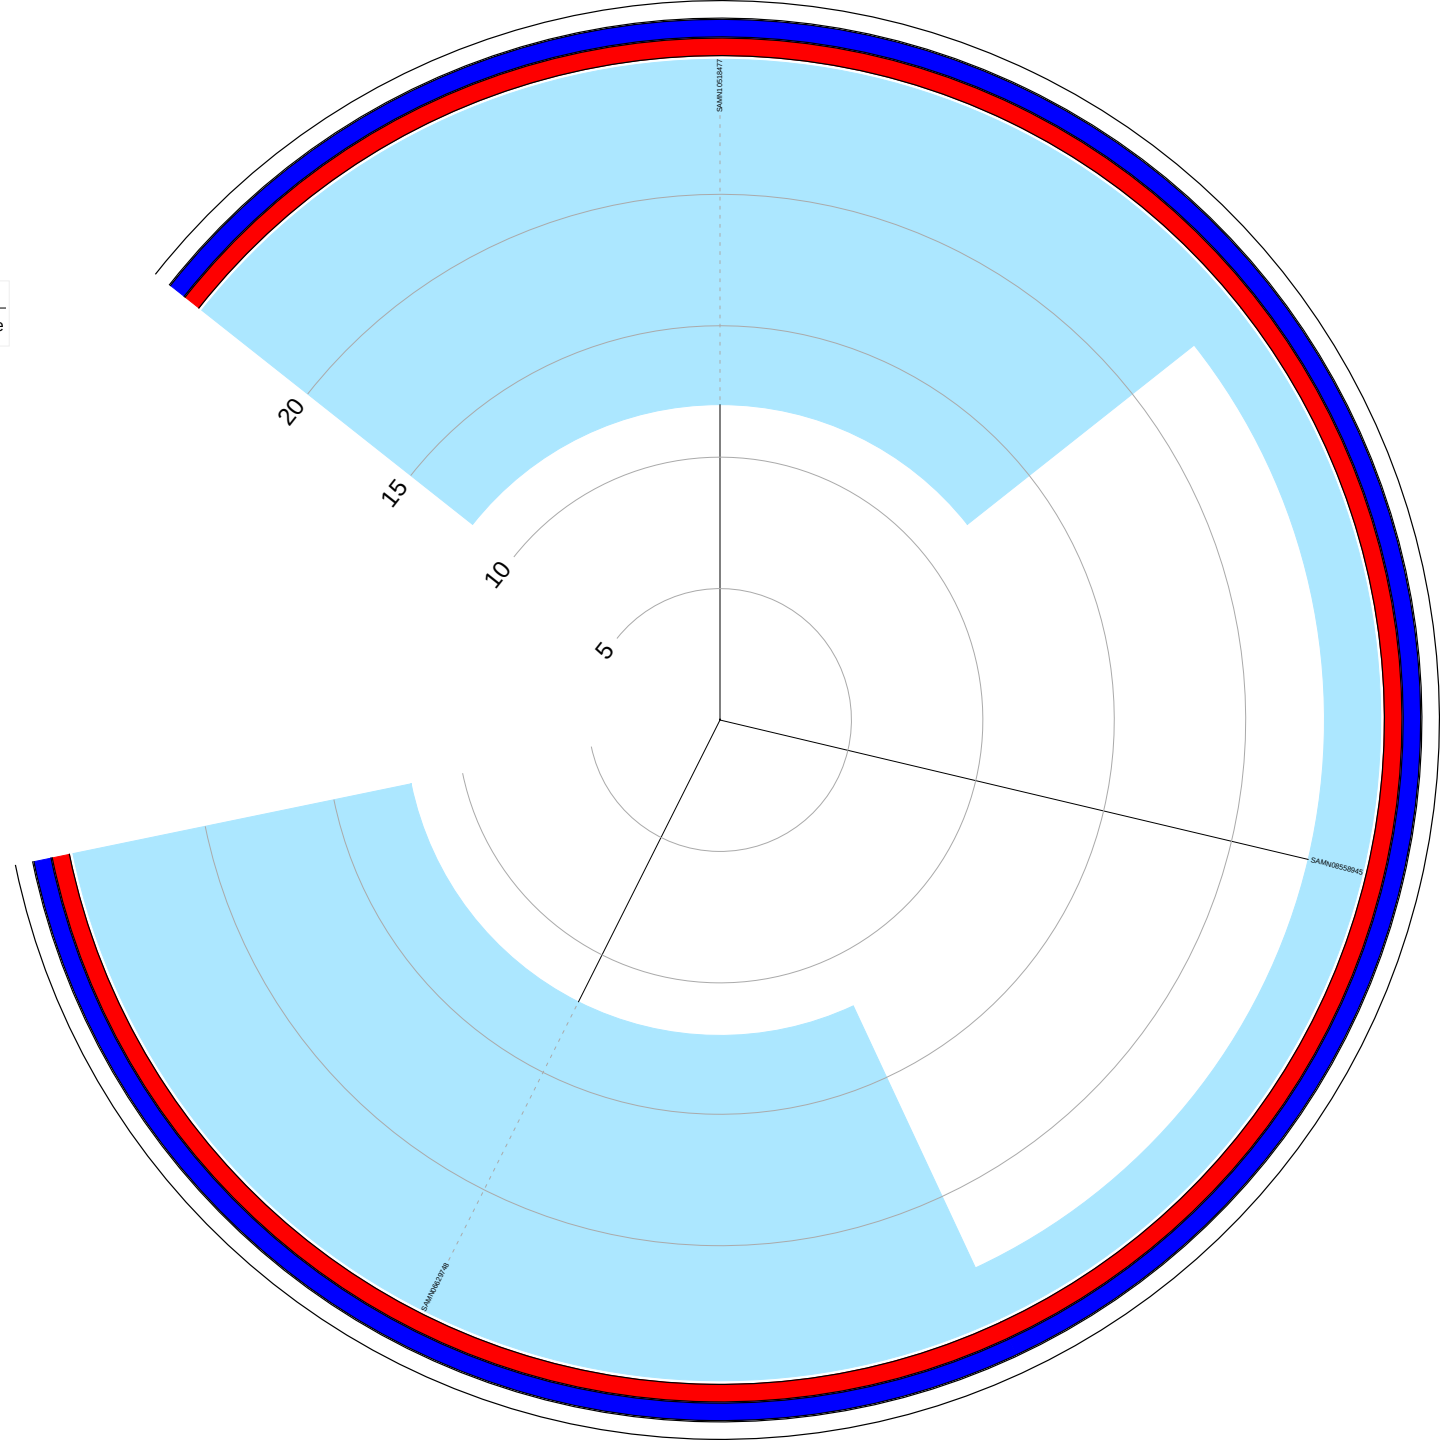

PDS000039050.1

**Country**  
United States

**pMHMC\_004 coverage**  
0%  
100%

**pMHMC\_004 presence**  
pMHMC\_004 presence

**pKSR100 presence**  
pKSR100 presence

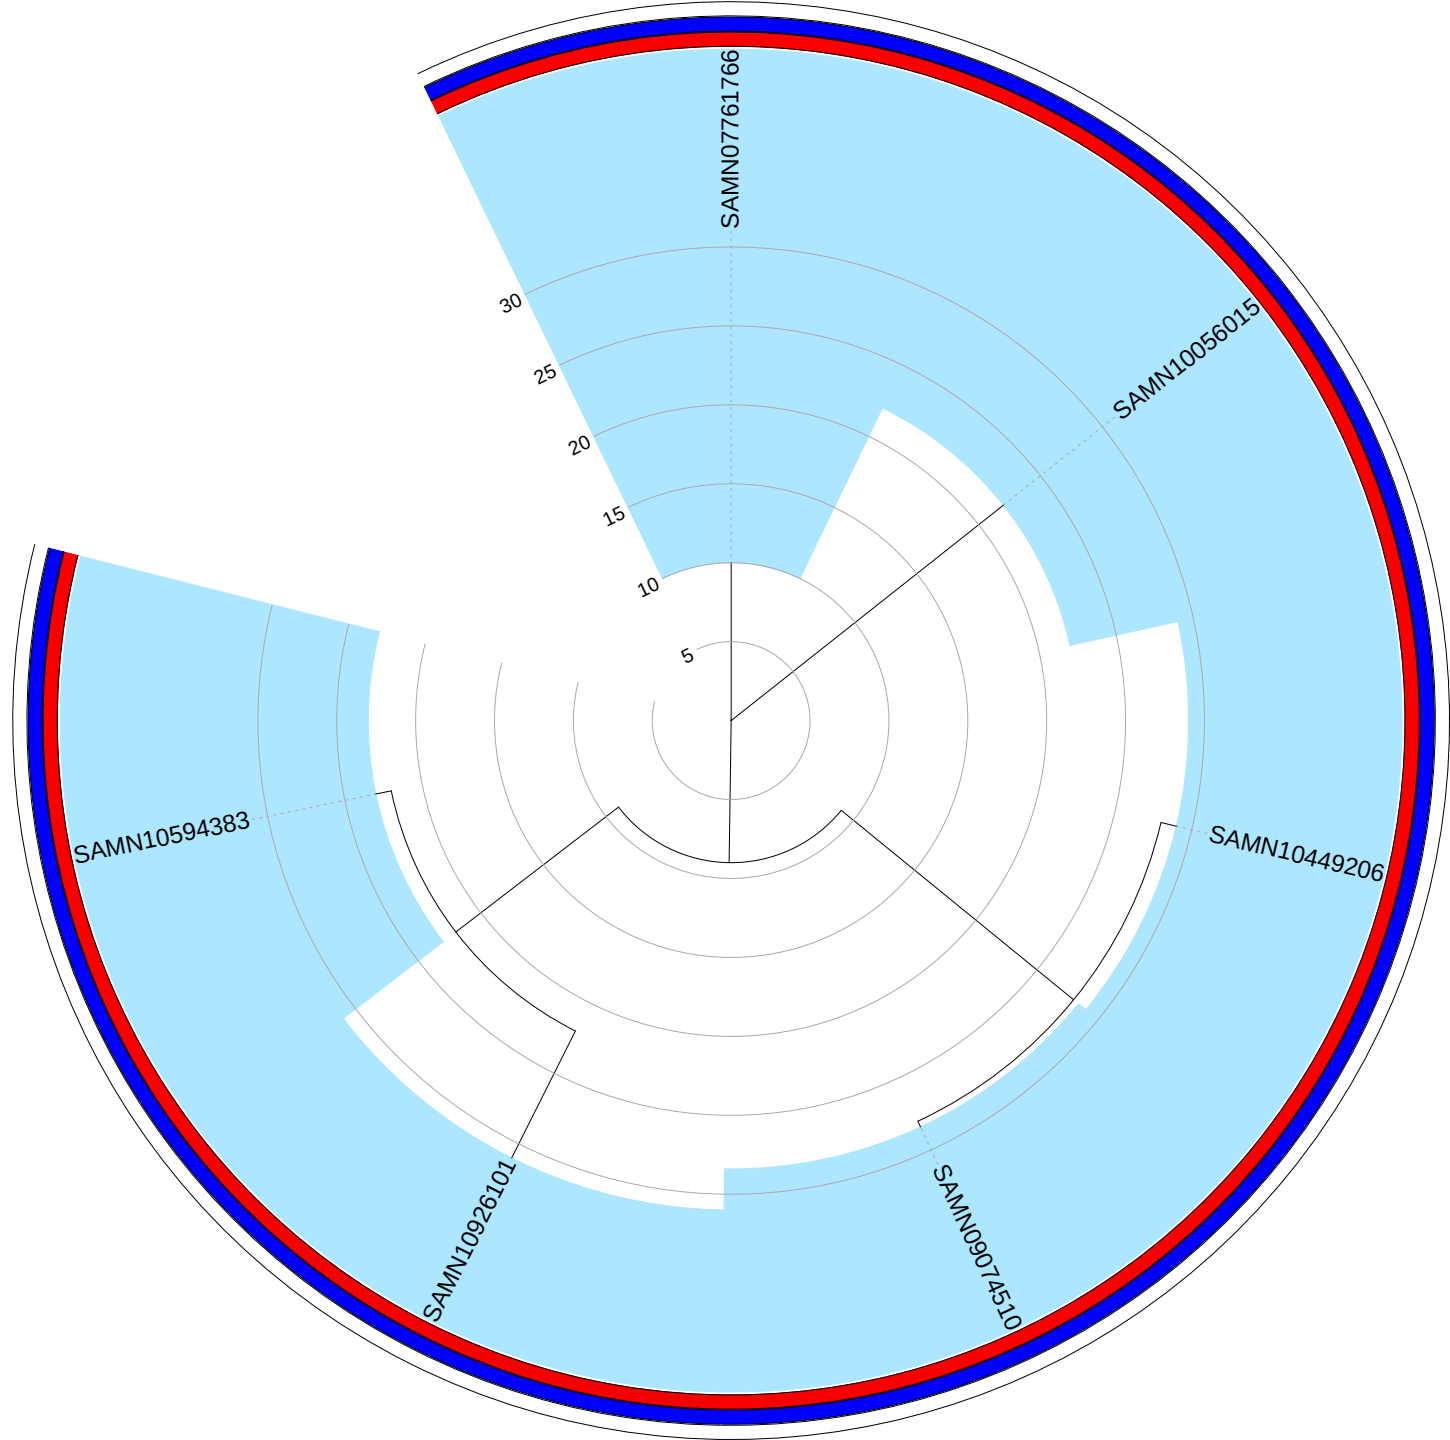

Tree scale: 1

Country

Other or none

pMHC\_004 coverage

0%

100%

pMHC\_004 presence

pMHC\_004 presence

pKSR100 presence

pKSR100 presence

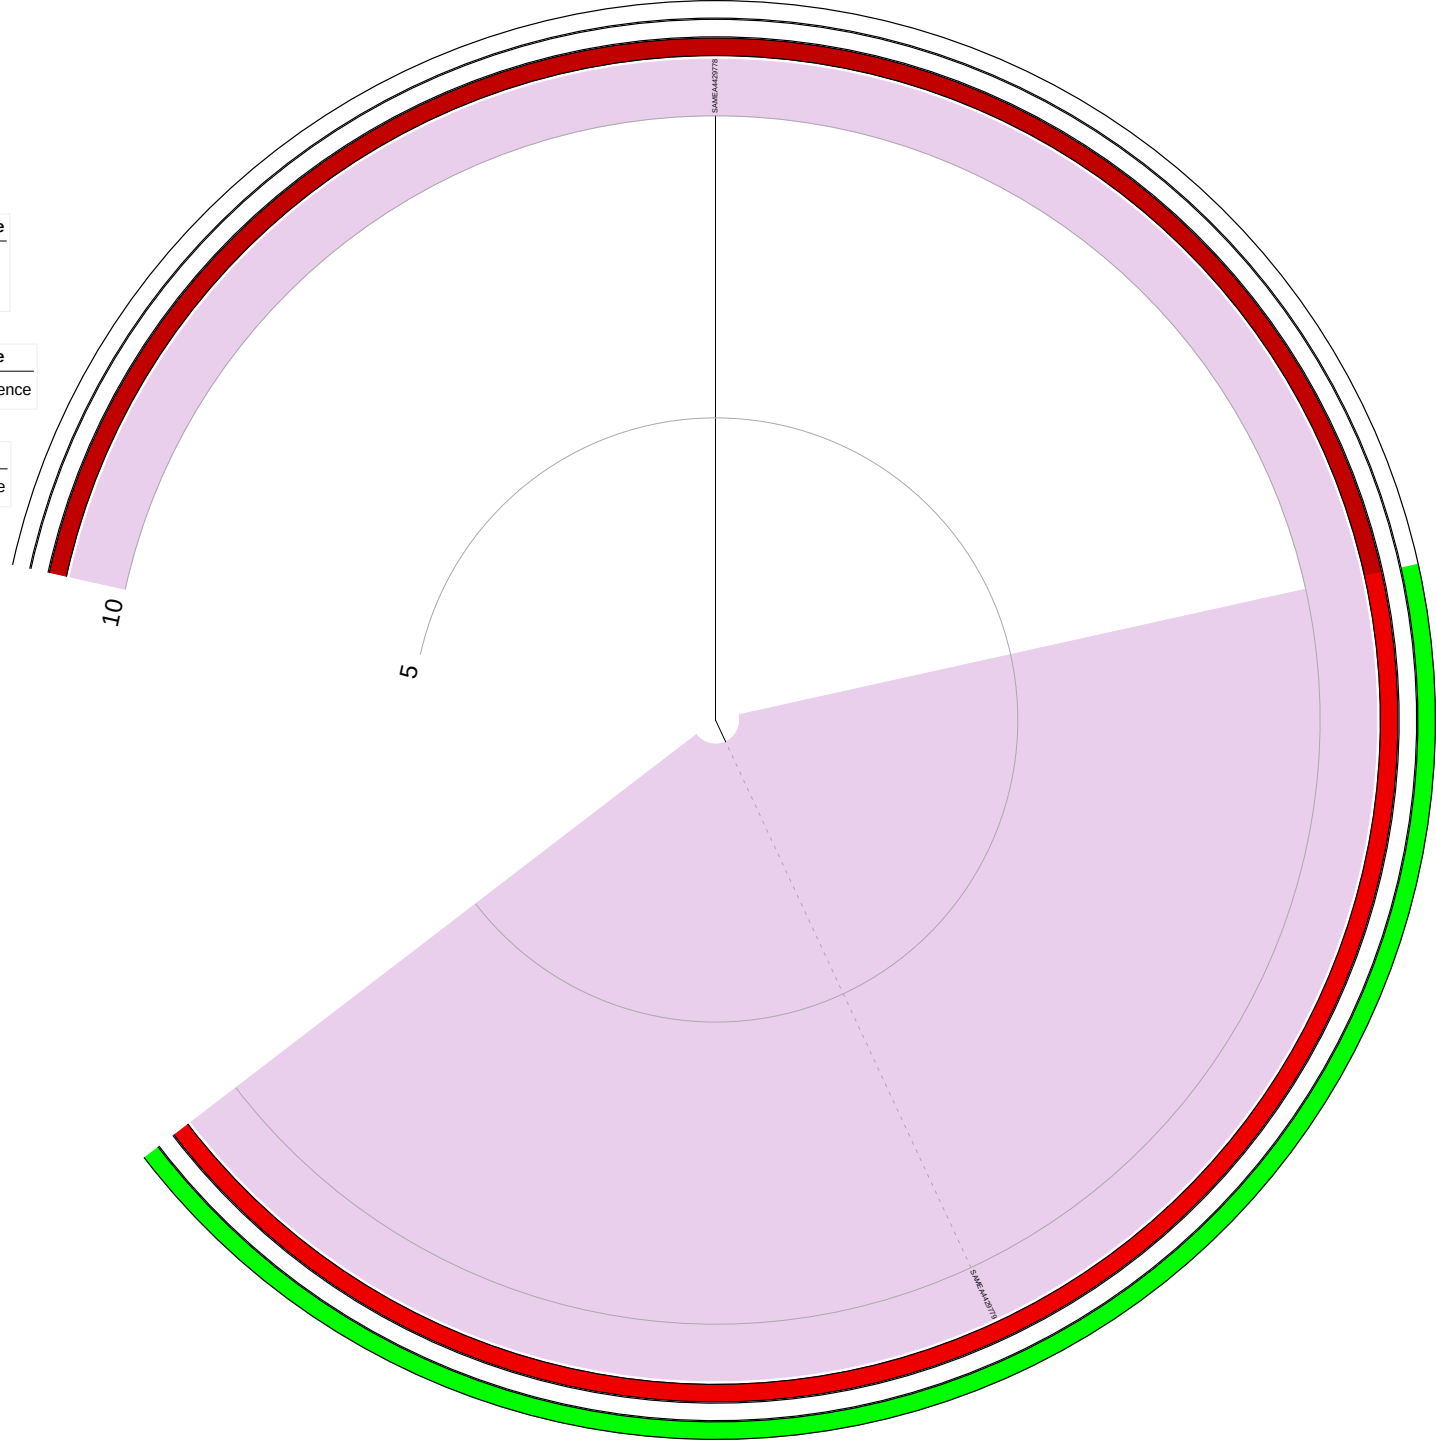

PDS000040040.1
