# Supplementary material
Source: PubMed Central journal article supplement (PMC7858064)
Supplement: mBio.03188-20-sd004.pdf [file mBio.03188-20-sd004.pdf]

Tree scale: 10

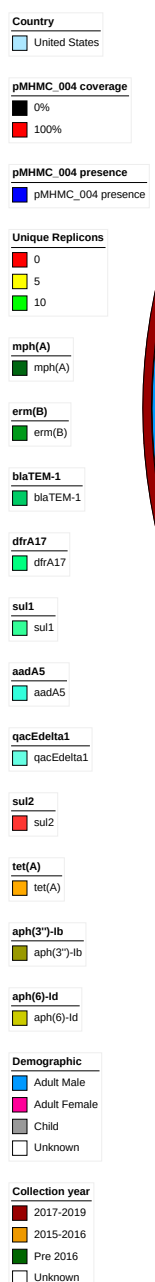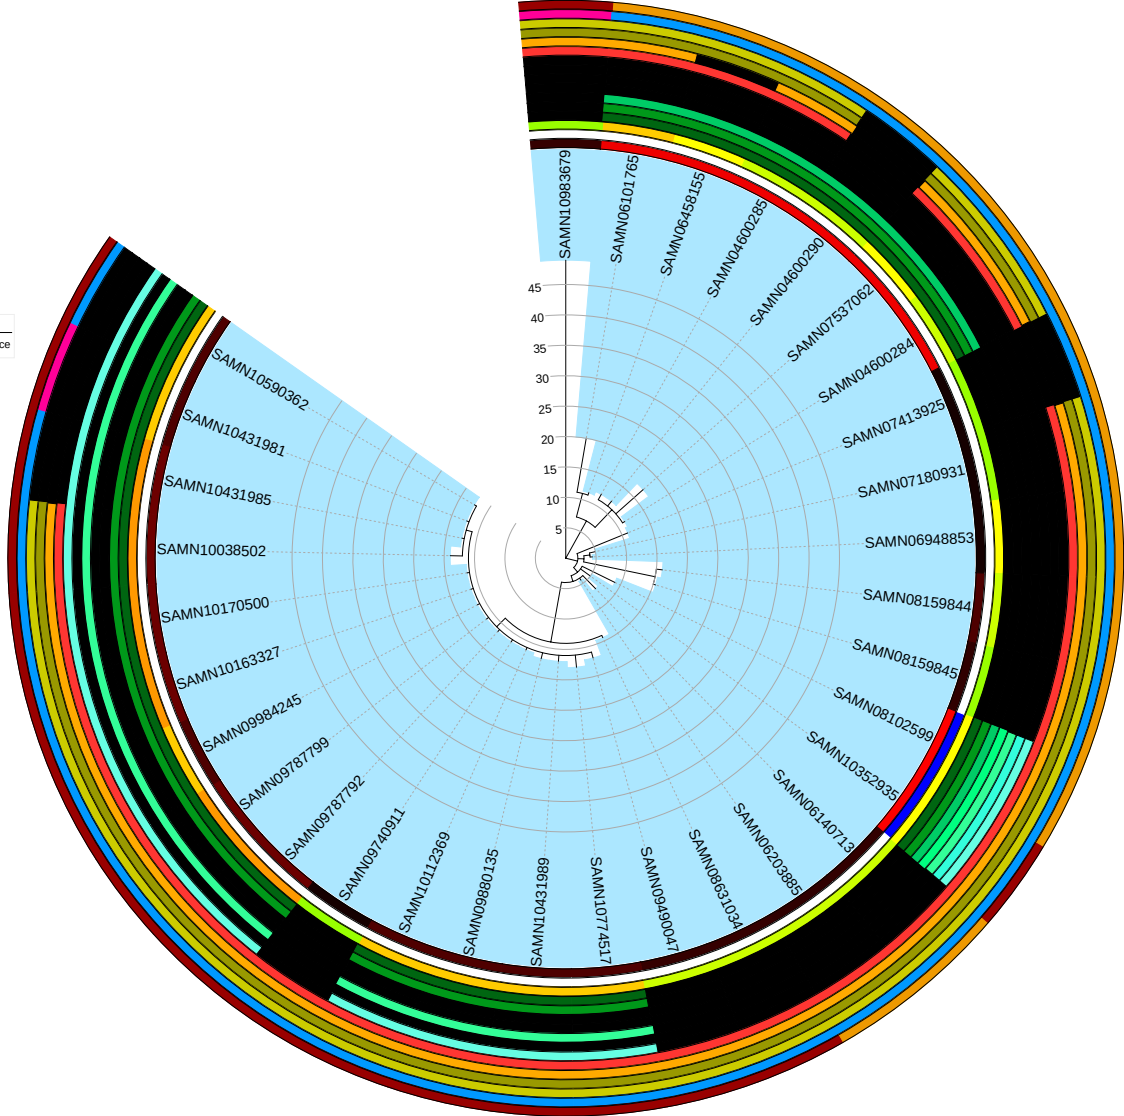

PDS000004492.71

Tree scale: 1 ⇄

**Country**

United States

**pMHMC\_004 coverage**

0%

100%

**pMHMC\_004 presence**

pMHMC\_004 presence

**Unique Replicons**

0

5

10

**mph(A)**

mph(A)

**erm(B)**

erm(B)

**blaTEM-1**

blaTEM-1

**dfrA17**

dfrA17

**sul1**

sul1

**aadA5**

aadA5

**qacEdelta1**

qacEdelta1

**sul2**

sul2

**tet(A)**

tet(A)

**aph(3'')-Ib**

aph(3'')-Ib

**aph(6)-Id**

aph(6)-Id

**Demographic**

Adult Male

Adult Female

Child

Unknown

**Collection year**

2017-2019

2015-2016

Pre 2016

Unknown

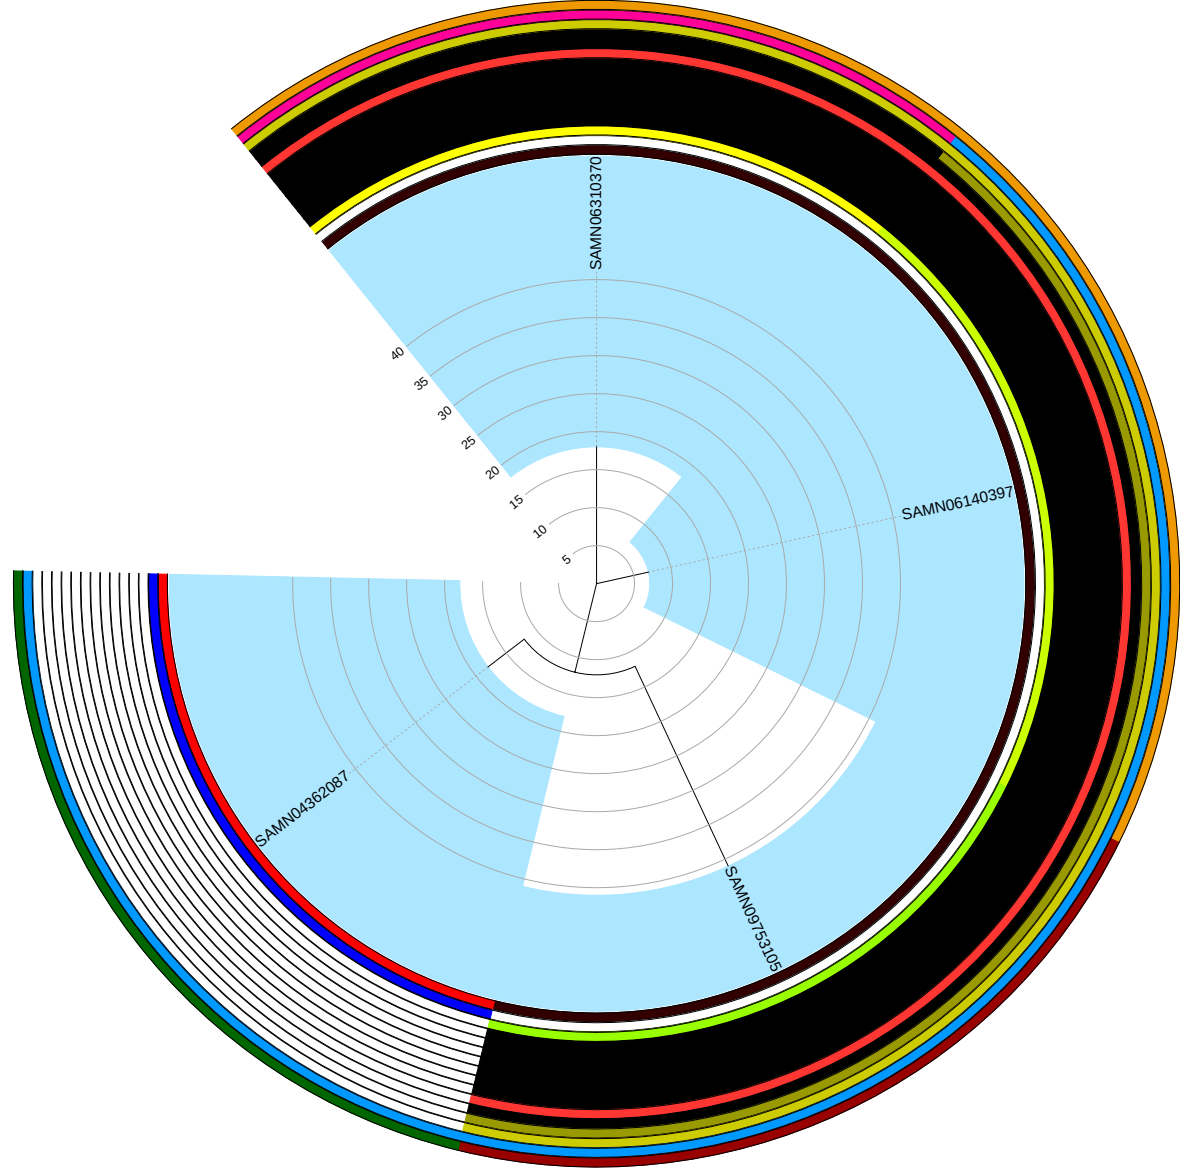

PDS000004894.5

Tree scale: 1

Country

- United States

pMHMC\_004 coverage

- 0%
- 100%

pMHMC\_004 presence

- pMHMC\_004 presence

Unique Replicons

- 0
- 5
- 10

mph(A)

- mph(A)

erm(B)

- erm(B)

blaTEM-1

- blaTEM-1

dfrA17

- dfrA17

sul1

- sul1

aadA5

- aadA5

qacEdelta1

- qacEdelta1

sul2

- sul2

tet(A)

- tet(A)

aph(3<sup>+</sup>)-Ib

- aph(3<sup>+</sup>)-Ib

aph(6)-Id

- aph(6)-Id

Demographic

- Adult Male
- Adult Female
- Child
- Unknown

Collection year

- 2017-2019
- 2015-2016
- Pre 2016
- Unknown

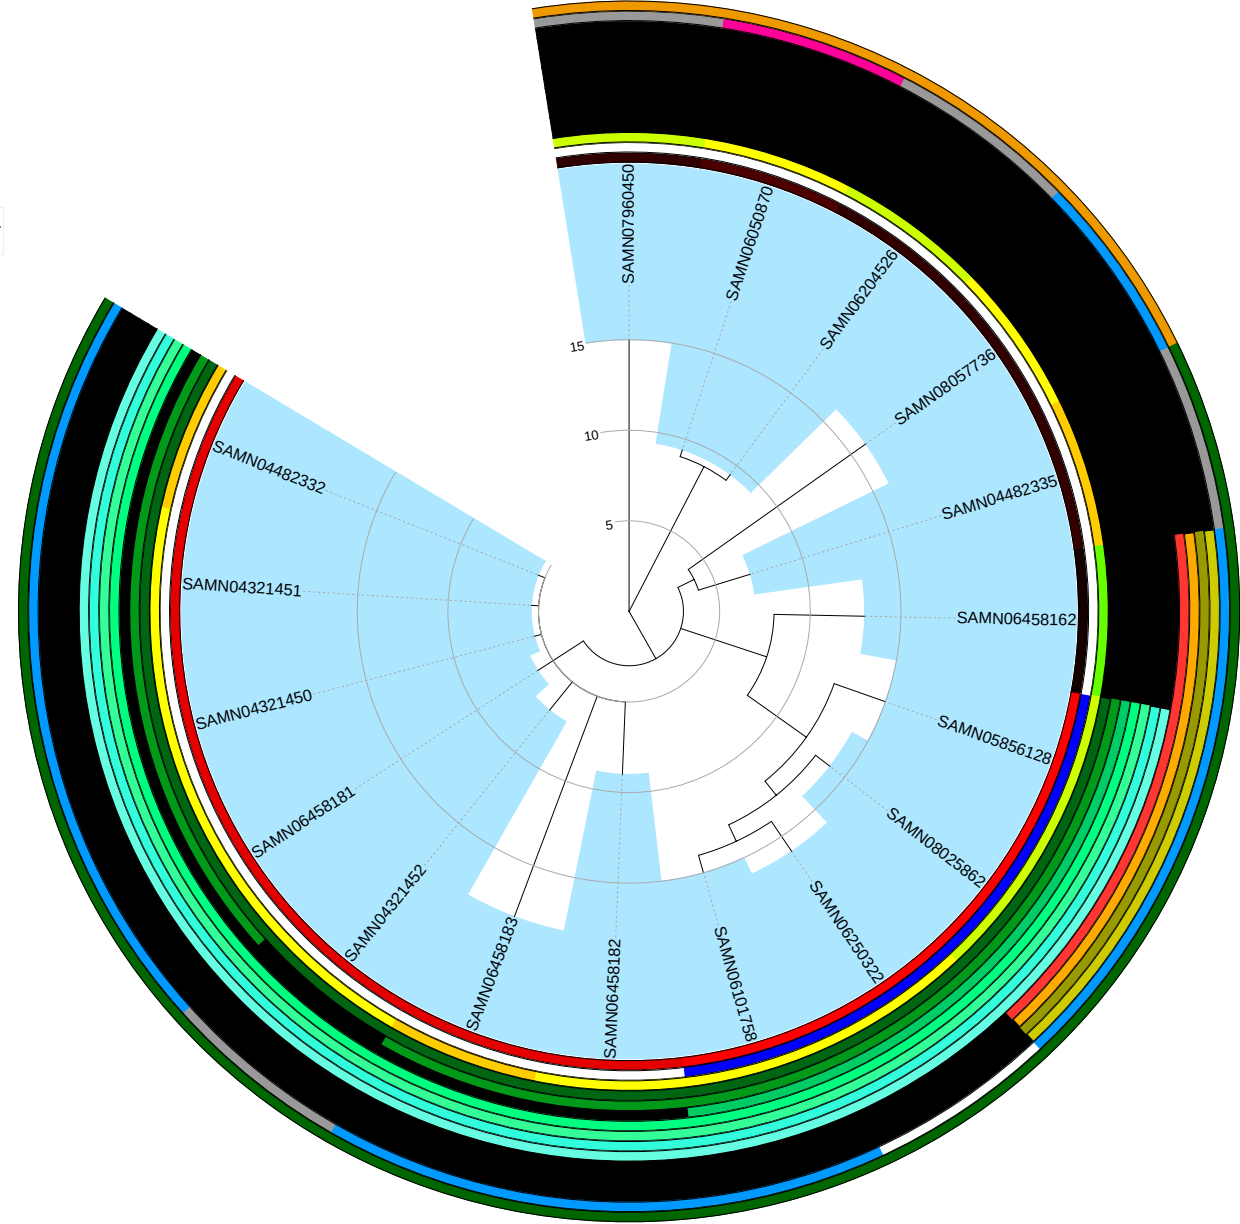

PDS000004902.34

Tree scale: 1

**Country**

United States

**pMHMC\_004 coverage**

0%

100%

**pMHMC\_004 presence**

pMHMC\_004 presence

**mph(A)**

mph(A)

**erm(B)**

erm(B)

**blaTEM-1**

blaTEM-1

**dfrA17**

dfrA17

**sul1**

sul1

**aadA5**

aadA5

**qacEdelta1**

qacEdelta1

**sul2**

sul2

**tet(A)**

tet(A)

**aph(3')-Ib**

aph(3')-Ib

**aph(6)-Id**

aph(6)-Id

**Demographic**

Adult Male

Adult Female

Child

Unknown

**Collection year**

2017-2019

2015-2016

Pre 2016

Unknown

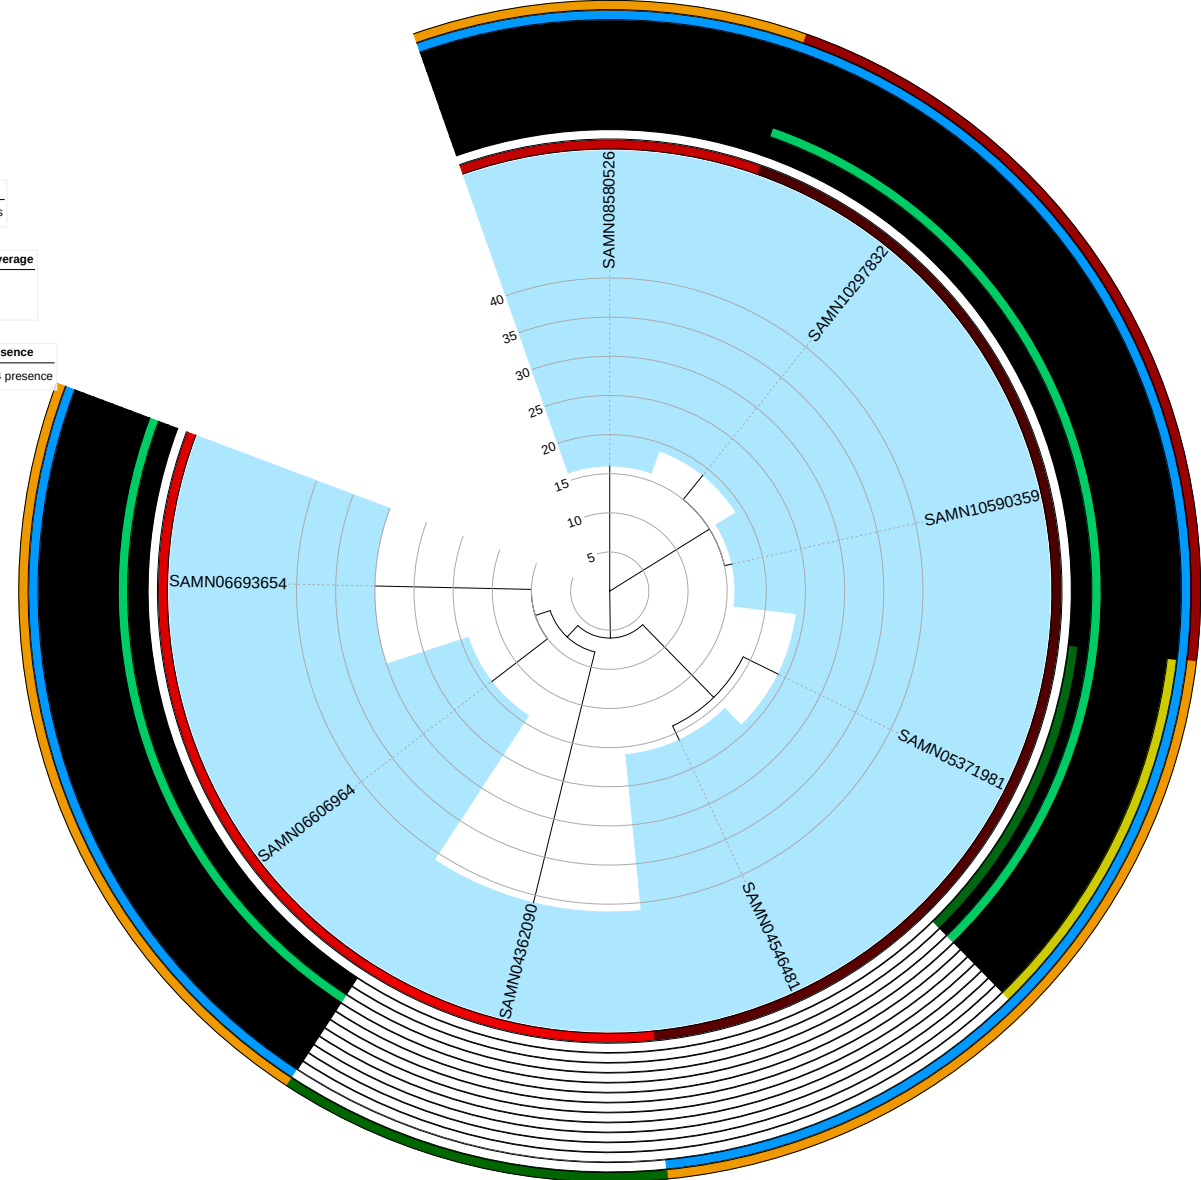

Tree scale: 10

Country

United States

pMHMC\_004 coverage

0%  
100%

pMHMC\_004 presence

pMHMC\_004 presence

Unique Replicons

0  
5  
10

mph(A)

mph(A)

erm(B)

erm(B)

blaTEM-1

blaTEM-1

dfrA17

dfrA17

sul1

sul1

aadA5

aadA5

qacEdelta1

qacEdelta1

sul2

sul2

tet(A)

tet(A)

aph(3'')-Ib

aph(3'')-Ib

aph(6)-Id

aph(6)-Id

Demographic

Adult Male

Adult Female

Child

Unknown

Collection year

2017-2019

2015-2016

Pre 2016

Unknown

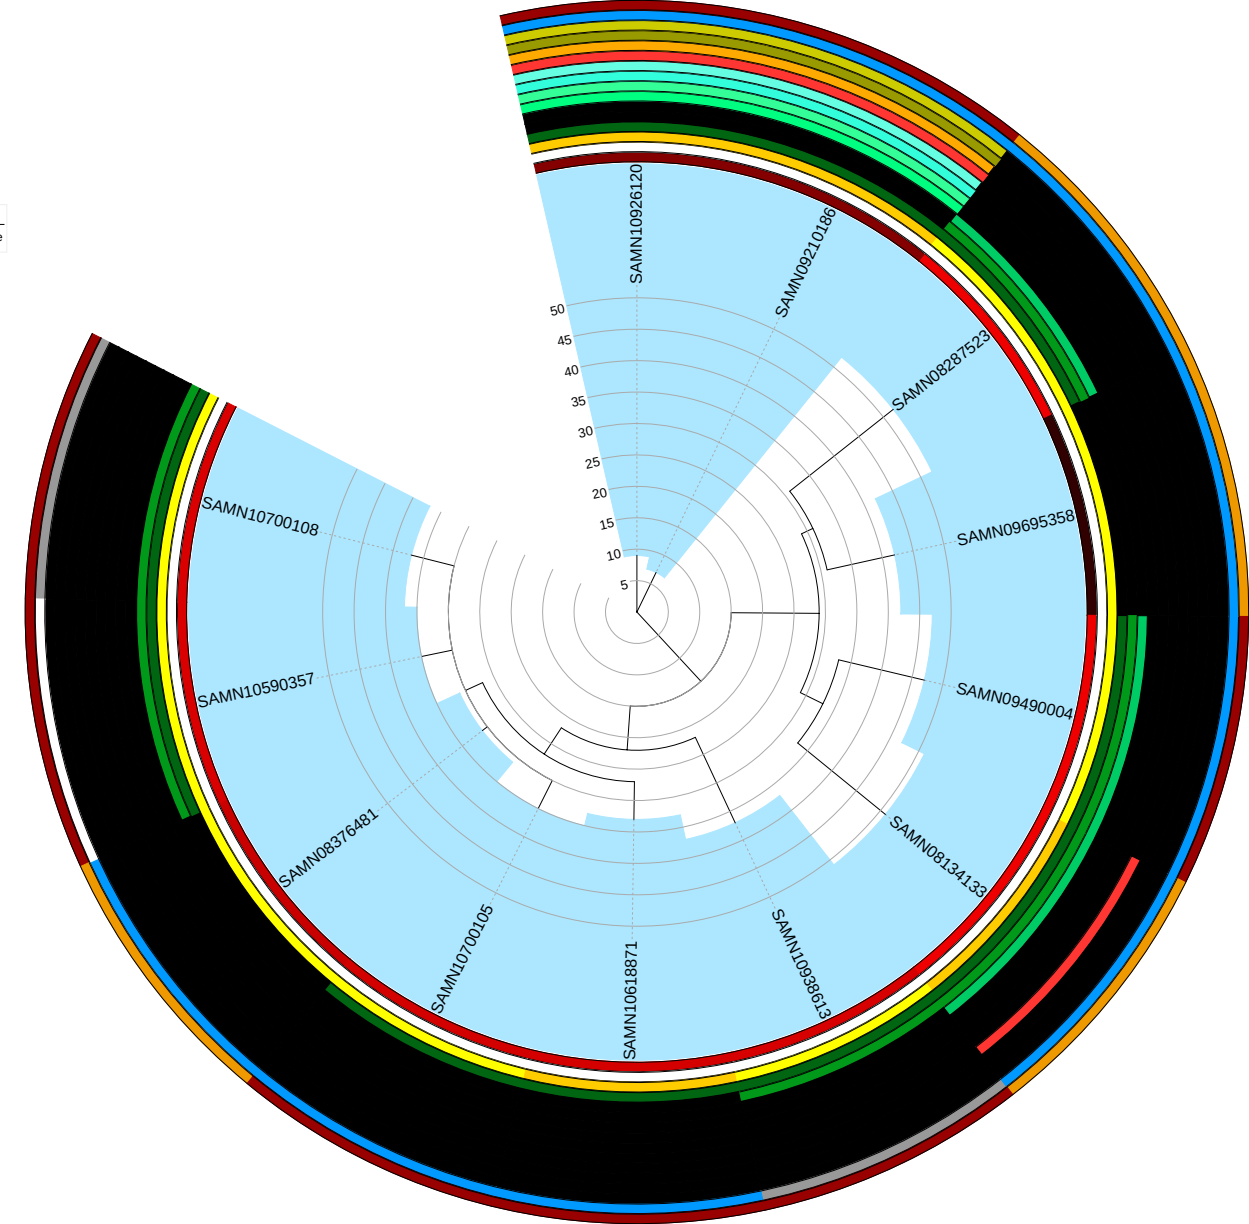

PDS000006025.53

Tree scale: 1

Country

- United States
- Other or none

pMHMC\_004 coverage

- 0%
- 100%

pMHMC\_004 presence

- pMHMC\_004 presence

Unique Replicons

- 0
- 5
- 10

mph(A)

- mph(A)

erm(B)

- erm(B)

blaTEM-1

- blaTEM-1

dfrA17

- dfrA17

sul1

- sul1

aadA5

- aadA5

qacEdelta1

- qacEdelta1

sul2

- sul2

tet(A)

- tet(A)

aph(3)-Ib

- aph(3)-Ib

aph(6)-Id

- aph(6)-Id

Demographic

- Adult Male
- Adult Female
- Child
- Unknown

Collection year

- 2017-2019
- 2015-2016
- Pre 2016
- Unknown

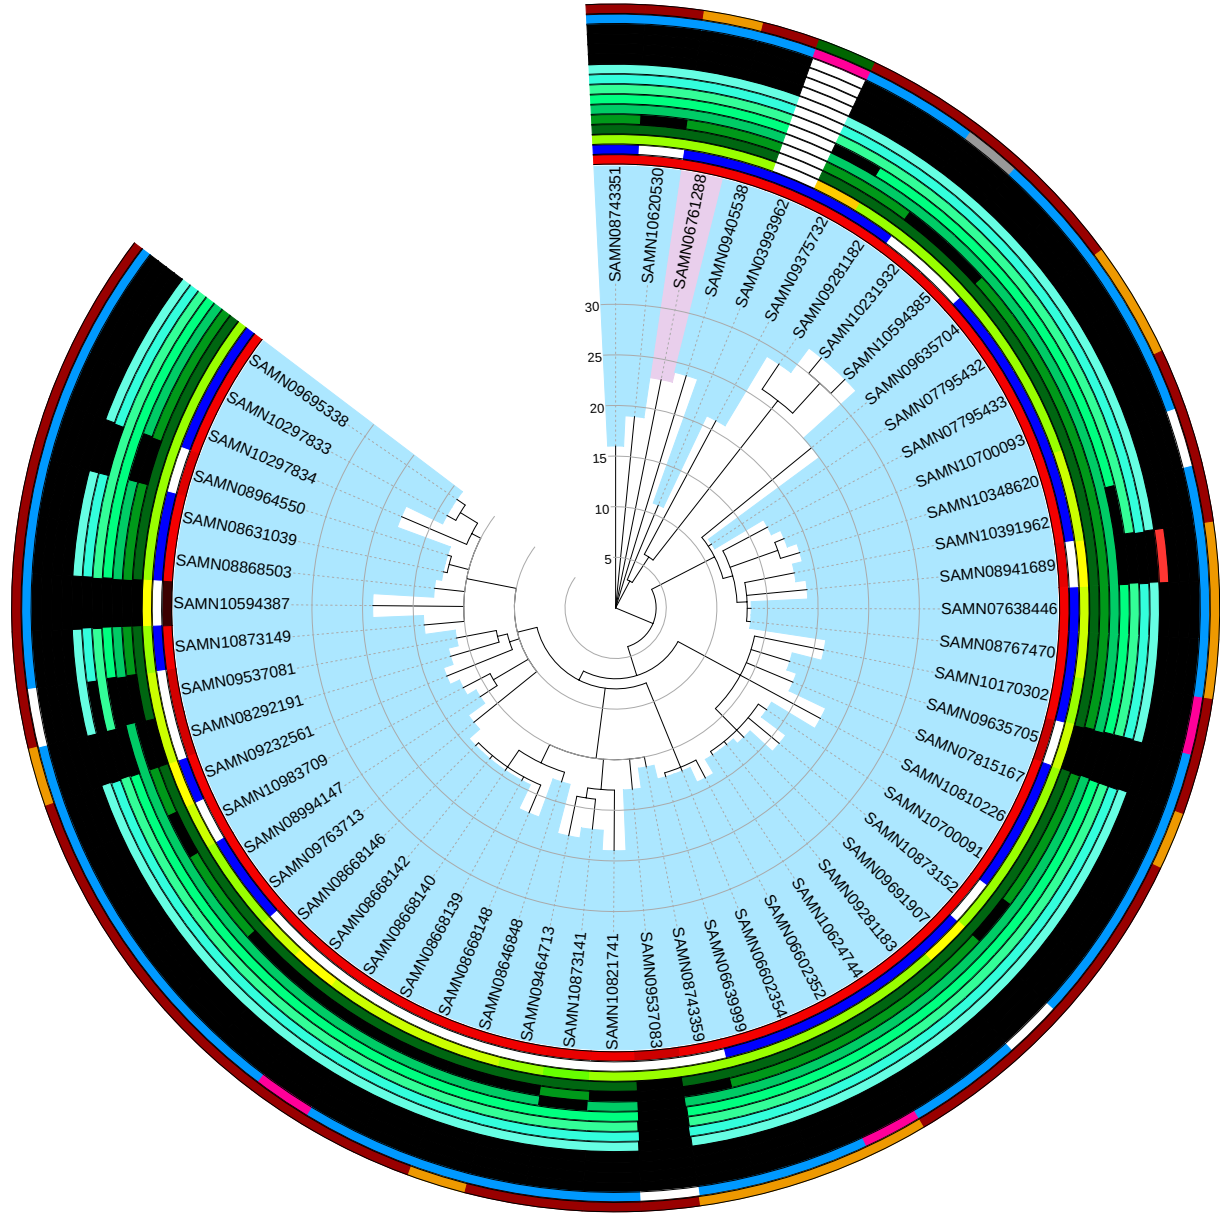

PDS000006028.122



Tree scale: 1

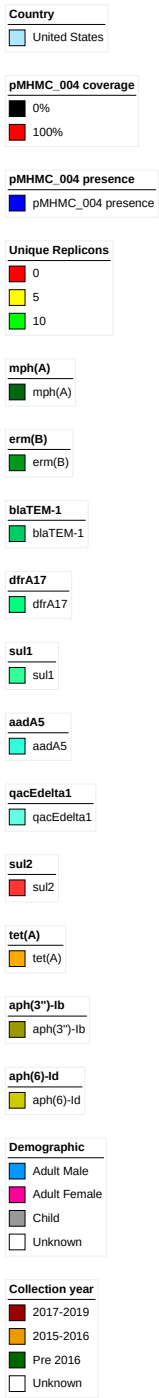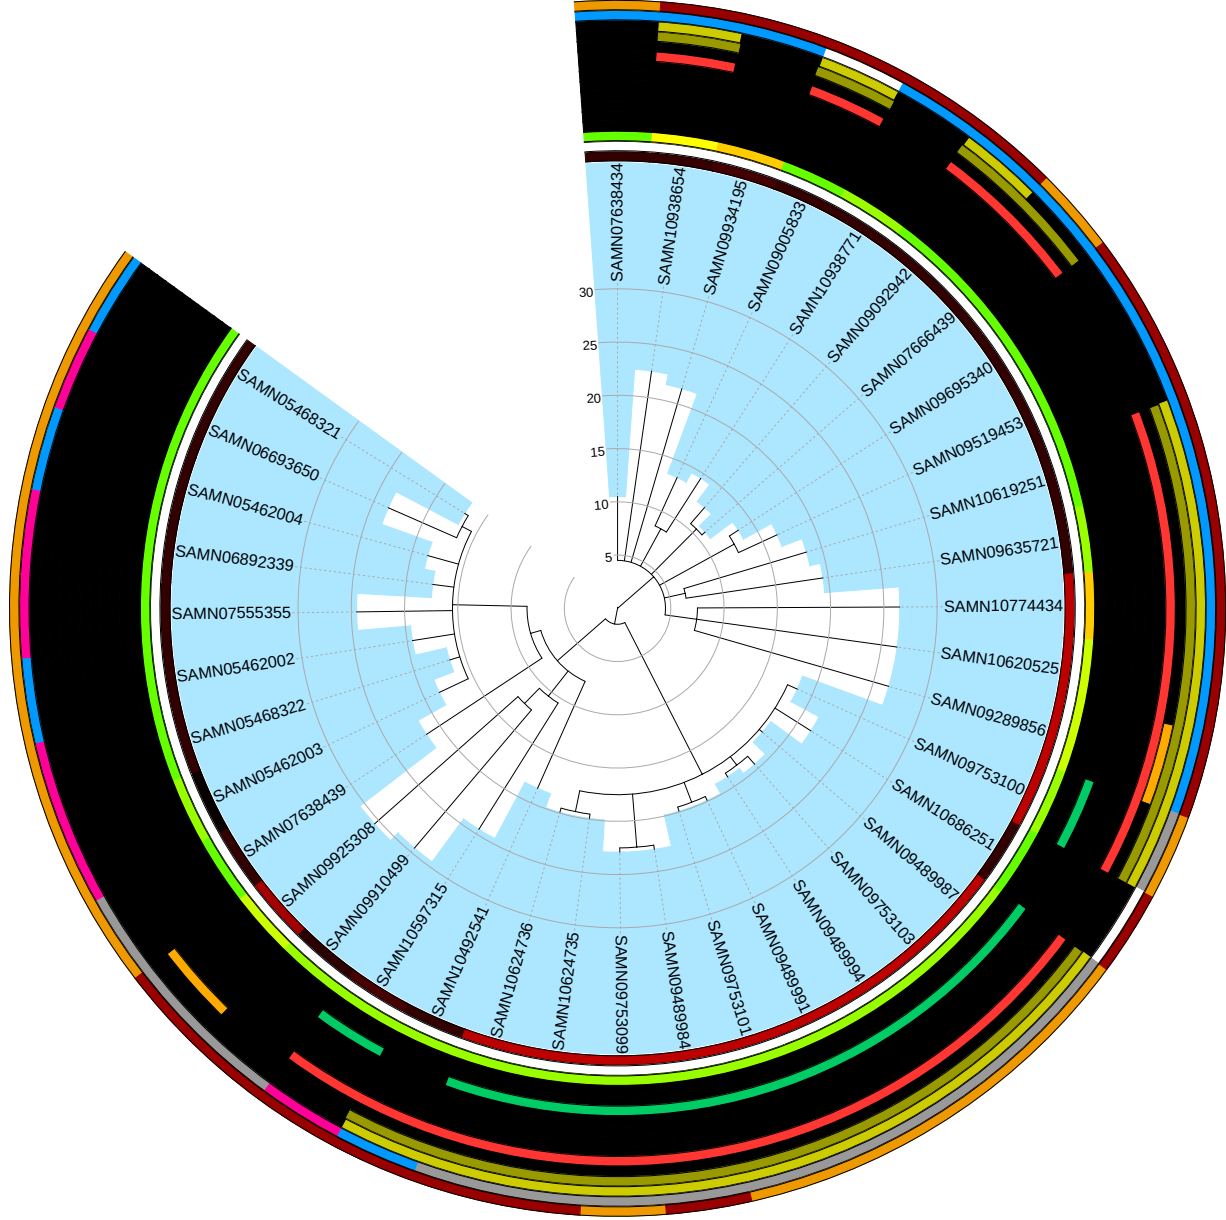

PDS000007367.47

Tree scale: 1

Country

- United States
- Other or none

pMHMC\_004 coverage

- 0%
- 100%

pMHMC\_004 presence

- pMHMC\_004 presence

Unique Replicons

- 0
- 5
- 10

mph(A)

- mph(A)

erm(B)

- erm(B)

blaTEM-1

- blaTEM-1

dfrA17

- dfrA17

sul1

- sul1

aadA5

- aadA5

qacEdelta1

- qacEdelta1

sul2

- sul2

tet(A)

- tet(A)

aph(3')-Ib

- aph(3')-Ib

aph(6)-Id

- aph(6)-Id

Demographic

- Adult Male
- Adult Female
- Child
- Unknown

Collection year

- 2017-2019
- 2015-2016
- Pre 2016
- Unknown

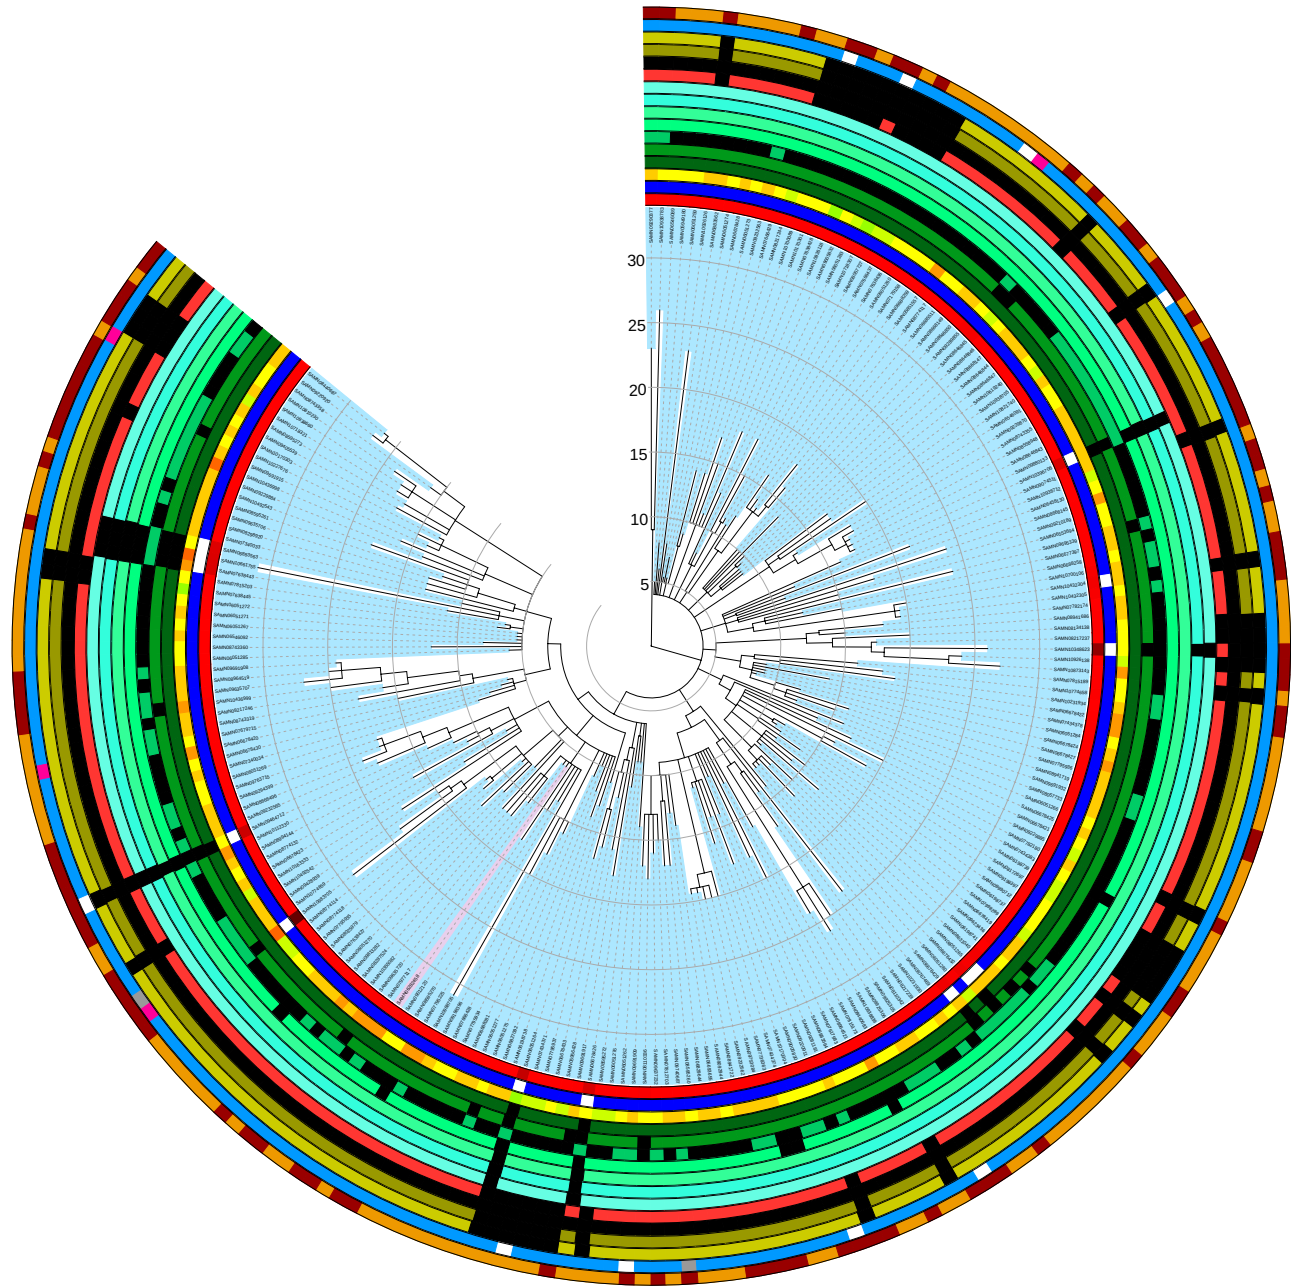

PDS000007822.142



Tree scale: 1

Country

United States

pMHMC\_004 coverage

0%

100%

pMHMC\_004 presence

pMHMC\_004 presence

Unique Replicons

0

5

10

mph(A)

mph(A)

erm(B)

erm(B)

blaTEM-1

blaTEM-1

dfrA17

dfrA17

sul1

sul1

aadA5

aadA5

qacEdelta1

qacEdelta1

sul2

sul2

tet(A)

tet(A)

aph(3')-Ib

aph(3')-Ib

aph(6)-Id

aph(6)-Id

Demographic

Adult Male

Adult Female

Child

Unknown

Collection year

2017-2019

2015-2016

Pre 2016

Unknown

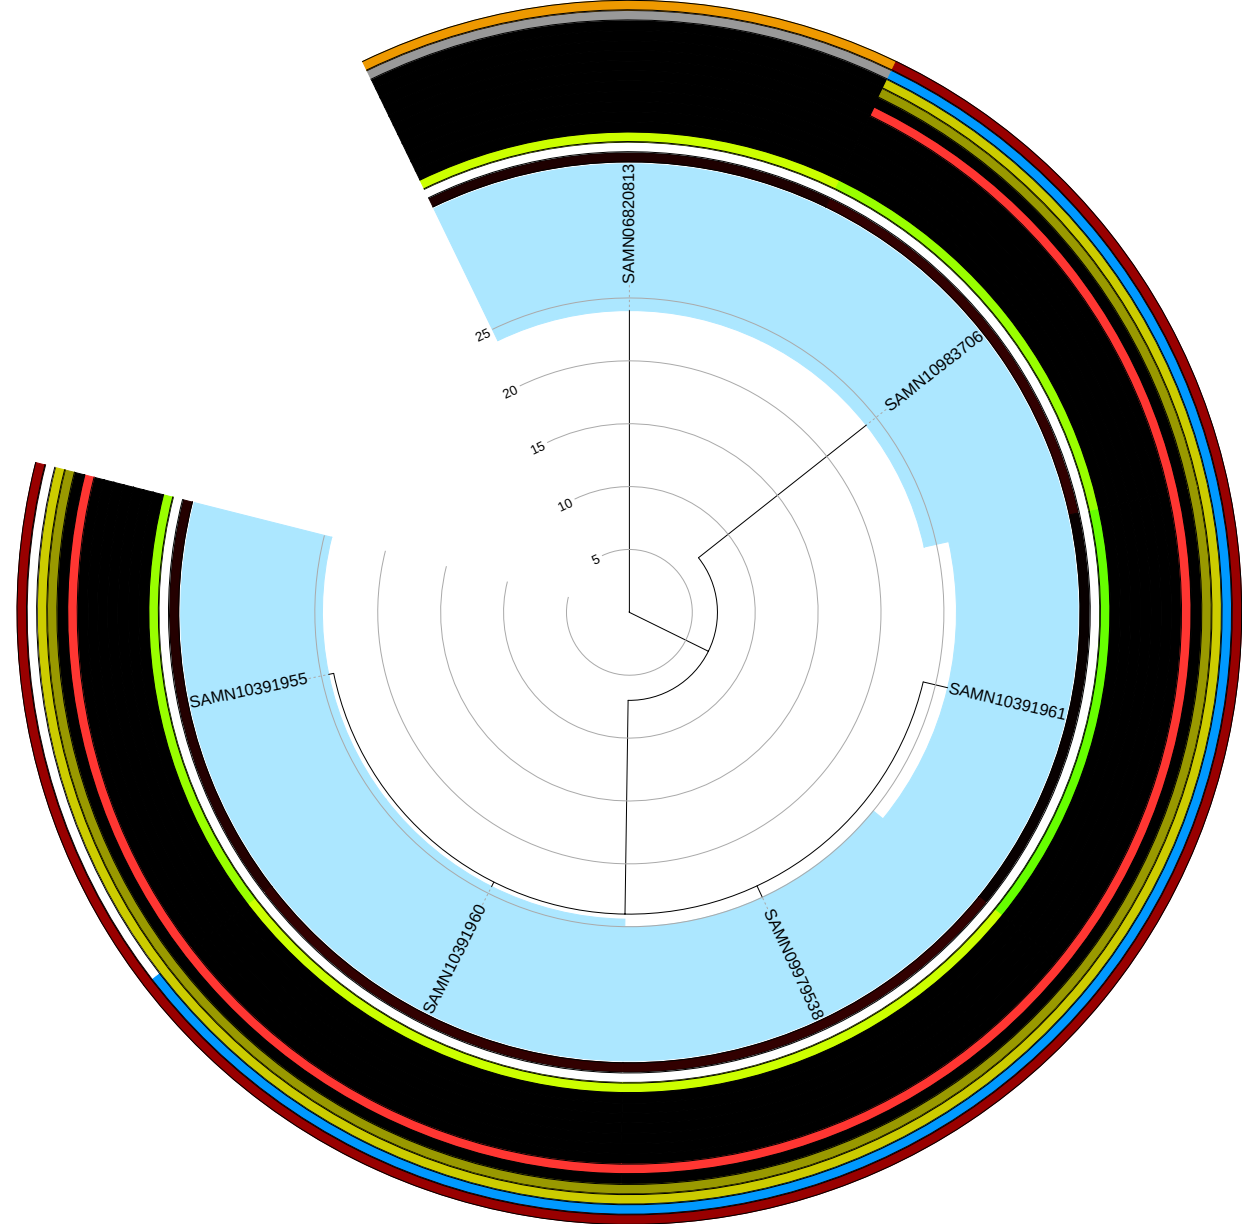

PDS000008718.35

Tree scale: 1

Country  
United States

pMHMC\_004 coverage  
0%  
100%

pMHMC\_004 presence  
pMHMC\_004 presence

Unique Replicons  
0  
5  
10

mph(A)  
mph(A)

erm(B)  
erm(B)

blaTEM-1  
blaTEM-1

dfrA17  
dfrA17

sul1  
sul1

aadA5  
aadA5

qacEdelta1  
qacEdelta1

sul2  
sul2

tet(A)  
tet(A)

aph(3<sup>+</sup>)-Ib  
aph(3<sup>+</sup>)-Ib

aph(6)-Id  
aph(6)-Id

Demographic  
Adult Male  
Adult Female  
Child  
Unknown

Collection year  
2017-2019  
2015-2016  
Pre 2016  
Unknown

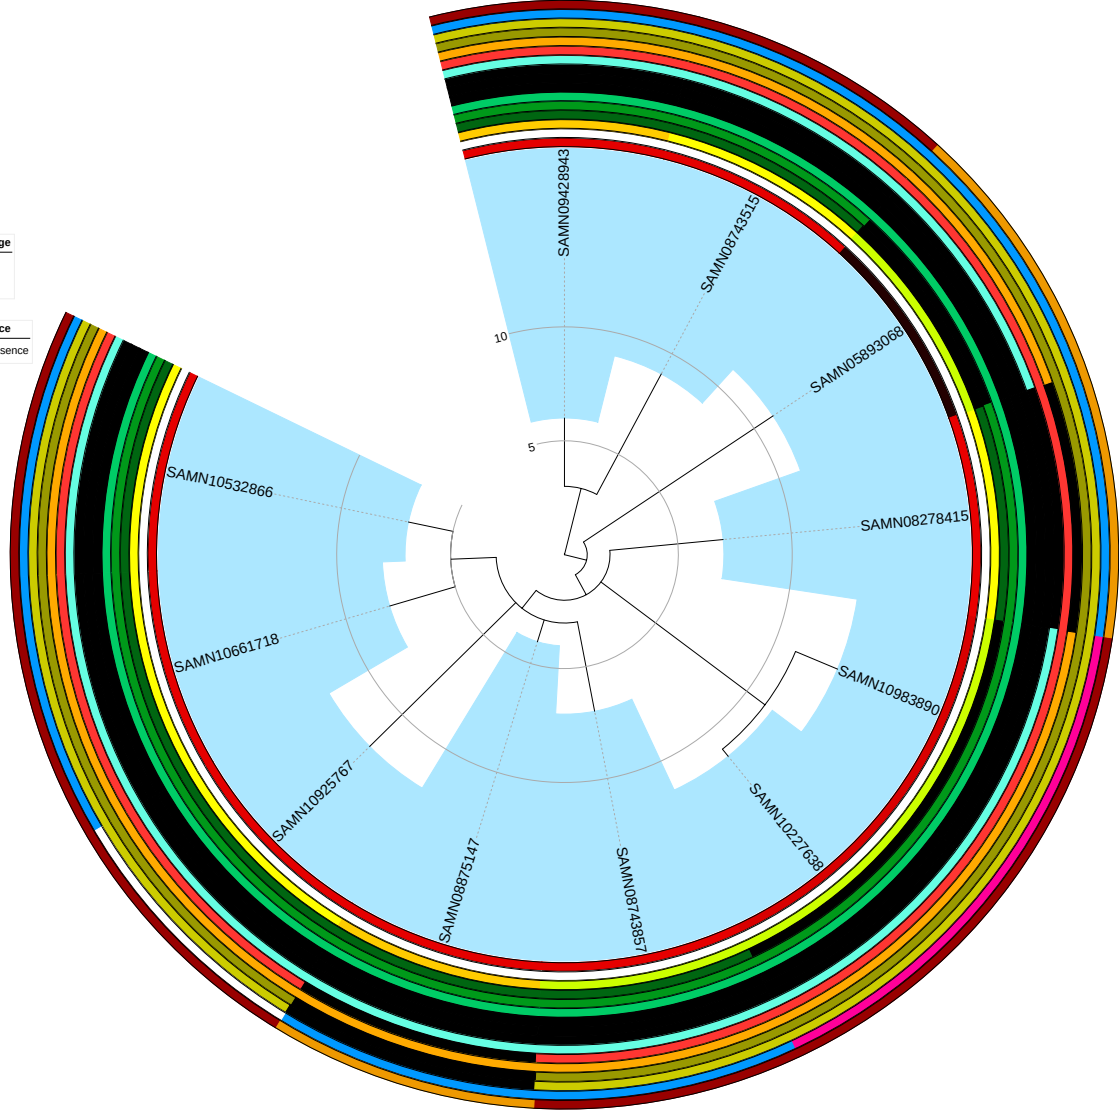

PDS000008808.21

Tree scale: 10

Country  
United States

pMHMC\_004 coverage  
0%  
100%

pMHMC\_004 presence  
pMHMC\_004 presence

Unique Replicons  
0  
5  
10

mph(A)  
mph(A)

erm(B)  
erm(B)

blaTEM-1  
blaTEM-1

dfrA17  
dfrA17

sul1  
sul1

aadA5  
aadA5

qacEdelta1  
qacEdelta1

sul2  
sul2

tet(A)  
tet(A)

aph(3<sup>+</sup>)-Ib  
aph(3<sup>+</sup>)-Ib

aph(6)-Id  
aph(6)-Id

Demographic  
Adult Male  
Adult Female  
Child  
Unknown

Collection year  
2017-2019  
2015-2016  
Pre 2016  
Unknown

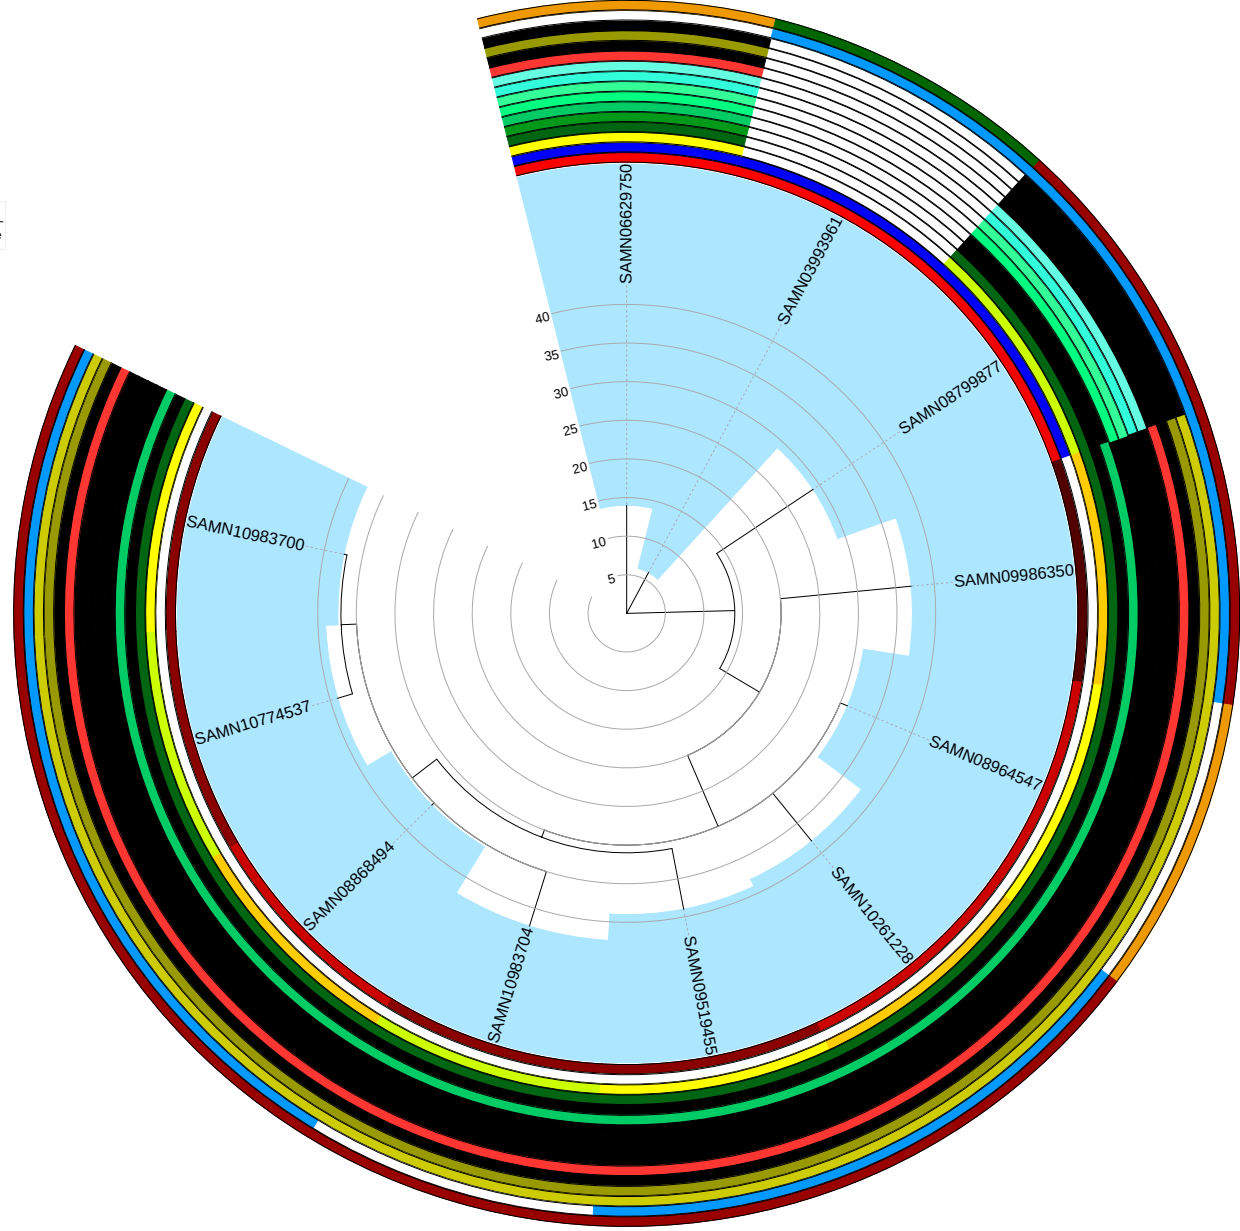

PDS000012064.15

Tree scale: 1

**Country**

United States

**pMHMC\_004 coverage**

0%

100%

**pMHMC\_004 presence**

pMHMC\_004 presence

**Unique Replicons**

0

5

10

**mph(A)**

mph(A)

**erm(B)**

erm(B)

**blaTEM-1**

blaTEM-1

**dfrA17**

dfrA17

**sul1**

sul1

**aadA5**

aadA5

**qacEdelta1**

qacEdelta1

**sul2**

sul2

**tet(A)**

tet(A)

**aph(3<sup>+</sup>)-Ib**

aph(3<sup>+</sup>)-Ib

**aph(6)-Id**

aph(6)-Id

**Demographic**

Adult Male

Adult Female

Child

Unknown

**Collection year**

2017-2019

2015-2016

Pre 2016

Unknown

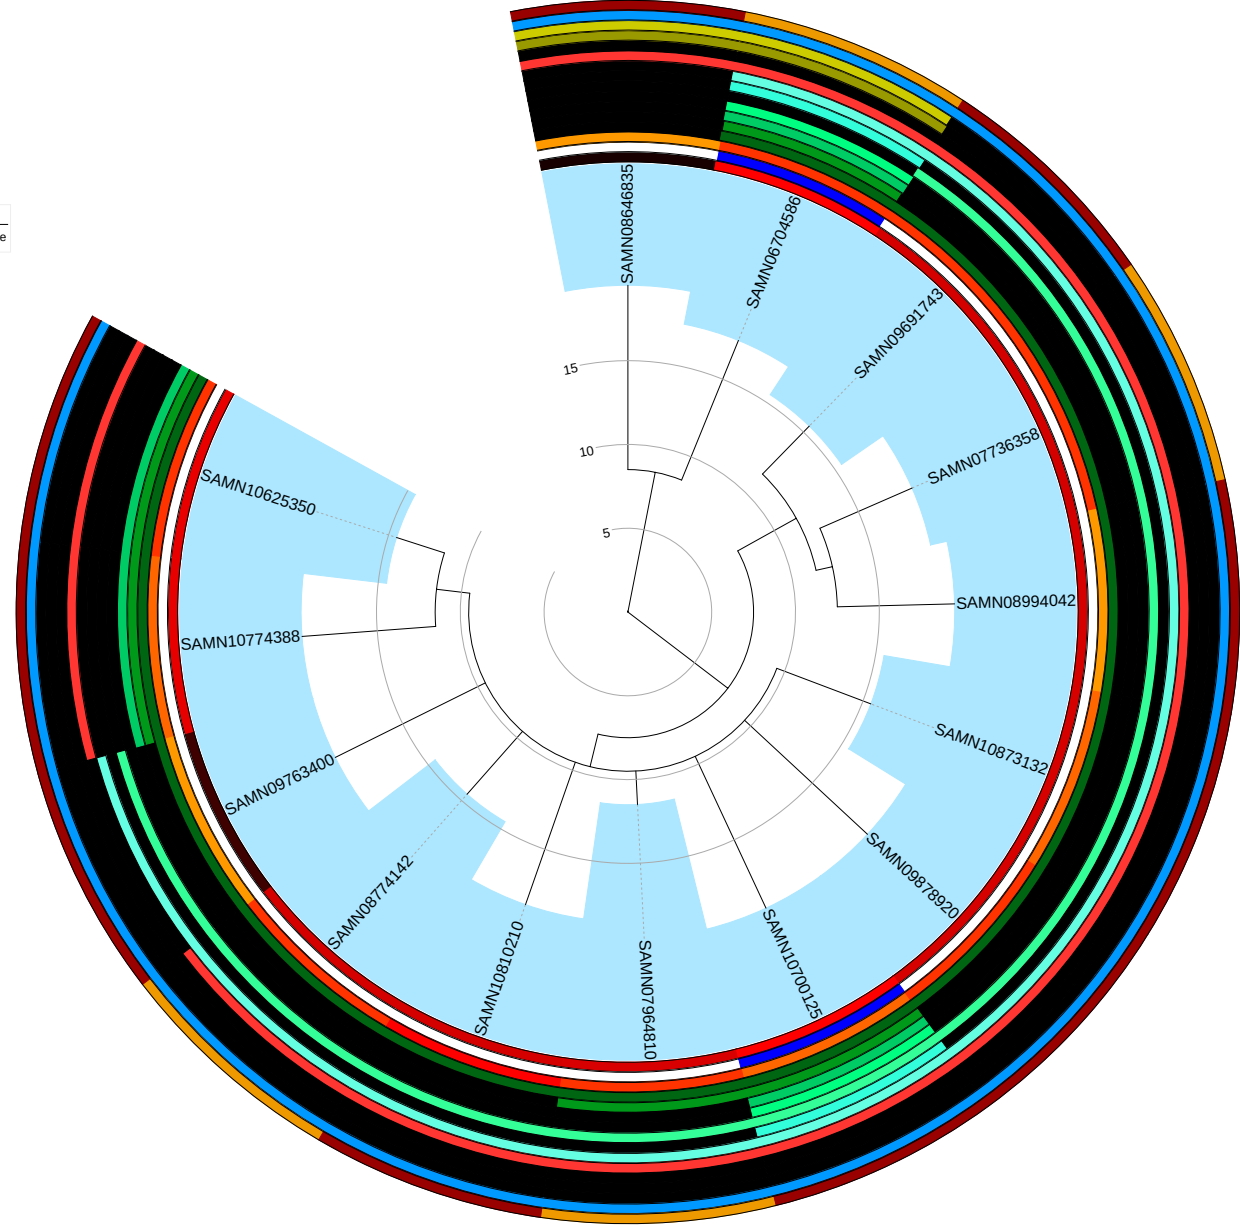

PDS000012316.21

Tree scale: 1 ↔

**Country**

United States

**pMHMC\_004 coverage**

0%  
100%

**pMHMC\_004 presence**

pMHMC\_004 presence

**Unique Replicons**

0  
5  
10

**mph(A)**

mph(A)

**erm(B)**

erm(B)

**blaTEM-1**

blaTEM-1

**dfrA17**

dfrA17

**sul1**

sul1

**aadA5**

aadA5

**qacEdelta1**

qacEdelta1

**sul2**

sul2

**tet(A)**

tet(A)

**aph(3<sup>+</sup>)-Ib**

aph(3<sup>+</sup>)-Ib

**aph(6)-Id**

aph(6)-Id

**Demographic**

Adult Male  
Adult Female  
Child  
Unknown

**Collection year**

2017-2019  
2015-2016  
Pre 2016  
Unknown

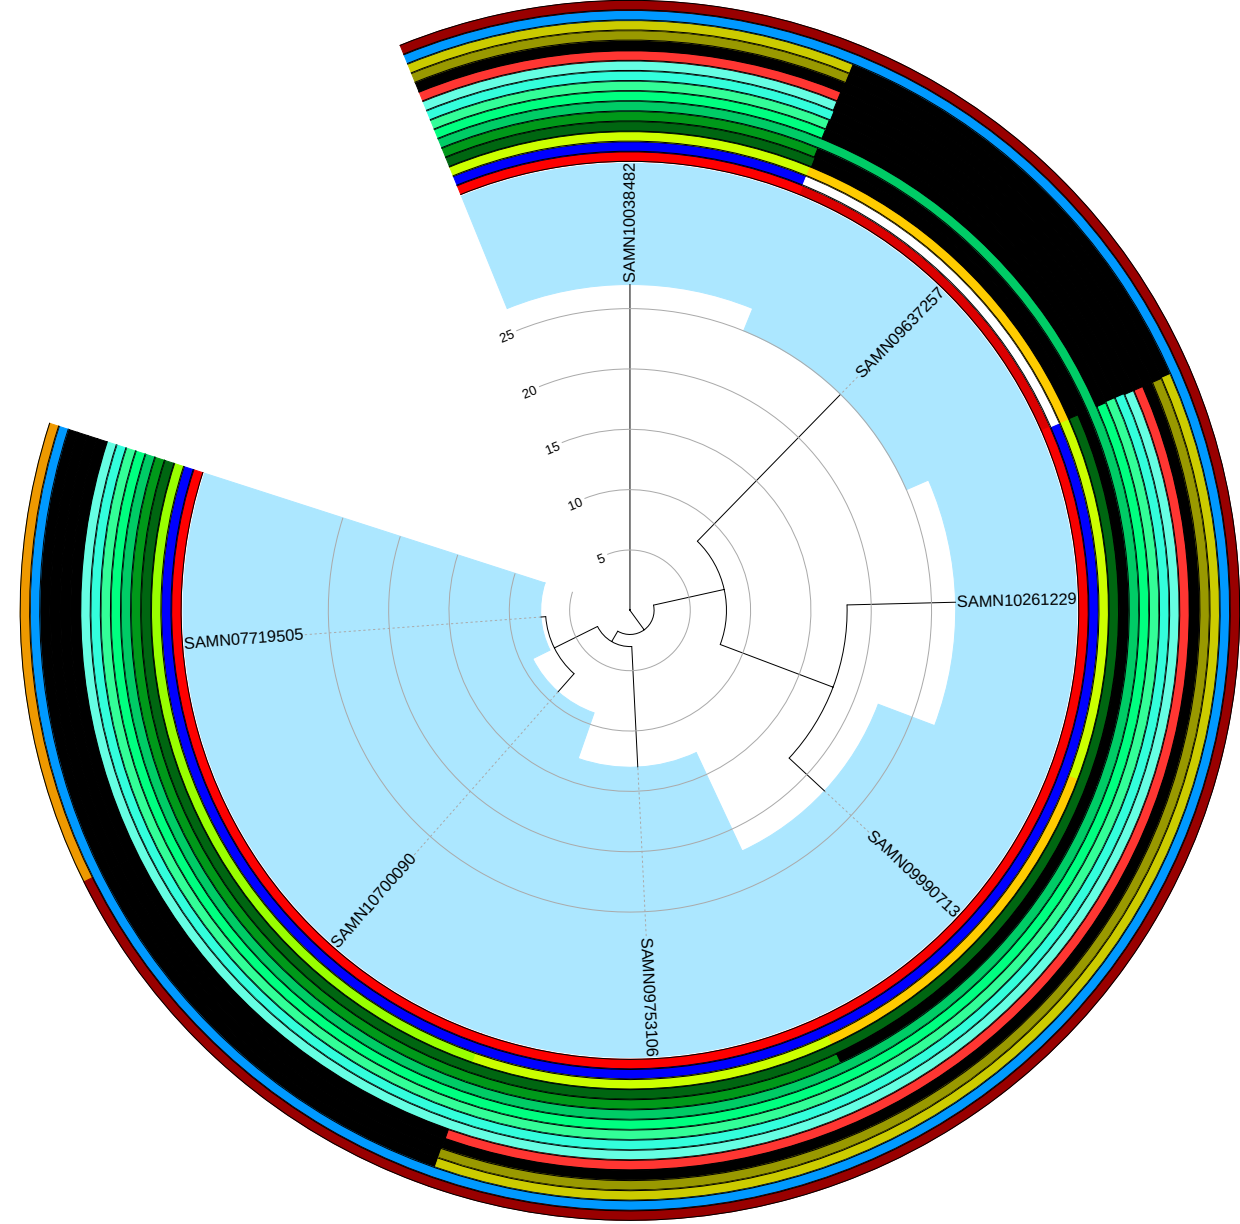

PDS000024112.9



Tree scale: 10

**Country**

- United States
- Other or none

**pMHMC\_004 coverage**

- 0%
- 100%

**pMHMC\_004 presence**

- pMHMC\_004 presence

**Unique Replicons**

- 0
- 5
- 10

**mph(A)**

- mph(A)

**erm(B)**

- erm(B)

**blaTEM-1**

- blaTEM-1

**dfrA17**

- dfrA17

**sul1**

- sul1

**aadA5**

- aadA5

**qacEdelta1**

- qacEdelta1

**sul2**

- sul2

**tet(A)**

- tet(A)

**aph(3'')-Ib**

- aph(3'')-Ib

**aph(6)-Id**

- aph(6)-Id

**Demographic**

- Adult Male
- Adult Female
- Child
- Unknown

**Collection year**

- 2017-2019
- 2015-2016
- Pre 2016
- Unknown

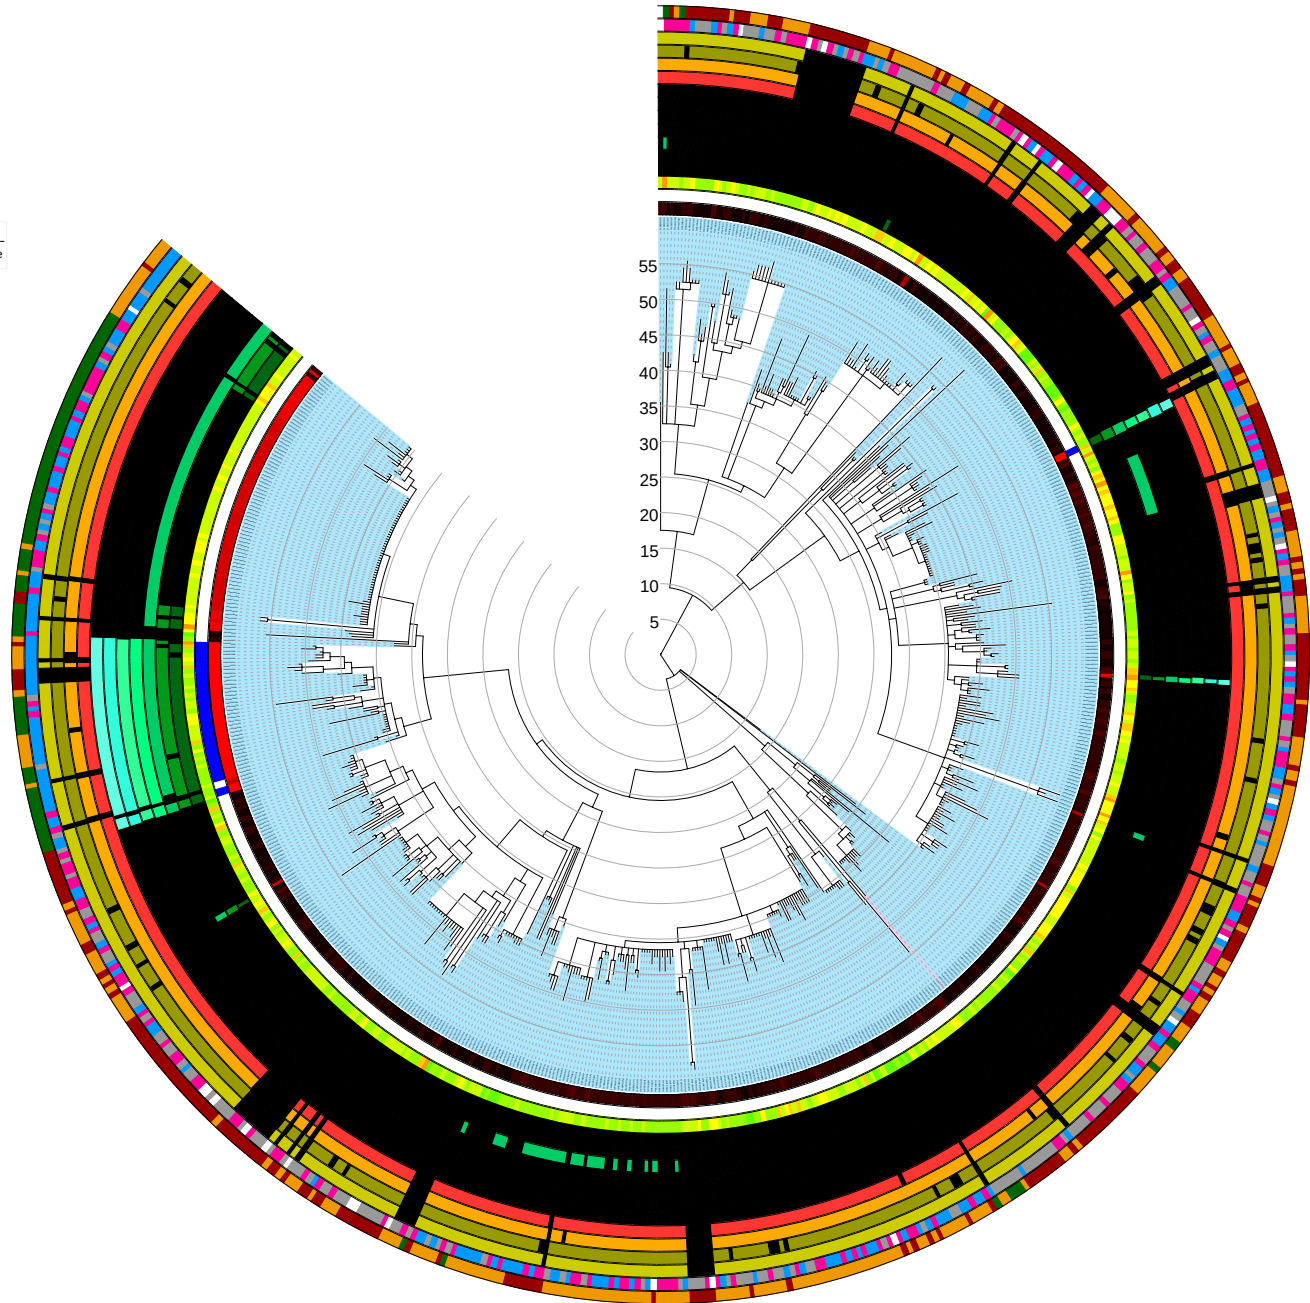

PDS000033340.81

Tree scale: 1

Country

- United States
- Other or none

pMHMC\_004 coverage

- 0%
- 100%

pMHMC\_004 presence

- pMHMC\_004 presence

Unique Replicons

- 0
- 5
- 10

mph(A)

- mph(A)

erm(B)

- erm(B)

blaTEM-1

- blaTEM-1

dfiA17

- dfiA17

sul1

- sul1

aadA5

- aadA5

qacEdelta1

- qacEdelta1

sul2

- sul2

tet(A)

- tet(A)

aph(3'')-Ib

- aph(3'')-Ib

aph(6)-Id

- aph(6)-Id

Demographic

- Adult Male
- Adult Female
- Child
- Unknown

Collection year

- 2017-2019
- 2015-2016
- Pre 2016
- Unknown

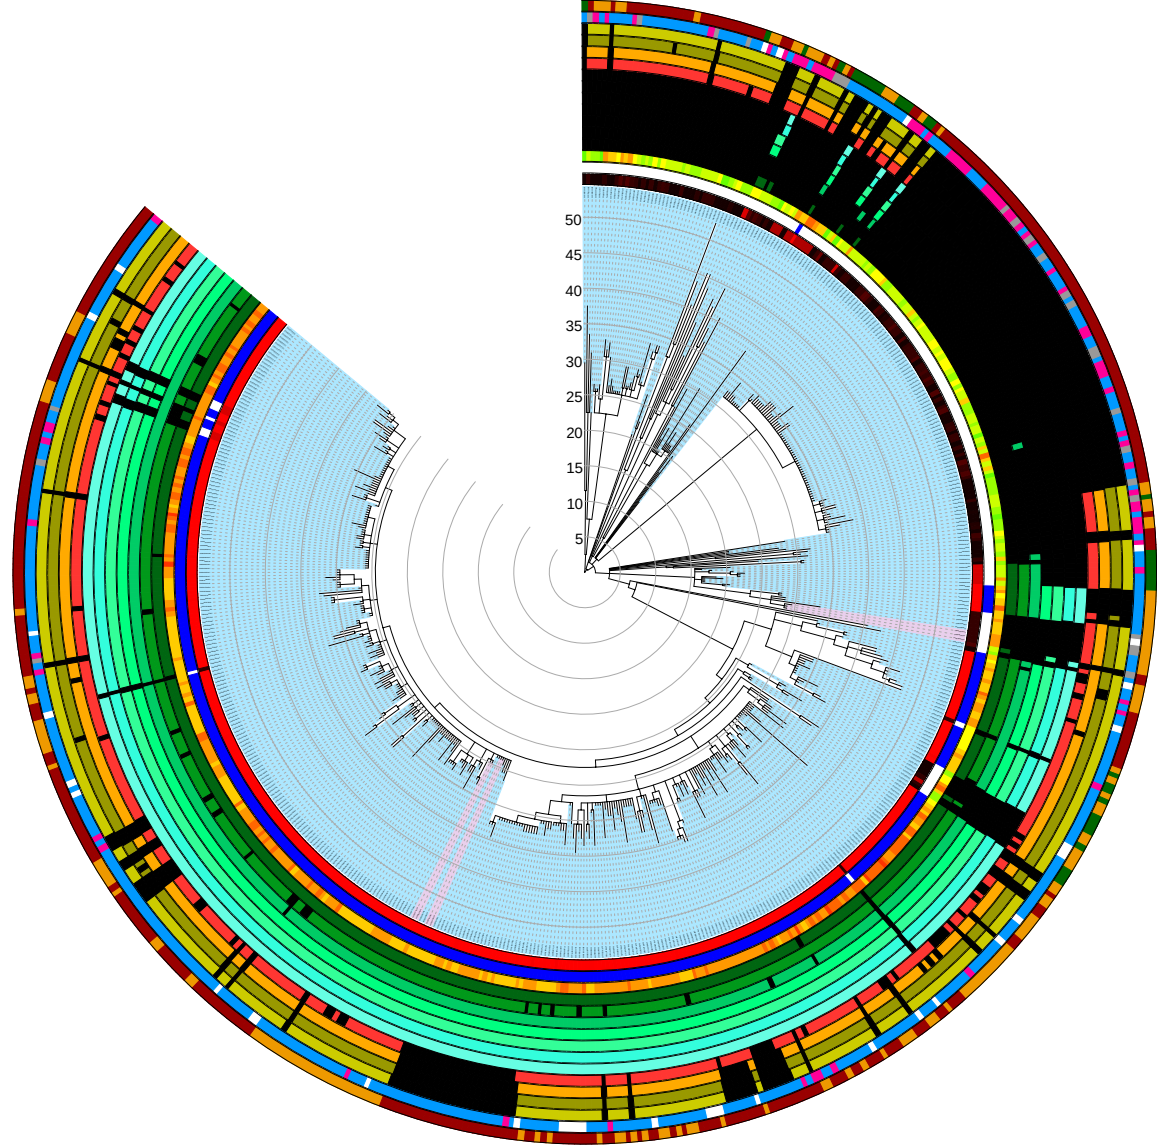

PDS000033428.133

Tree scale: 1

Country  
United States

pMHMC\_004 coverage  
0%  
100%

pMHMC\_004 presence  
pMHMC\_004 presence

Unique Replicons  
0  
5  
10

mph(A)  
mph(A)

erm(B)  
erm(B)

blaTEM-1  
blaTEM-1

dfrA17  
dfrA17

sul1  
sul1

aadA5  
aadA5

qacEdelta1  
qacEdelta1

sul2  
sul2

tet(A)  
tet(A)

aph(3<sup>+</sup>)-Ib  
aph(3<sup>+</sup>)-Ib

aph(6)-Id  
aph(6)-Id

Demographic  
Adult Male  
Adult Female  
Child  
Unknown

Collection year  
2017-2019  
2015-2016  
Pre 2016  
Unknown

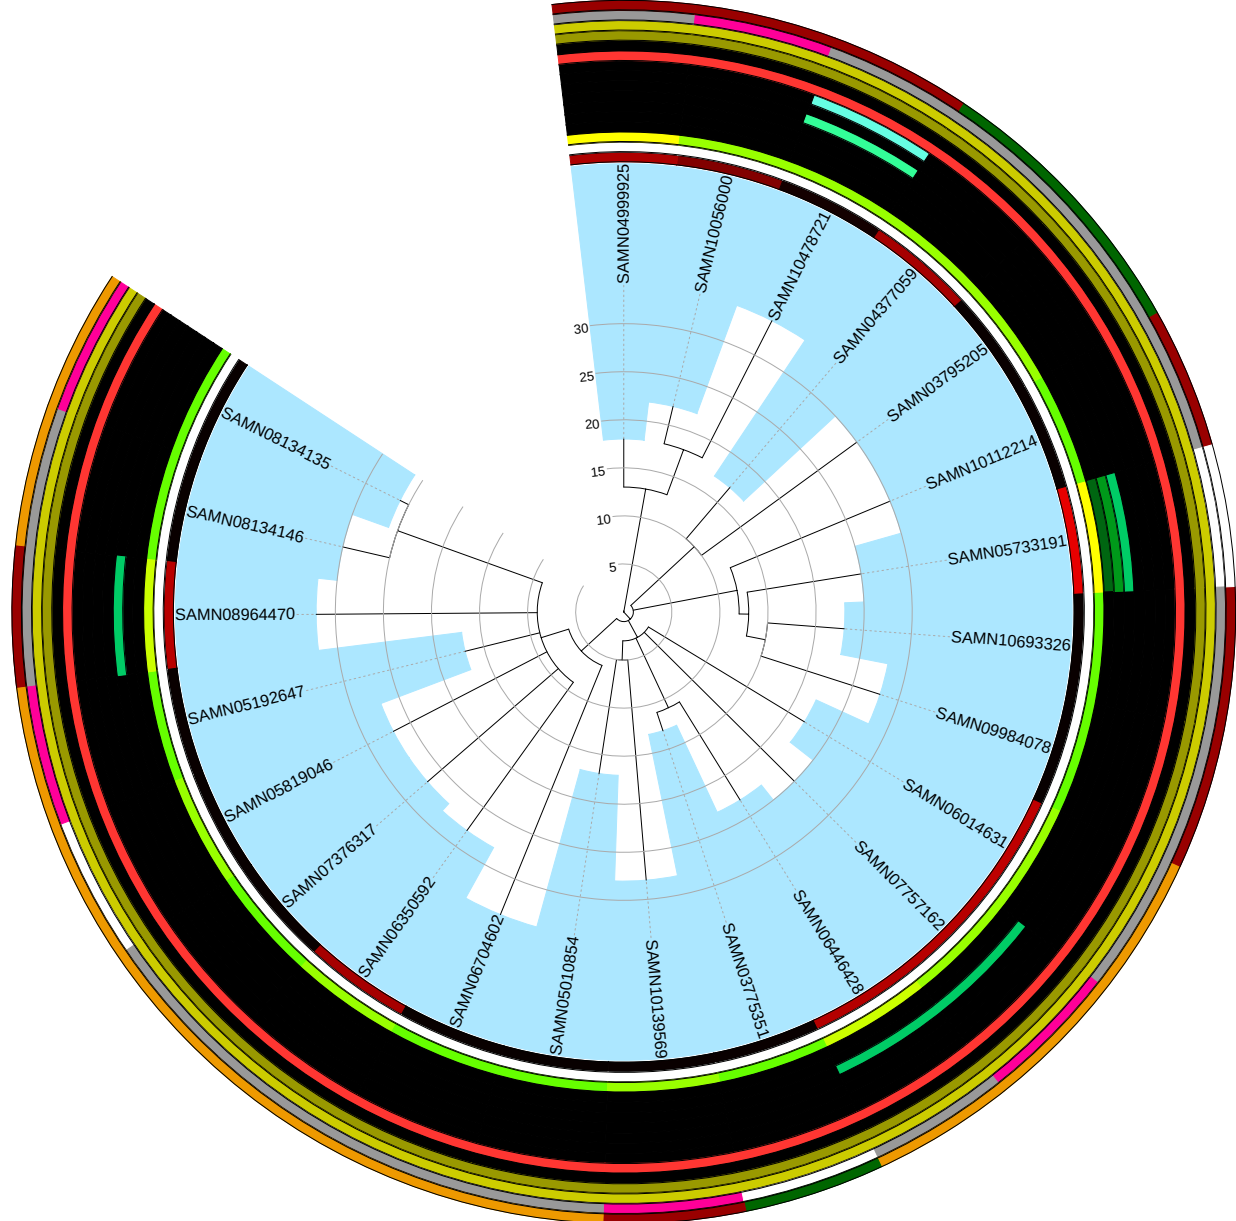

PDS000033550.7

Tree scale: 1

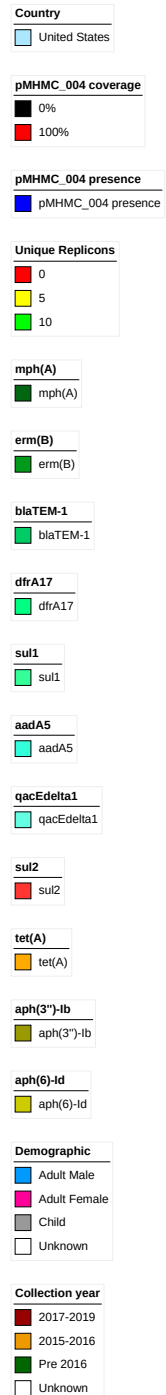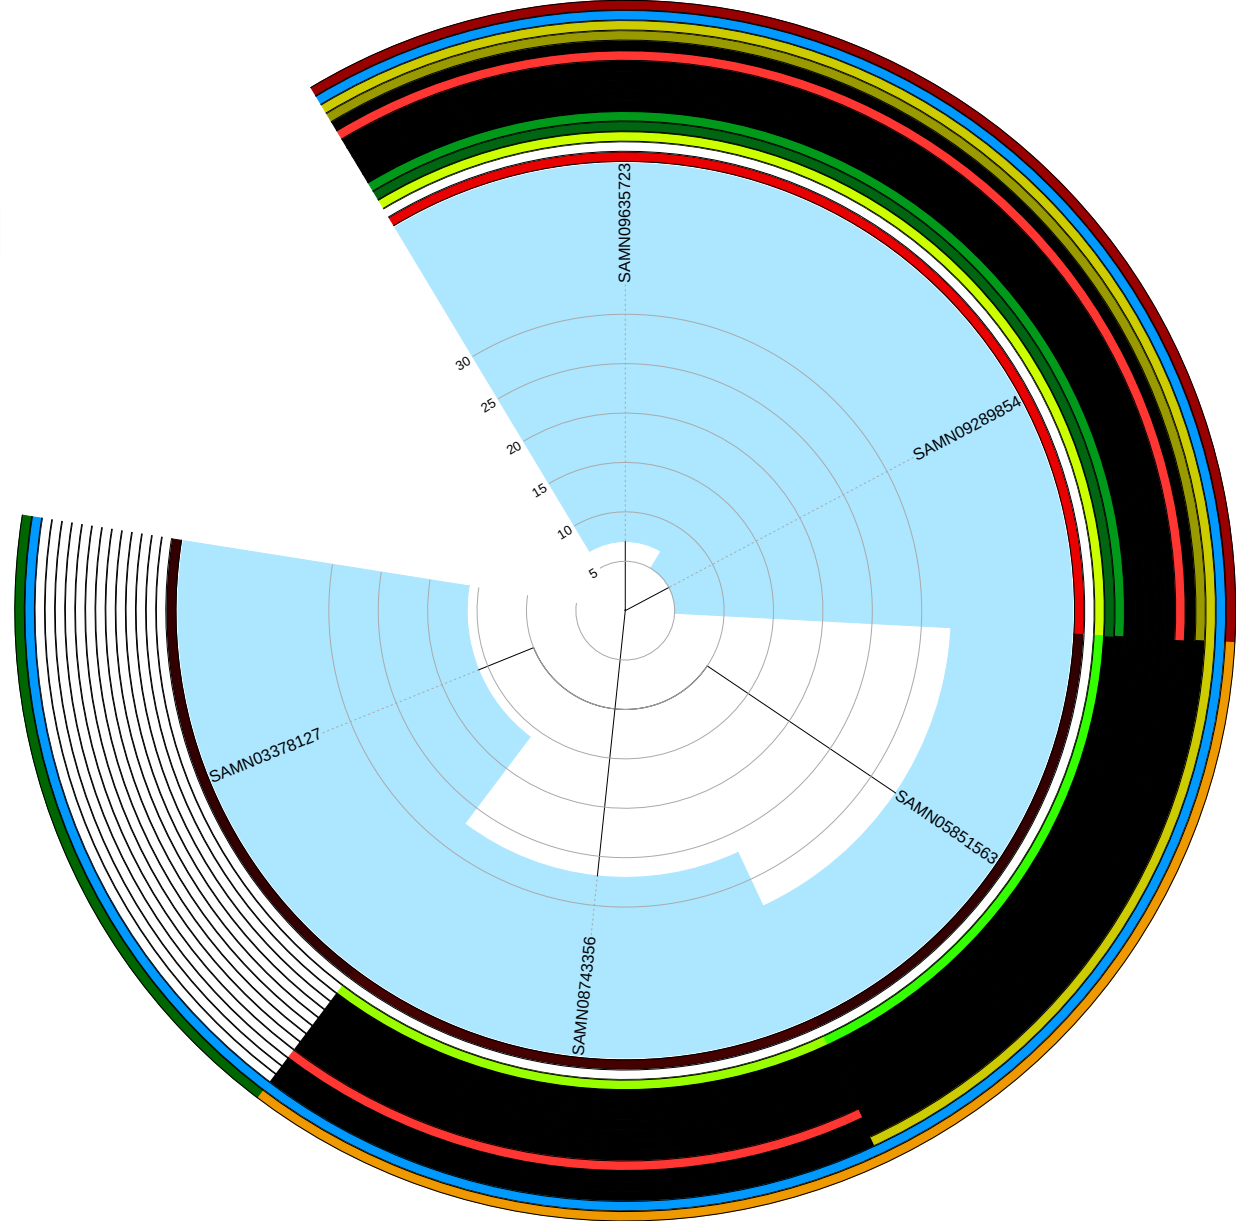

PDS000033562.4



Tree scale: 1

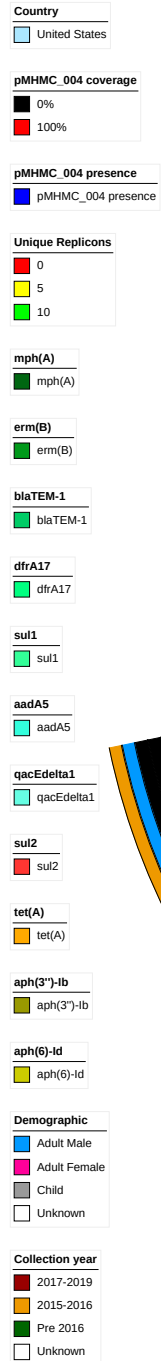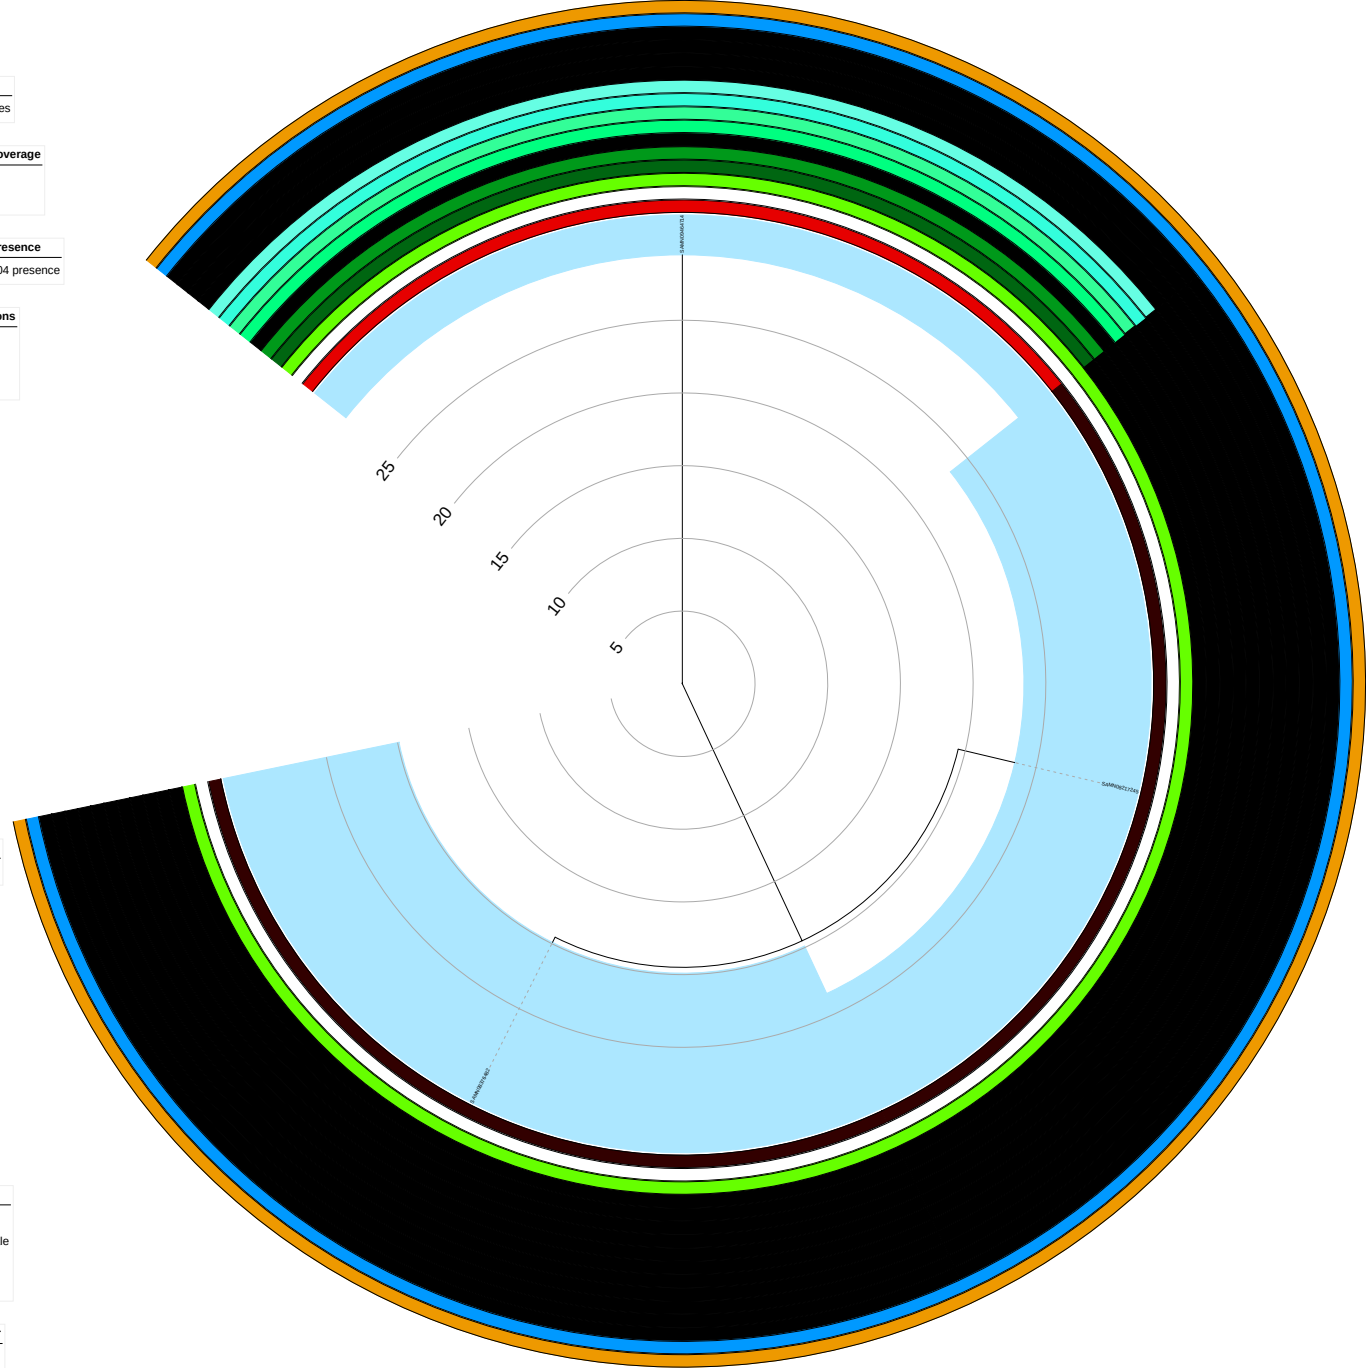

PDS000033573.4



Tree scale: 10

Country

United States

pMHMC\_004 coverage

0%

100%

pMHMC\_004 presence

pMHMC\_004 presence

Unique Replicons

0

5

10

mph(A)

mph(A)

erm(B)

erm(B)

blaTEM-1

blaTEM-1

dfrA17

dfrA17

sul1

sul1

aadA5

aadA5

qacEdelta1

qacEdelta1

sul2

sul2

tet(A)

tet(A)

aph(3<sup>+</sup>)-Ib

aph(3<sup>+</sup>)-Ib

aph(6)-Id

aph(6)-Id

Demographic

Adult Male

Adult Female

Child

Unknown

Collection year

2017-2019

2015-2016

Pre 2016

Unknown

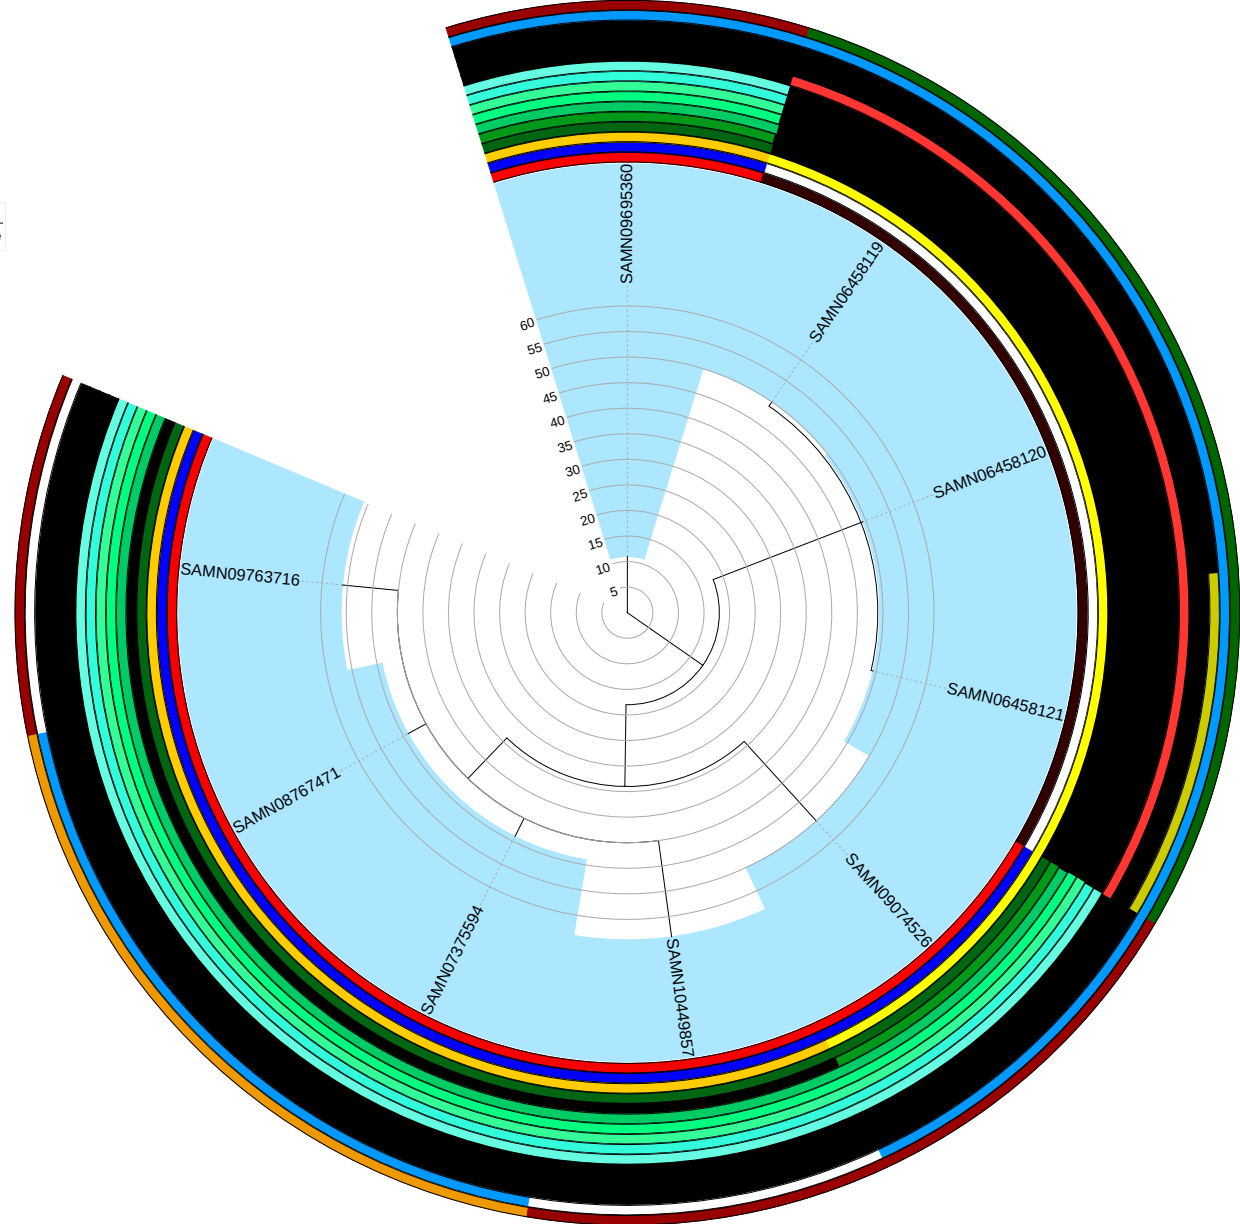

PDS000035106.4

Tree scale: 1

Country

- United States

pMHMC\_004 coverage

- 0%
- 100%

pMHMC\_004 presence

- pMHMC\_004 presence

Unique Replicons

- 0
- 5
- 10

mph(A)

- mph(A)

erm(B)

- erm(B)

blaTEM-1

- blaTEM-1

dfrA17

- dfrA17

sul1

- sul1

aadA5

- aadA5

qacEdelta1

- qacEdelta1

sul2

- sul2

tet(A)

- tet(A)

aph(3<sup>+</sup>)-Ib

- aph(3<sup>+</sup>)-Ib

aph(6)-Id

- aph(6)-Id

Demographic

- Adult Male
- Adult Female
- Child
- Unknown

Collection year

- 2017-2019
- 2015-2016
- Pre 2016
- Unknown

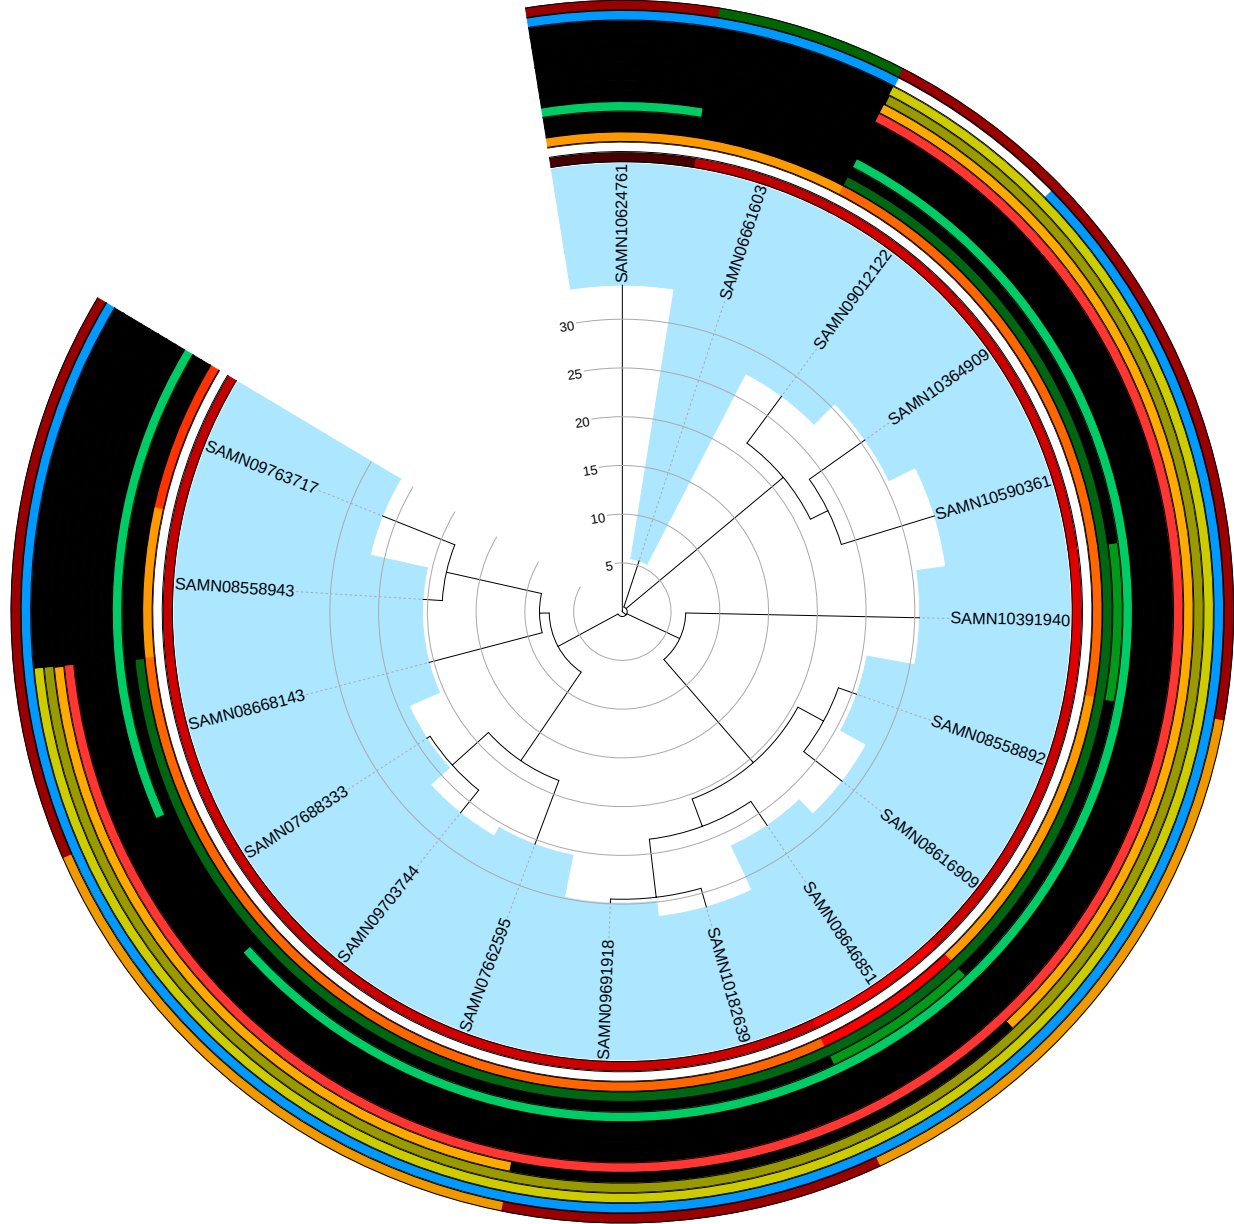

PDS000035107.7

Tree scale: 10

Country

- United States

pMHMC\_004 coverage

- 0%
- 100%

pMHMC\_004 presence

- pMHMC\_004 presence

Unique Replicons

- 0
- 5
- 10

mph(A)

- mph(A)

erm(B)

- erm(B)

blaTEM-1

- blaTEM-1

dfrA17

- dfrA17

sul1

- sul1

aadA5

- aadA5

qacEdelta1

- qacEdelta1

sul2

- sul2

tet(A)

- tet(A)

aph(3<sup>+</sup>)-Ib

- aph(3<sup>+</sup>)-Ib

aph(6)-Ic

- aph(6)-Ic

Demographic

- Adult Male
- Adult Female
- Child
- Unknown

Collection year

- 2017-2019
- 2015-2016
- Pre 2016
- Unknown

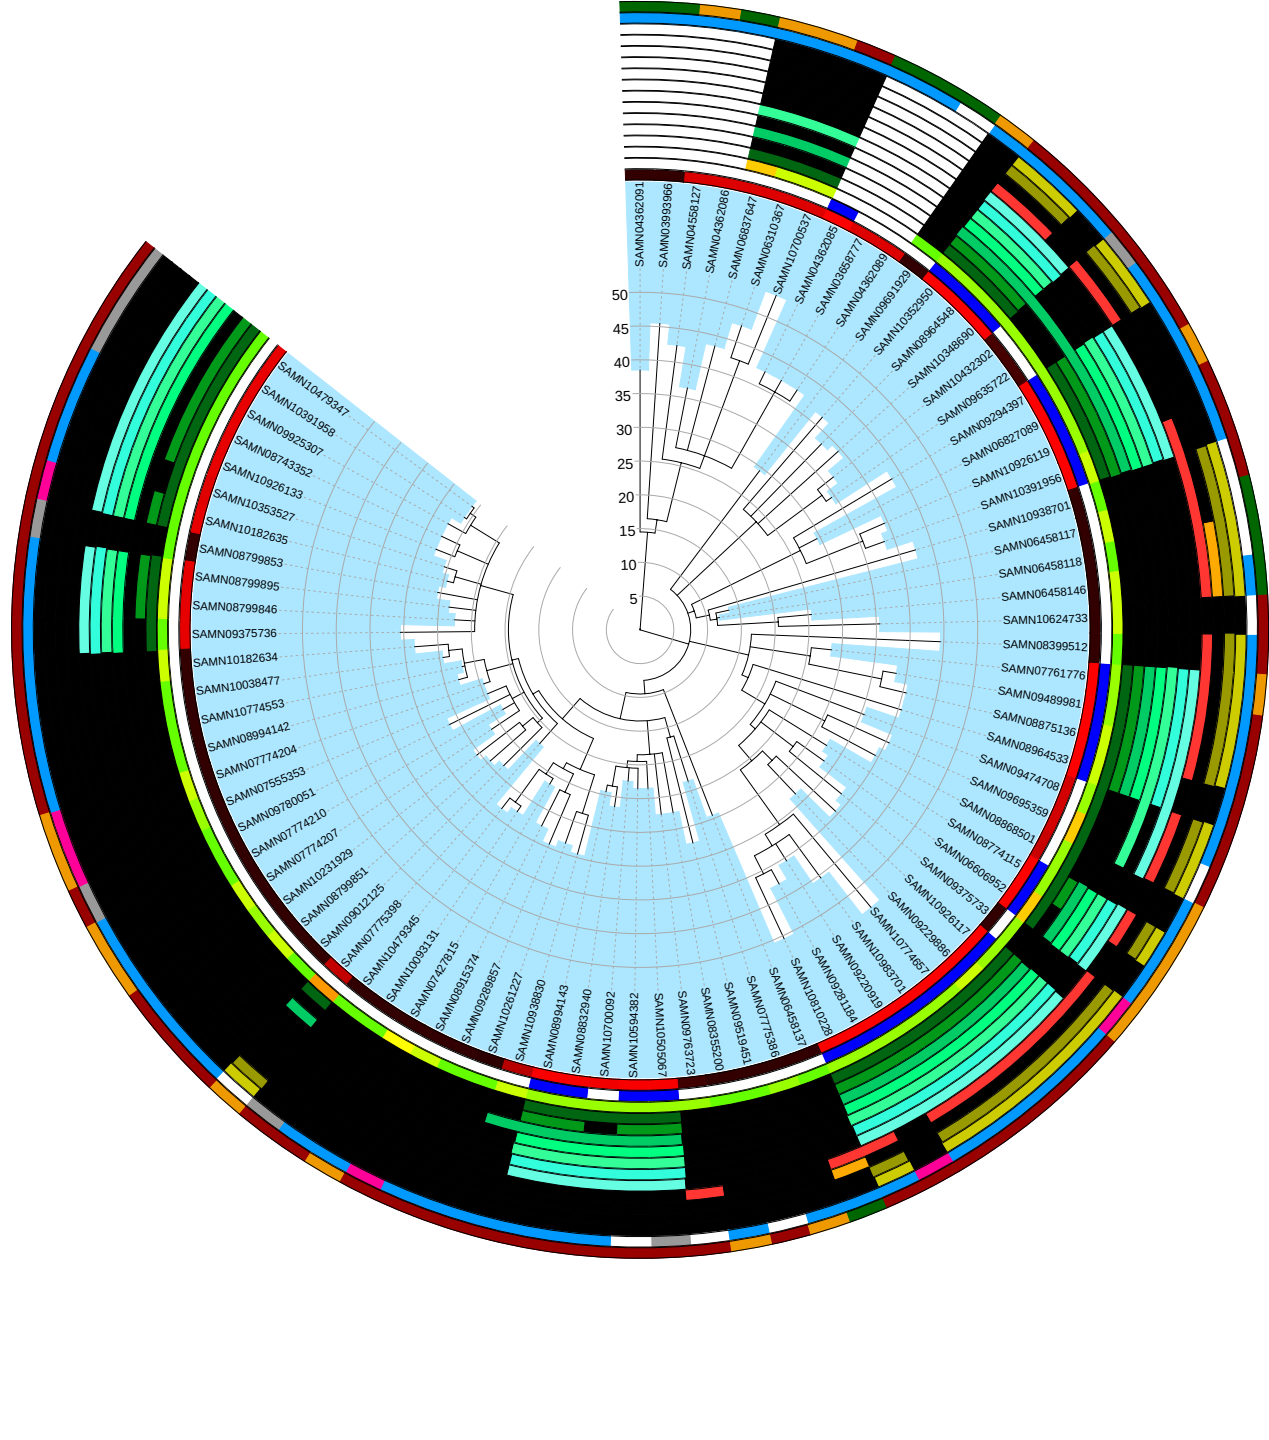

PDS000035108.28

Tree scale: 1 ←

**Country**  
United States

**pMHMC\_004 coverage**  
0%  
100%

**pMHMC\_004 presence**  
pMHMC\_004 presence

**Unique Replicons**  
0  
5  
10

**mph(A)**  
mph(A)

**erm(B)**  
erm(B)

**blaTEM-1**  
blaTEM-1

**dfrA17**  
dfrA17

**sul1**  
sul1

**aadA5**  
aadA5

**qacEdelta1**  
qac:Edelta1

**sul2**  
sul2

**tet(A)**  
tet(A)

**aph(3'')-Ib**  
aph(3'')-Ib

**aph(6)-Id**  
aph(6)-Id

**Demographic**  
Adult Male  
Adult Female  
Child  
Unknown

**Collection year**  
2017-2019  
2015-2016  
Pre 2016  
Unknown

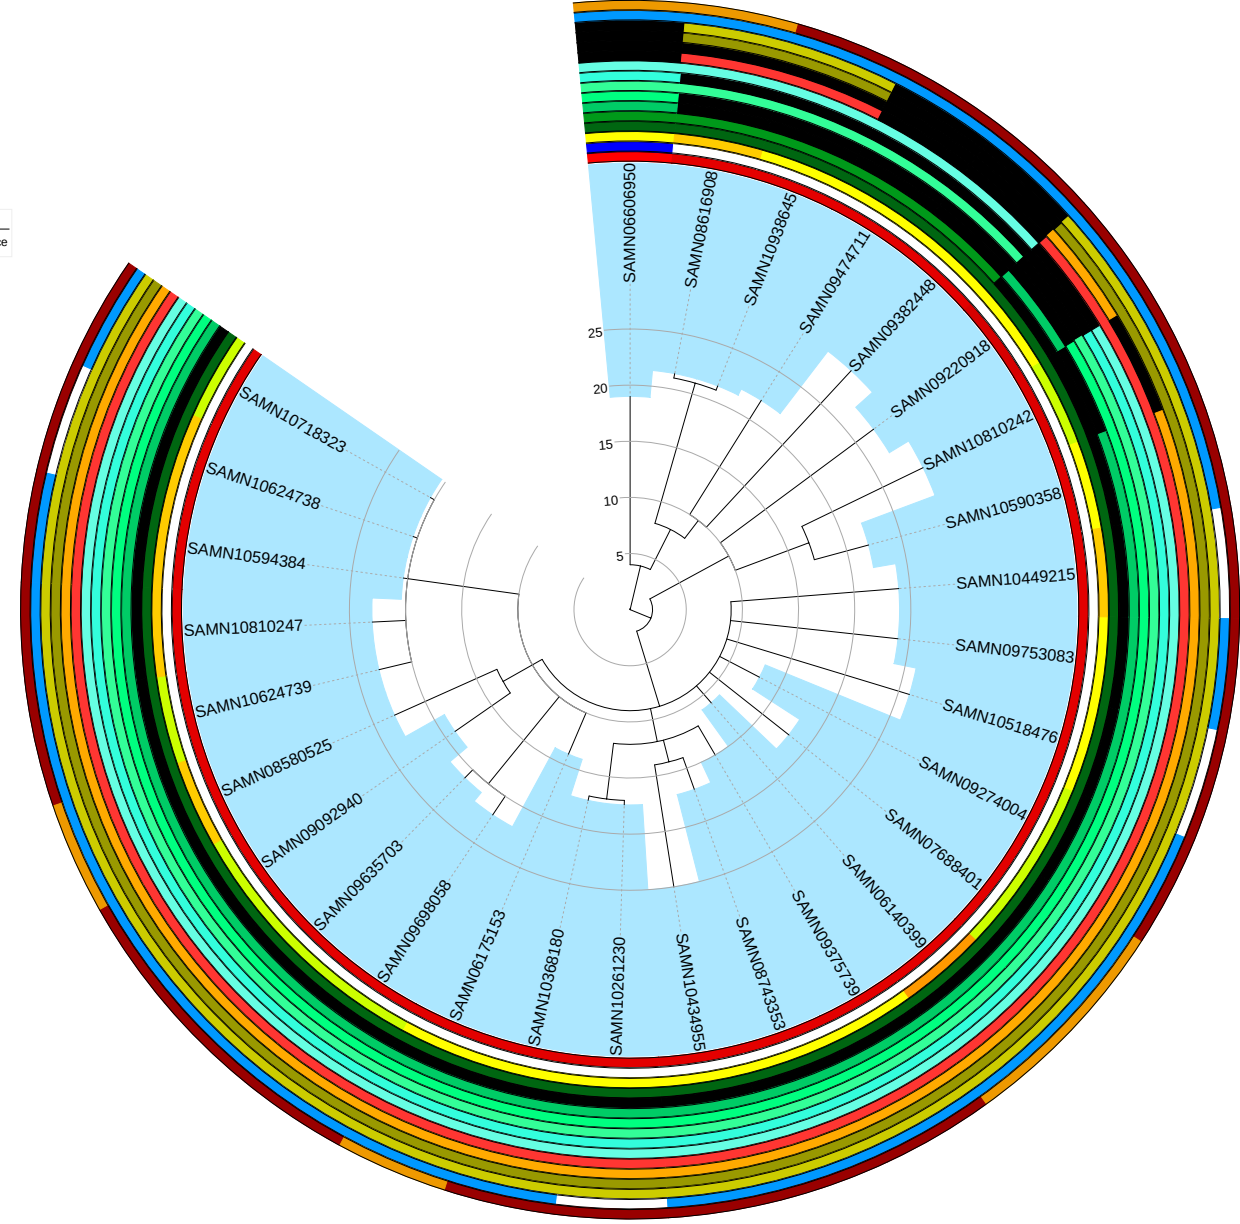

PDS000035123.15

Tree scale: 1

Country

United States

pMHMC\_004 coverage

0%  
100%

pMHMC\_004 presence

pMHMC\_004 presence

Unique Replicons

0  
5  
10

mph(A)

mph(A)

erm(B)

erm(B)

blaTEM-1

blaTEM-1

dfrA17

dfrA17

sul1

sul1

aadA5

aadA5

qacEdelta1

qacEdelta1

sul2

sul2

tet(A)

tet(A)

aph(3')-Ib

aph(3')-Ib

aph(6)-Id

aph(6)-Id

Demographic

Adult Male  
Adult Female  
Child  
Unknown

Collection year

2017-2019  
2015-2016  
Pre 2016  
Unknown

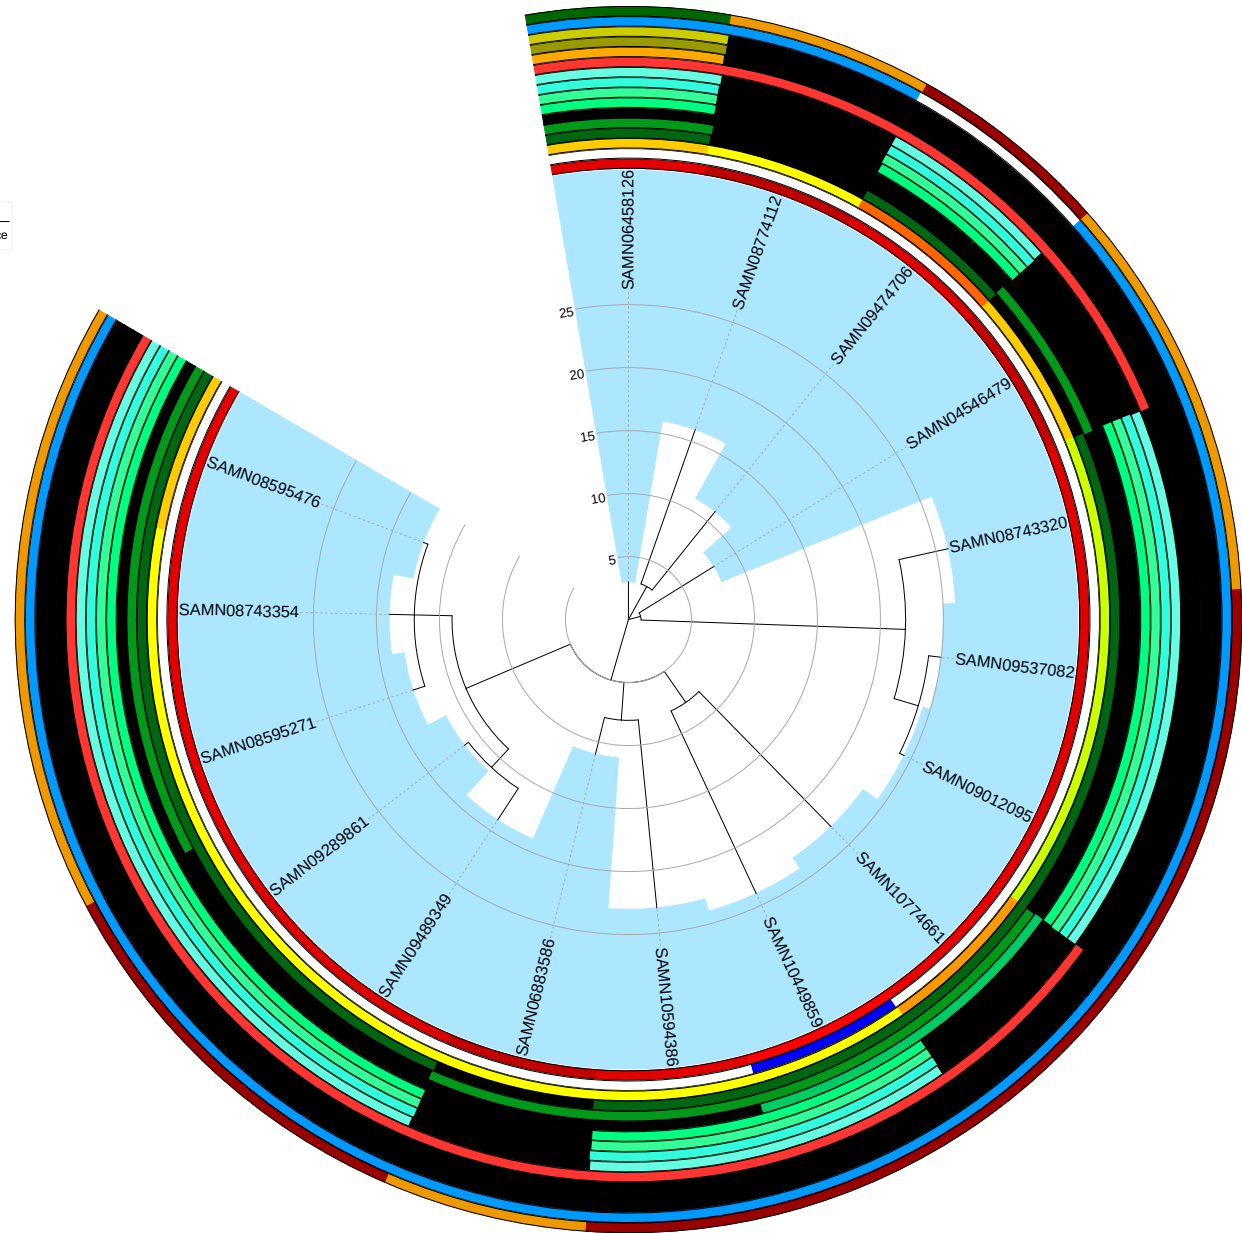

PDS000035124.4



Tree scale: 10

**Country**

United States

**pMHMC\_004 coverage**

0%  
100%

**pMHMC\_004 presence**

pMHMC\_004 presence

**Unique Replicons**

0  
5  
10

**mph(A)**

mph(A)

**erm(B)**

erm(B)

**blaTEM-1**

blaTEM-1

**dfrA17**

dfrA17

**sul1**

sul1

**aadA5**

aadA5

**qacEdelta1**

qacEdelta1

**sul2**

sul2

**tet(A)**

tet(A)

**aph(3')-Ib**

aph(3')-Ib

**aph(6)-Id**

aph(6)-Id

**Demographic**

Adult Male  
Adult Female  
Child  
Unknown

**Collection year**

2017-2019  
2015-2016  
Pre 2016  
Unknown

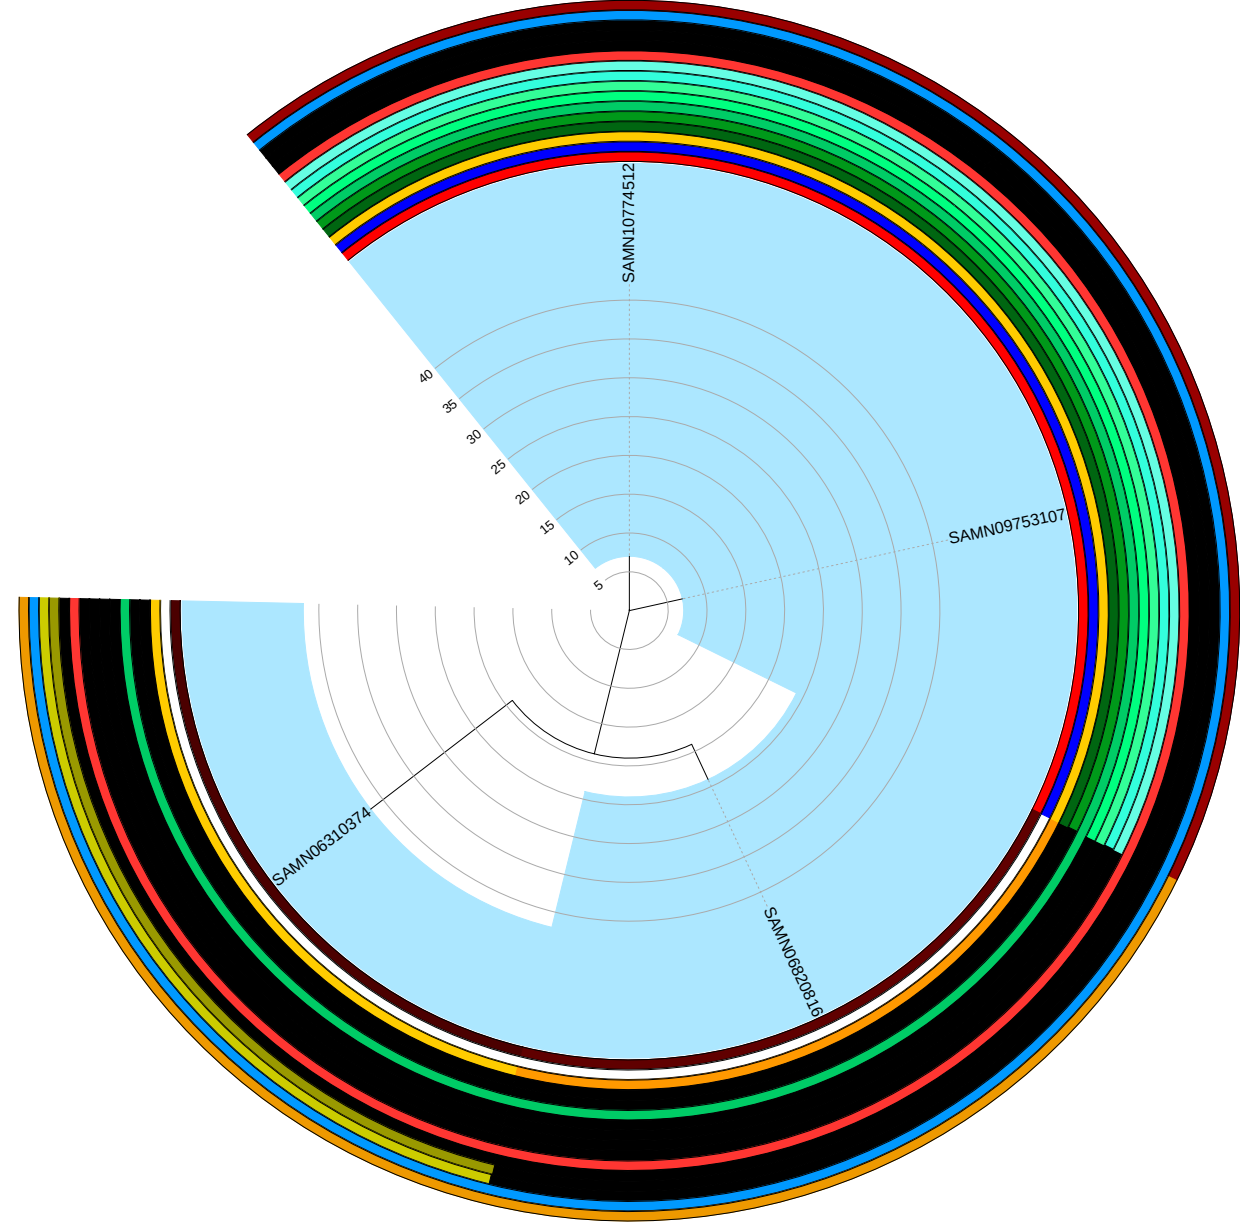

PDS000035185.2

Tree scale: 1

Country

United States

pMHMC\_004 coverage

0%  
100%

pMHMC\_004 presence

pMHMC\_004 presence

Unique Replicons

0  
5  
10

mph(A)

mph(A)

erm(B)

erm(B)

blaTEM-1

blaTEM-1

dfrA17

dfrA17

sul1

sul1

aadA5

aadA5

qacEdelta1

qacEdelta1

sul2

sul2

tet(A)

tet(A)

aph(3'')-Ib

aph(3'')-Ib

aph(6)-Id

aph(6)-Id

Demographic

Adult Male  
Adult Female  
Child  
Unknown

Collection year

2017-2019  
2015-2016  
Pre 2016  
Unknown

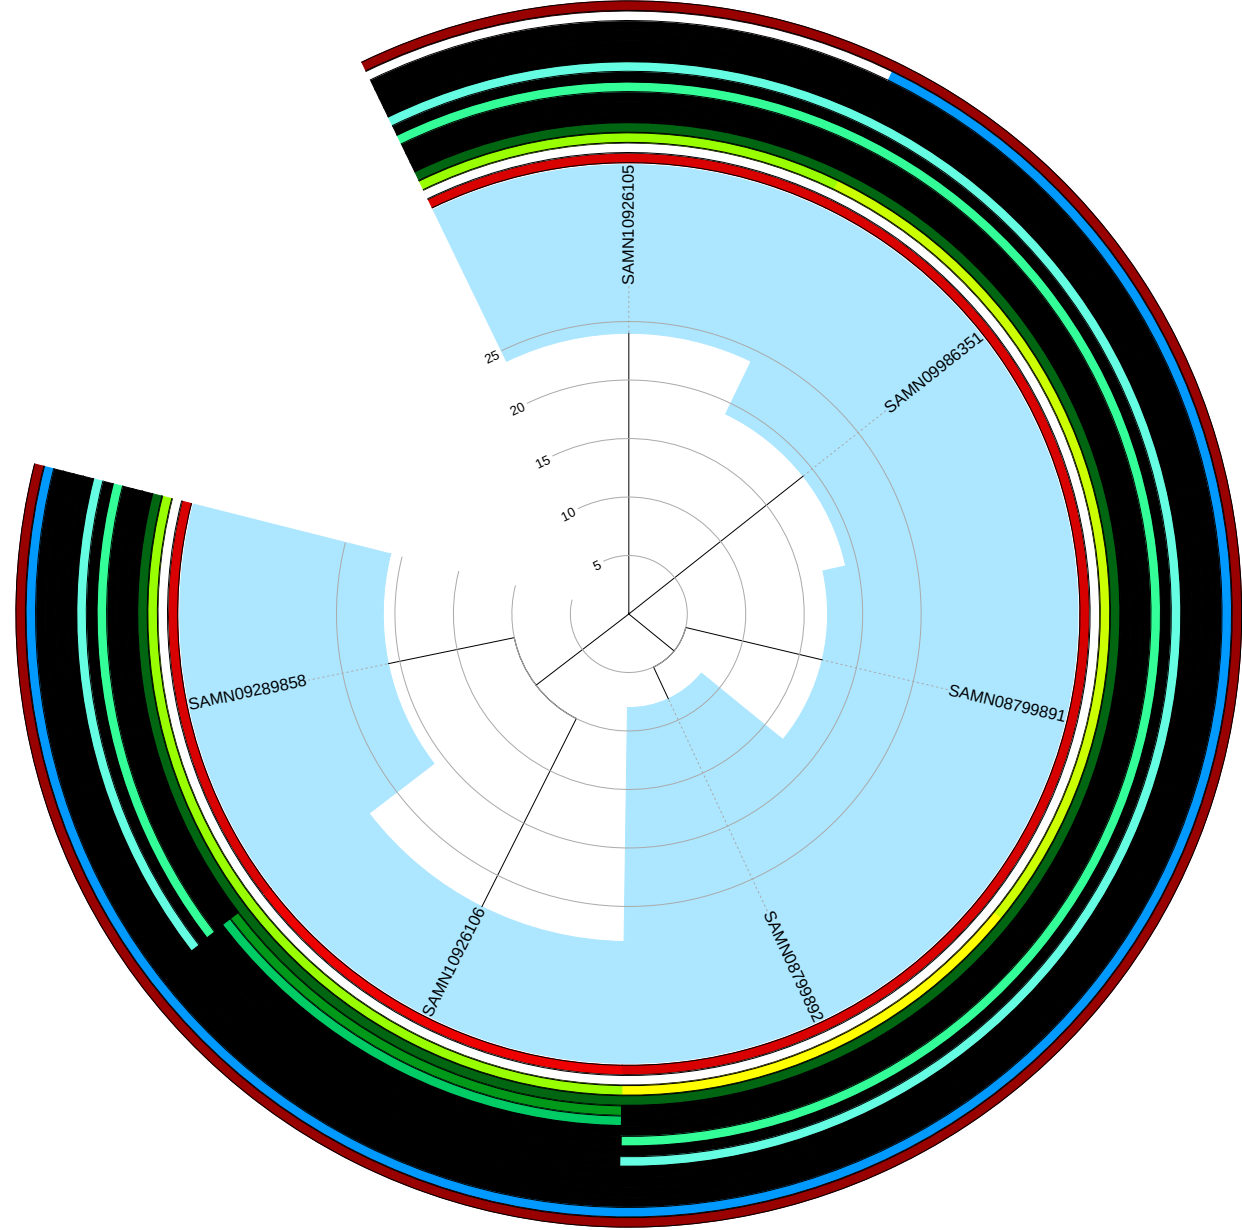

PDS000035186.3

Tree scale: 10

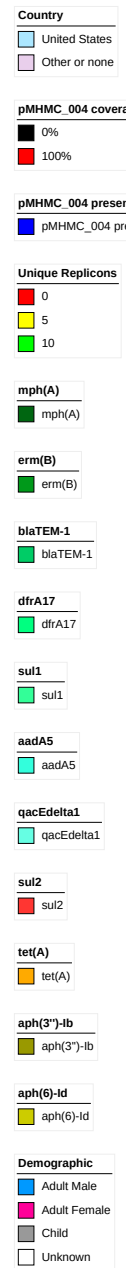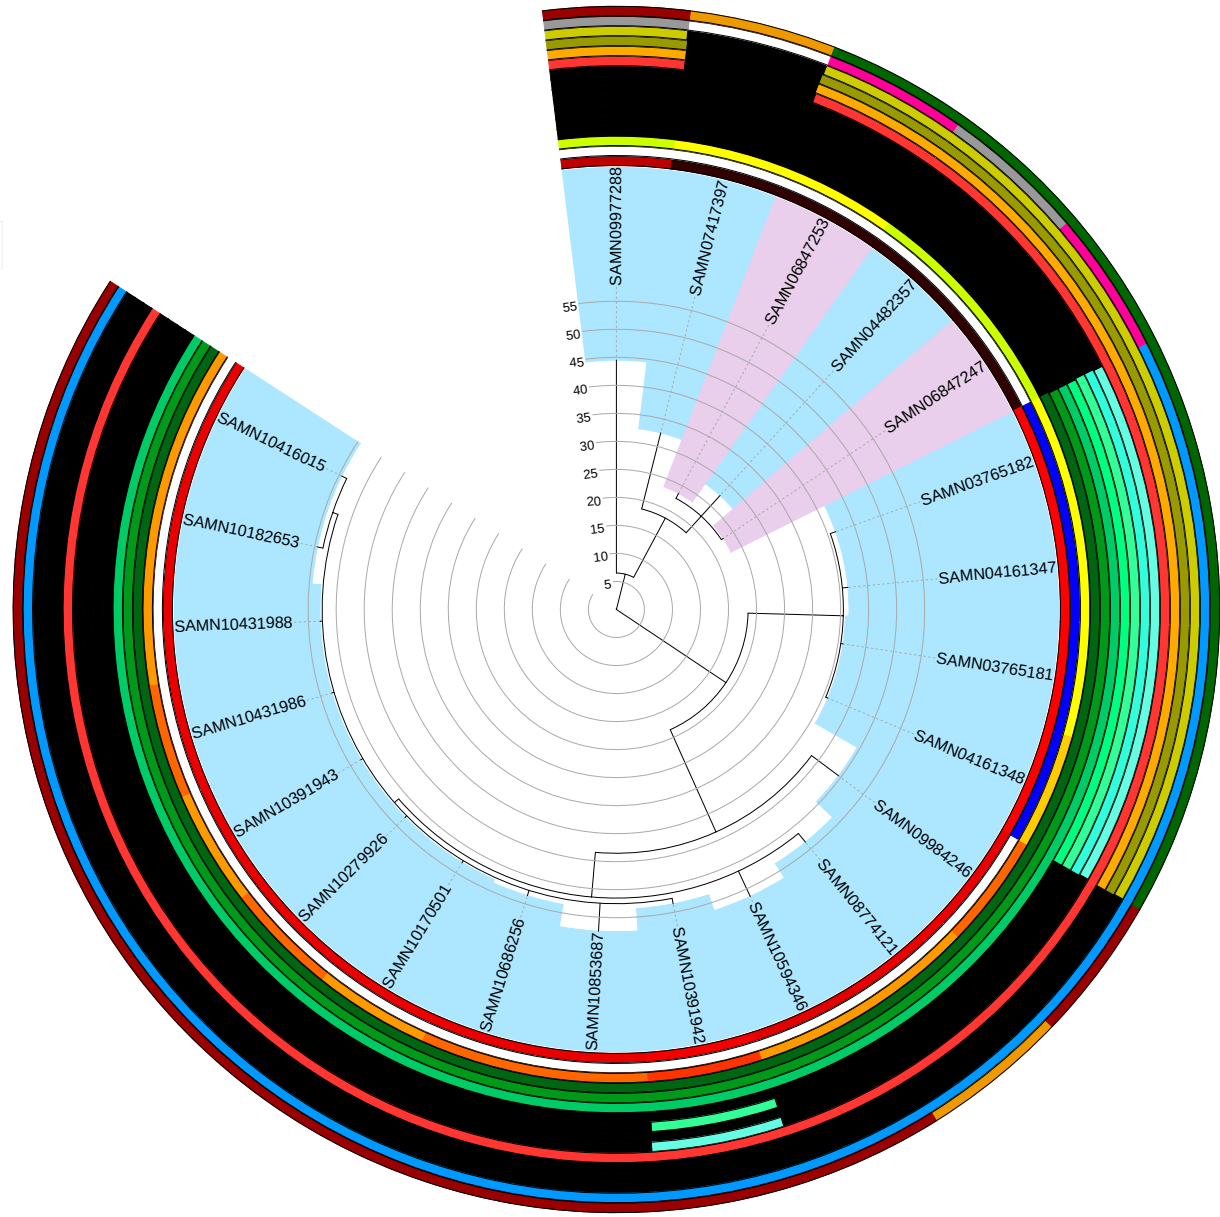

PDS000035344.47

Tree scale: 1

Country

United States

pMHMC\_004 coverage

0%

100%

pMHMC\_004 presence

pMHMC\_004 presence

Unique Replicons

0

5

10

mph(A)

mph(A)

erm(B)

erm(B)

blaTEM-1

blaTEM-1

dfrA17

dfrA17

sul1

sul1

aadA5

aadA5

qacEdelta1

qacEdelta1

sul2

sul2

tet(A)

tet(A)

aph(3<sup>+</sup>)-Ib

aph(3<sup>+</sup>)-Ib

aph(6)-Id

aph(6)-Id

Demographic

Adult Male

Adult Female

Child

Unknown

Collection year

2017-2019

2015-2016

Pre 2016

Unknown

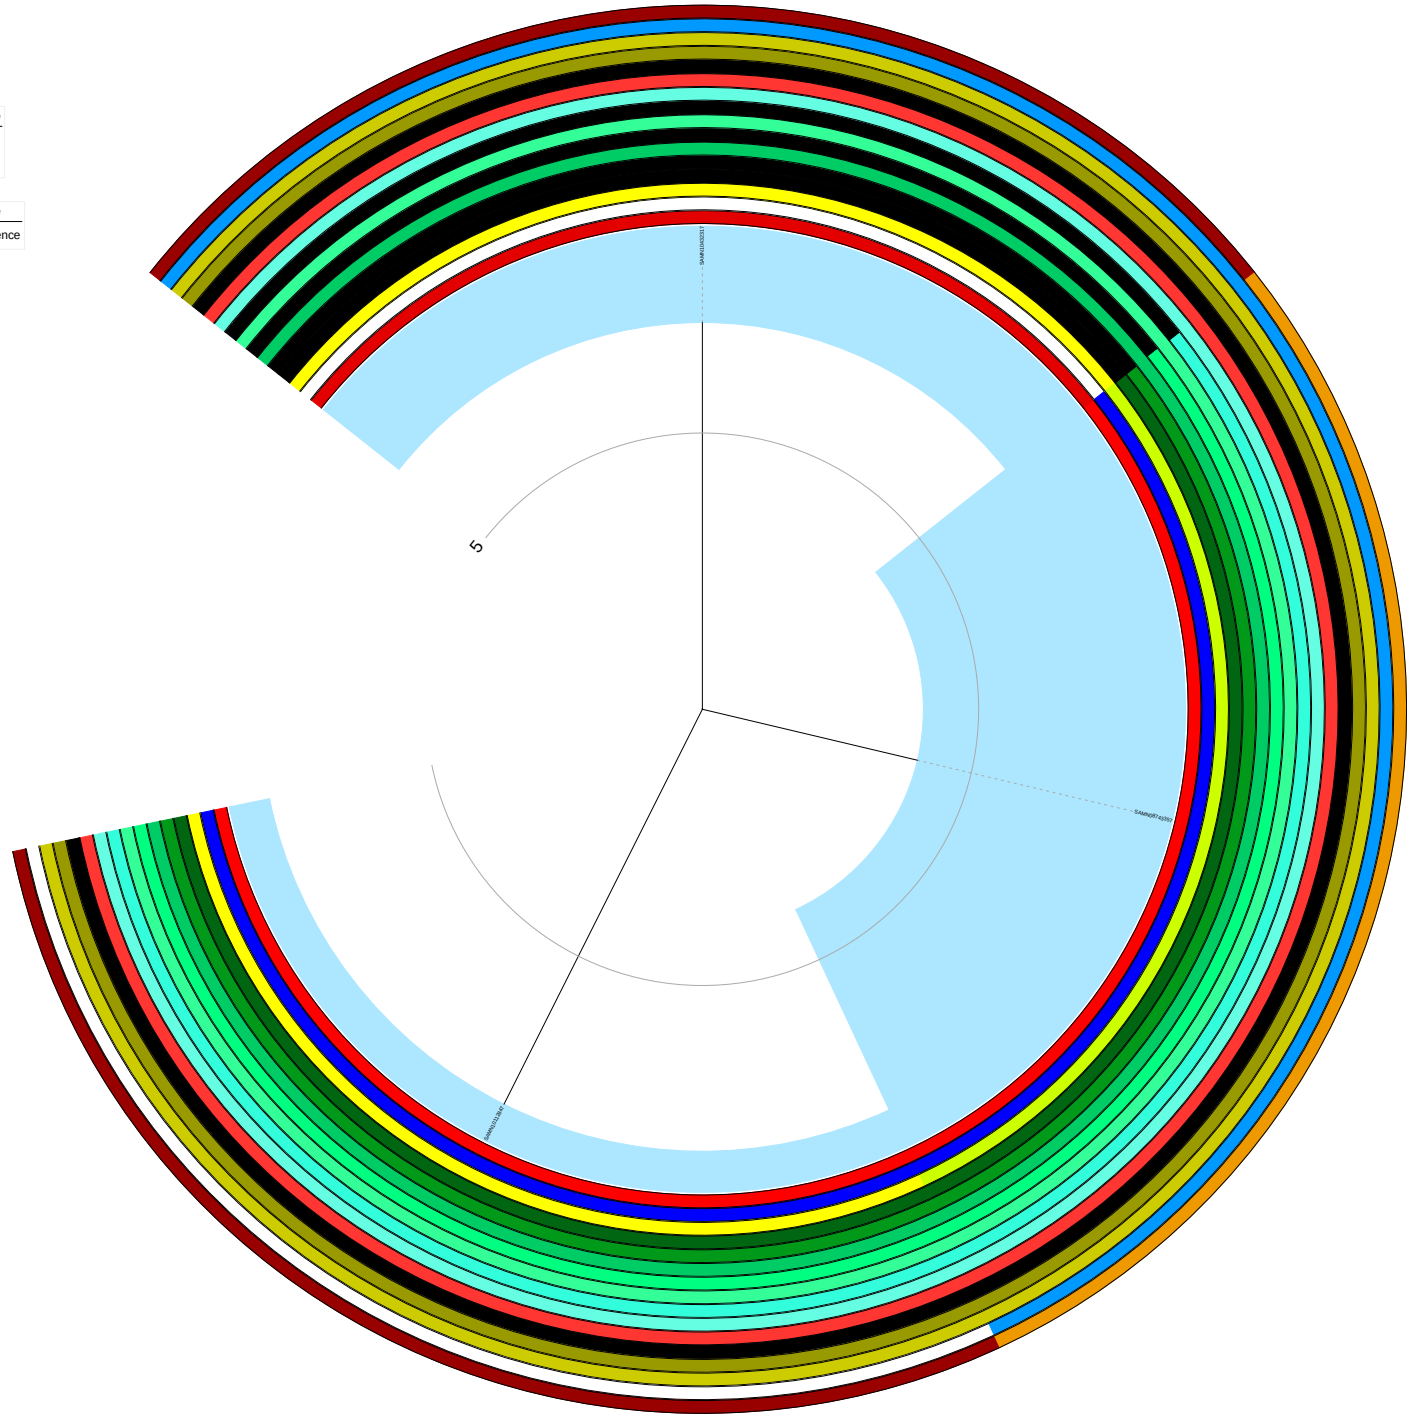

PDS000037165.2

Tree scale: 1

**Country**  
United States

**pMHMC\_004 coverage**  
0%  
100%

**pMHMC\_004 presence**  
pMHMC\_004 presence

**Unique Replicons**  
0  
5  
10

**mph(A)**  
mph(A)

**erm(B)**  
erm(B)

**blaTEM-1**  
blaTEM-1

**dfrA17**  
dfrA17

**sul1**  
sul1

**aadA5**  
aadA5

**qacEdelta1**  
qacEdelta1

**sul2**  
sul2

**tet(A)**  
tet(A)

**aph(3')-Ib**  
aph(3')-Ib

**aph(6)-Id**  
aph(6)-Id

**Demographic**  
Adult Male  
Adult Female  
Child  
Unknown

**Collection year**  
2017-2019  
2015-2016  
Pre 2016  
Unknown

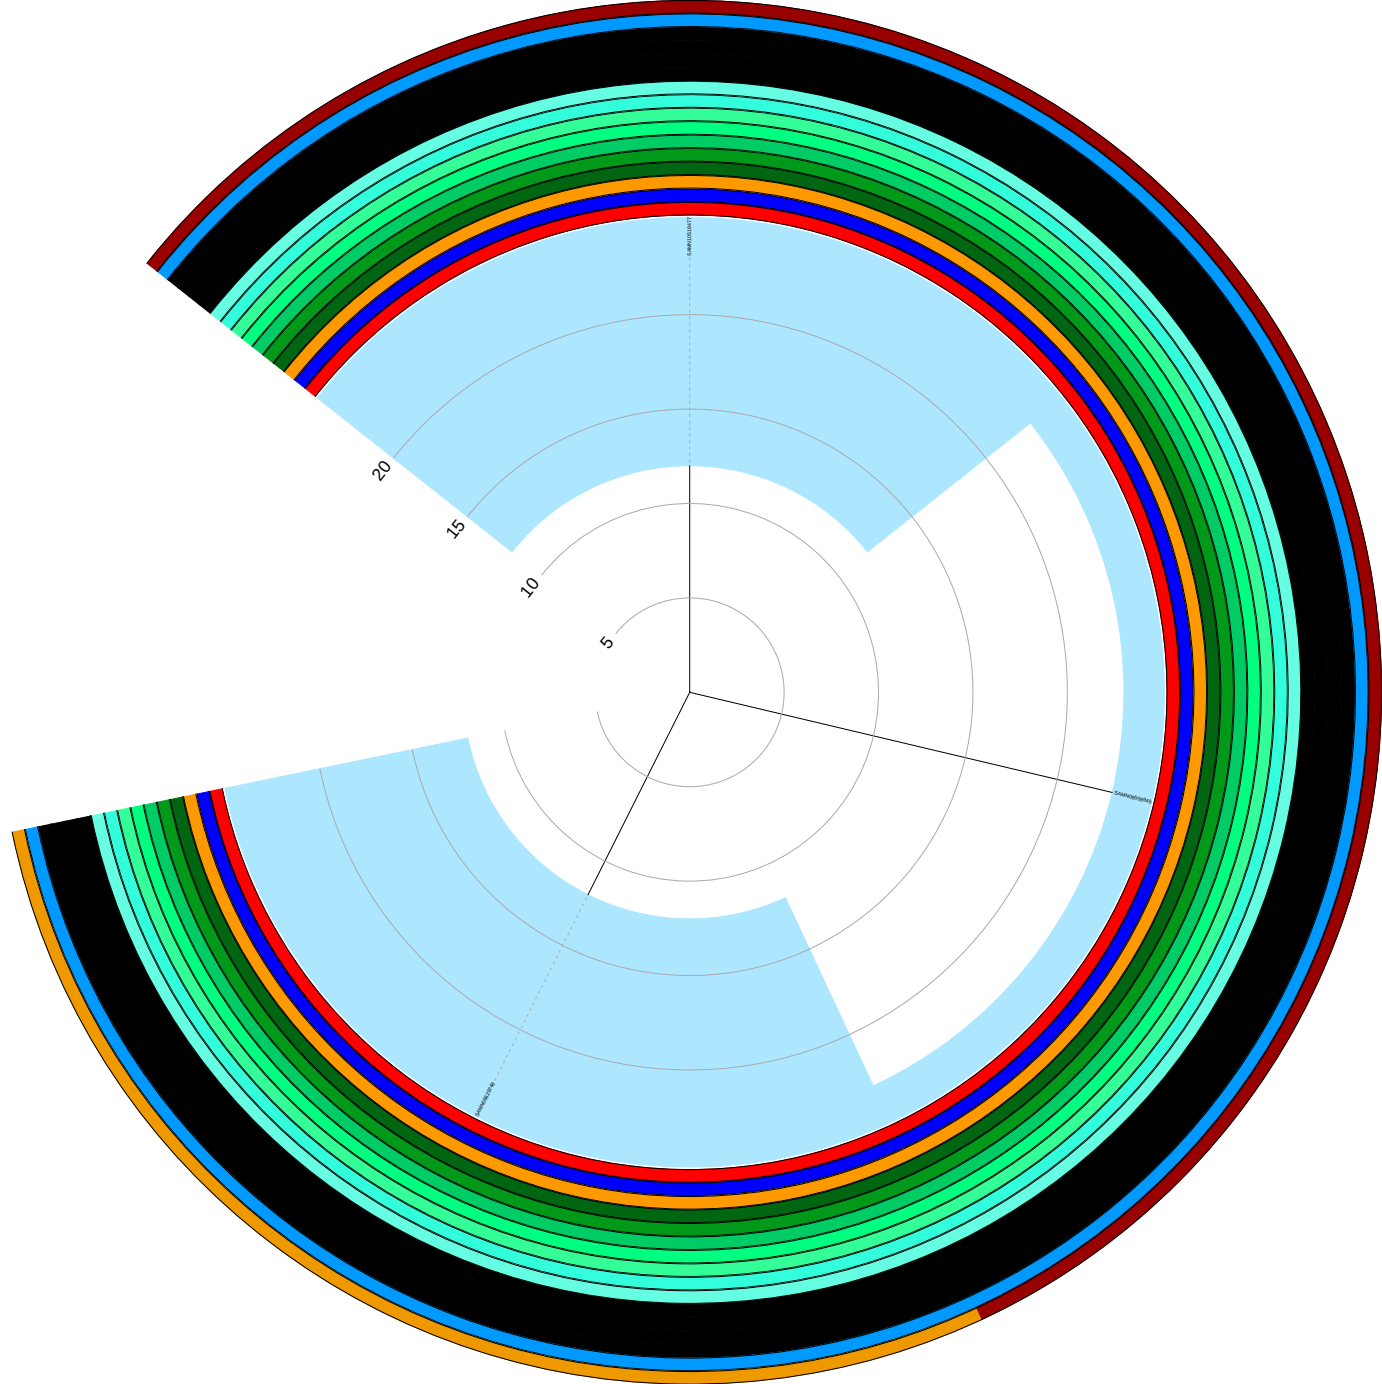

PDS000039050.1



Tree scale: 1

**Country**

United States

**pMHMC\_004 coverage**

0%

100%

**pMHMC\_004 presence**

pMHMC\_004 presence

**Unique Replicons**

0

5

10

**mph(A)**

mph(A)

**erm(B)**

erm(B)

**blaTEM-1**

blaTEM-1

**dfrA17**

dfrA17

**sul1**

sul1

**aadA5**

aadA5

**qacEdelta1**

qacEdelta1

**sul2**

sul2

**tet(A)**

tet(A)

**aph(3<sup>+</sup>)-Ib**

aph(3<sup>+</sup>)-Ib

**aph(6)-Id**

aph(6)-Id

**Demographic**

Adult Male

Adult Female

Child

Unknown

**Collection year**

2017-2019

2015-2016

Pre 2016

Unknown

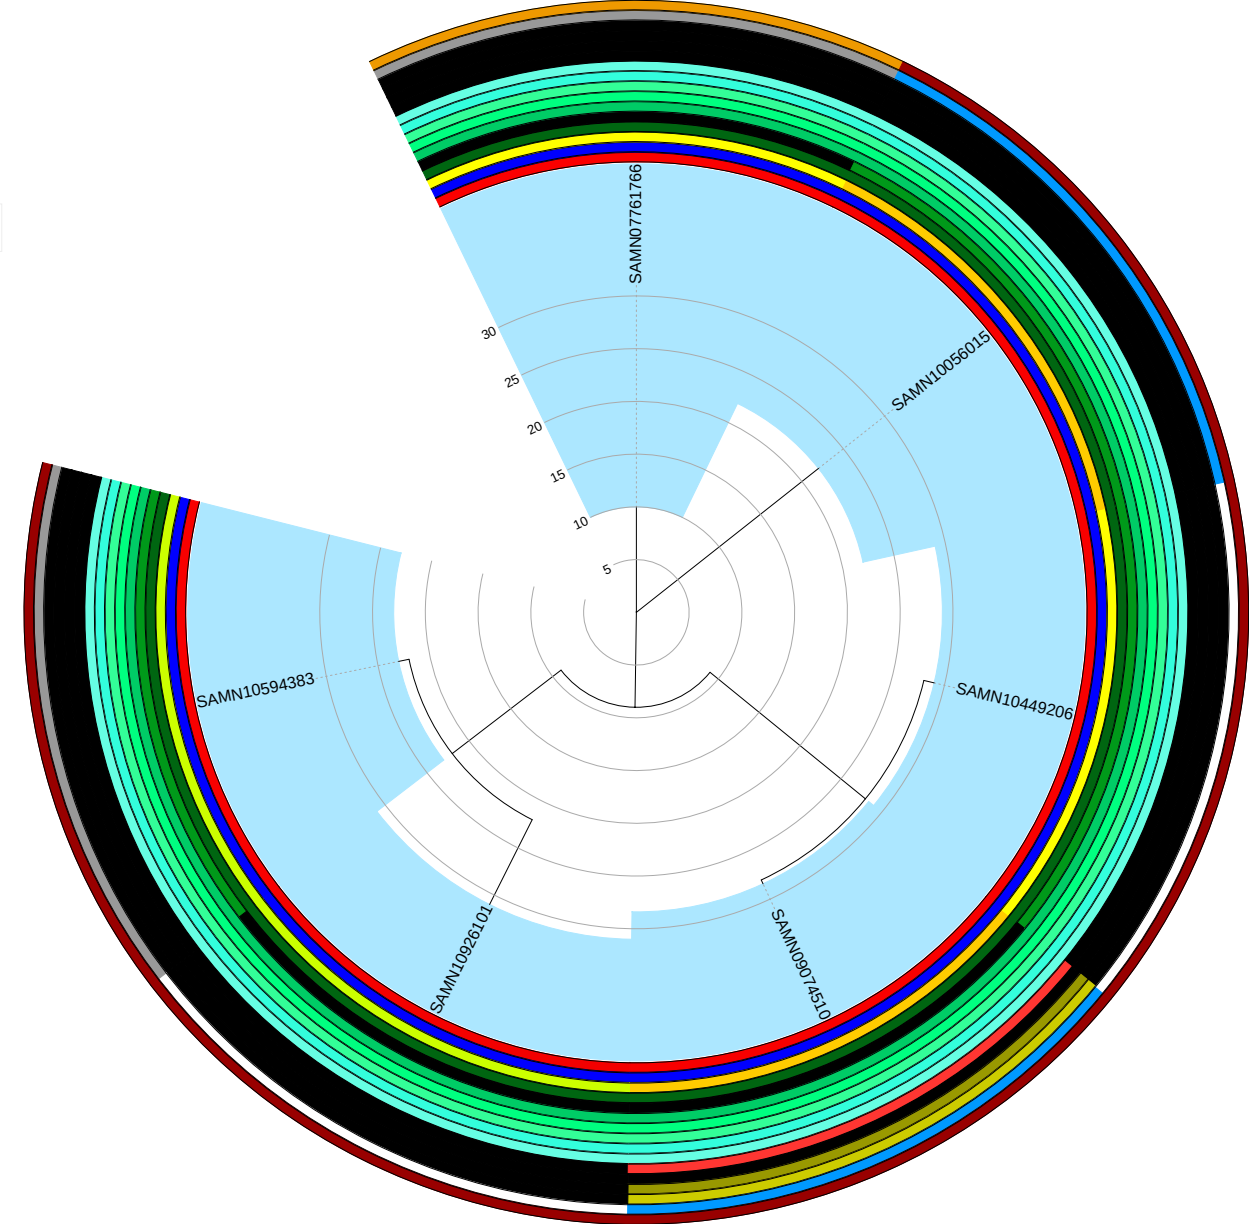

PDS000039286.2
