# Supplementary material
Source: PubMed Central journal article supplement (PMC7858064)
Supplement: mBio.03188-20-sf001.pdf [file mBio.03188-20-sf001.pdf]

# Supplementary Figure S1

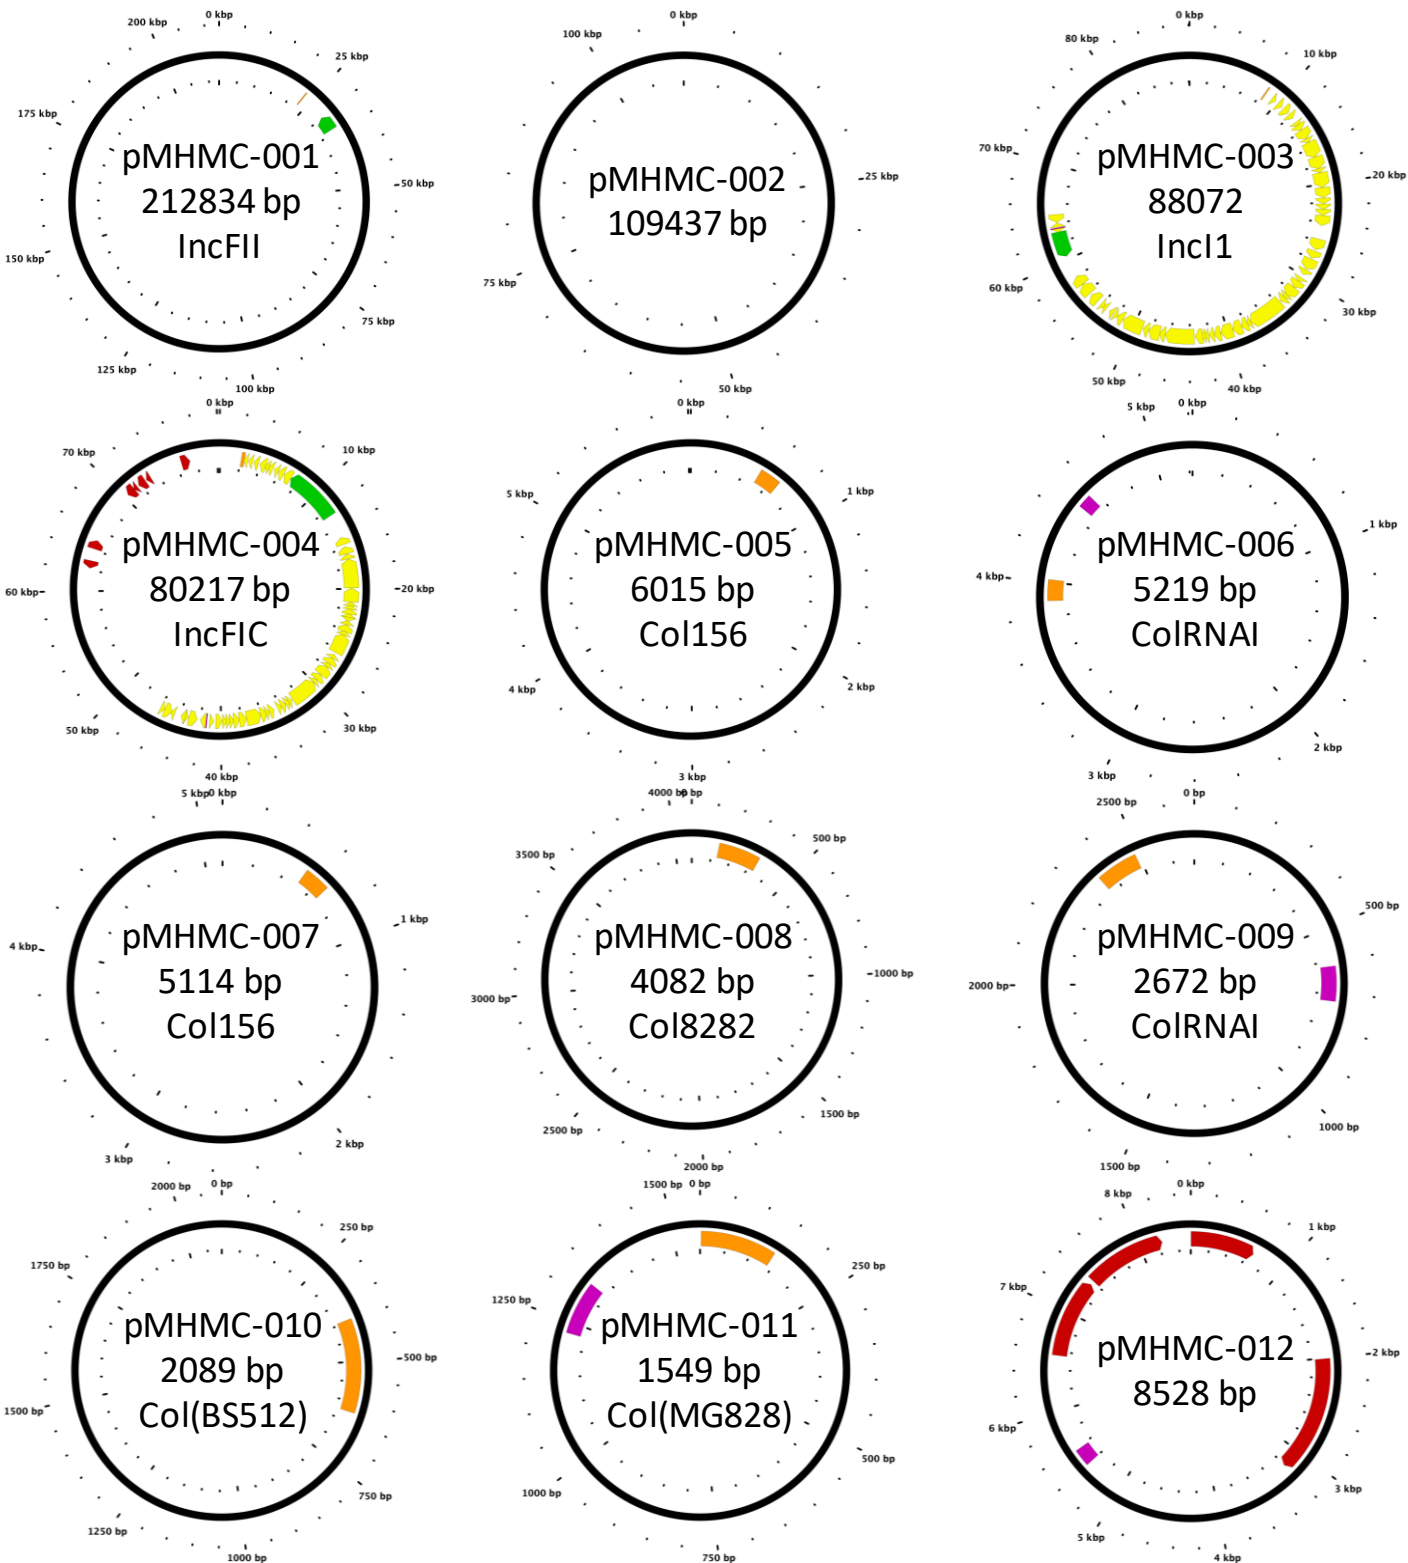

■ T4SS genes

■ Relaxase

■ AMR genes

■ *oriT*

■ *oriV*

**Supplementary Figure S1: The twelve plasmids of *S. sonnei* SBJ-9962.** Genes and genetic features are labeled as directional arrows and boxes, respectively, in the inner circle for selected gene categories. Only pMHMC-003 and pMHMC-004 encode a putative T4SS, while those plus pMHMC-006, pMHMC-009, pMHMC-011, and pMHMC-012 encode a known origin of transfer. Two plasmids encode known AMR genes, pMHMC-004 and pMHMC-012. Most plasmids encoded a typical replicon, with the larger plasmids having Inc type replicons, and the smaller plasmids having Col type replicons.
