# Supplementary material
Source: PubMed Central journal article supplement (PMC7858064)
Supplement: mBio.03188-20-sf002.pdf [file mBio.03188-20-sf002.pdf]

*S. sonnei*  
PDS000033428.133  
1316 strains

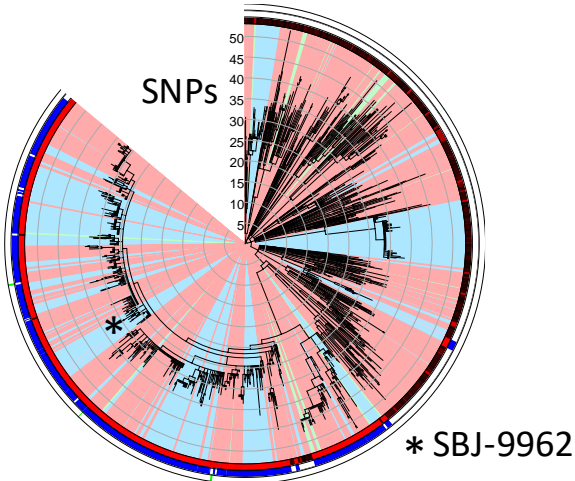

*S. sonnei*  
PDS000004492.71  
250 strains

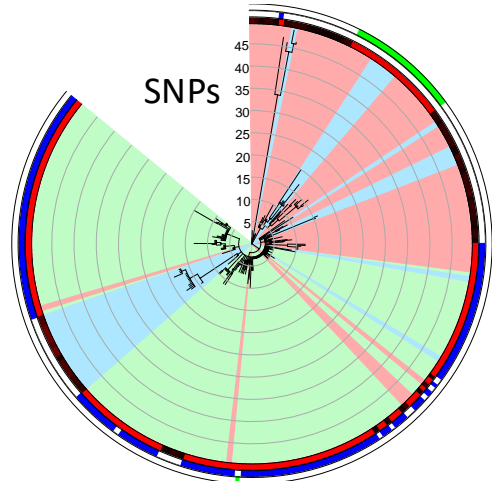

*S. sonnei*  
PDS000033340.81  
741 strains

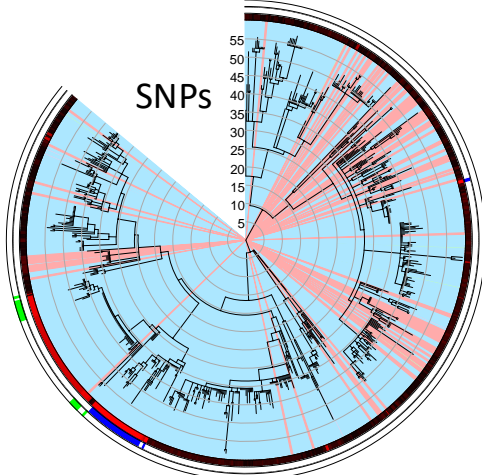

*S. sonnei*  
PDS000035344.47  
298 strains

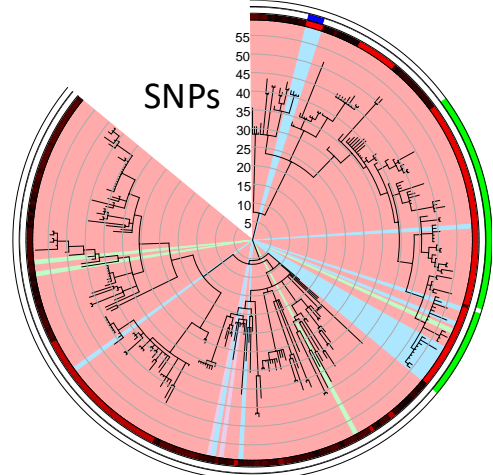

*S. flexneri*  
PDS000007822.142  
275 strains

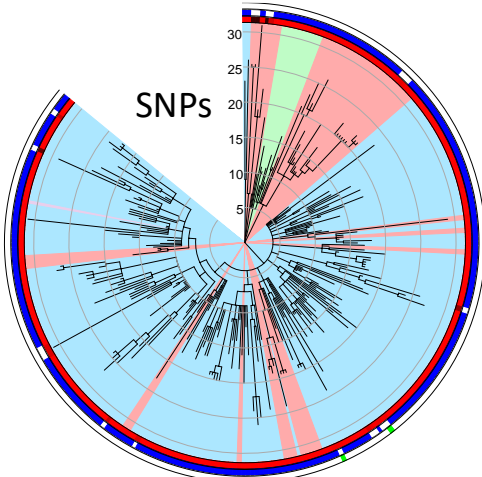

*S. flexneri*  
PDS000006028.122  
583 strains

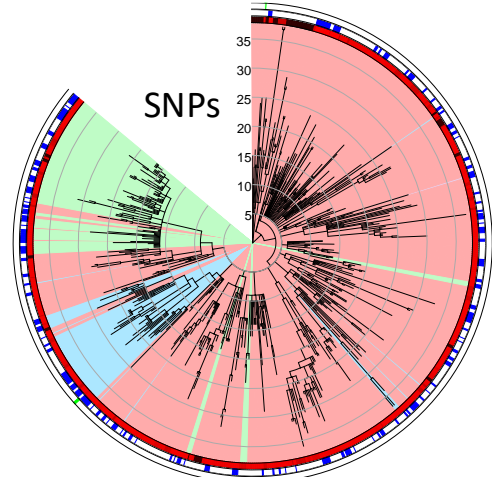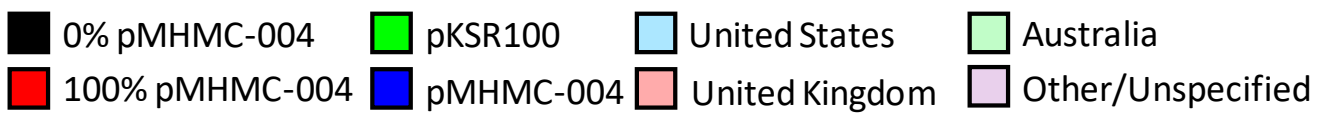

**Supplementary Figure S2: Large SNP-defined groups of *S. sonnei* and *S. flexneri* intercontinental transmission and plasmid acquisition and loss events.** pMHMC-004 and pKSR100 presence is indicated in the exterior two rings. Total plasmid coverage is shown by a gradient in the first ring outside the dendrogram. Country of origin is shown for the United States, United Kingdom, and Australia. Other countries of origin and those without specified origins are grouped together in a fourth category.
