# Supplementary material
Source: PubMed Central journal article supplement (PMC7858064)
Supplement: mBio.03188-20-sf003.pdf [file mBio.03188-20-sf003.pdf]

**pMHMC-004**  
*qacEΔ1*  
*aadA5*  
*sul1*  
*dfrA17*  
*blaTEM-1*  
*erm(B)*  
*mph(A)*

**pMHMC-012**  
*aph(6)-I<sub>d</sub>*  
*aph(3'')-I<sub>b</sub>*  
*tet(A)*  
*sul2*

Presence  
Coverage

SNPs

50  
45  
40  
35  
30  
25  
20  
15  
10  
5

\*

**AMR genes**

- pMHMC-004
- pMHMC-012
- Absent
- No data

**pMHMC Presence**

- pMHMC-004
- No pMHMC-004

**pMHMC-004 coverage**

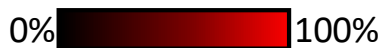

**Sentinel Strain**

\* SBJ-9962

**Clade name**

- Adult-male associated 1a
- Adult-male associated 1b
- Adult-male associated 2
- Adult-male associated 3
- Adult-male associated 4
- Adult-male associated 5
- Non-adult-male associated

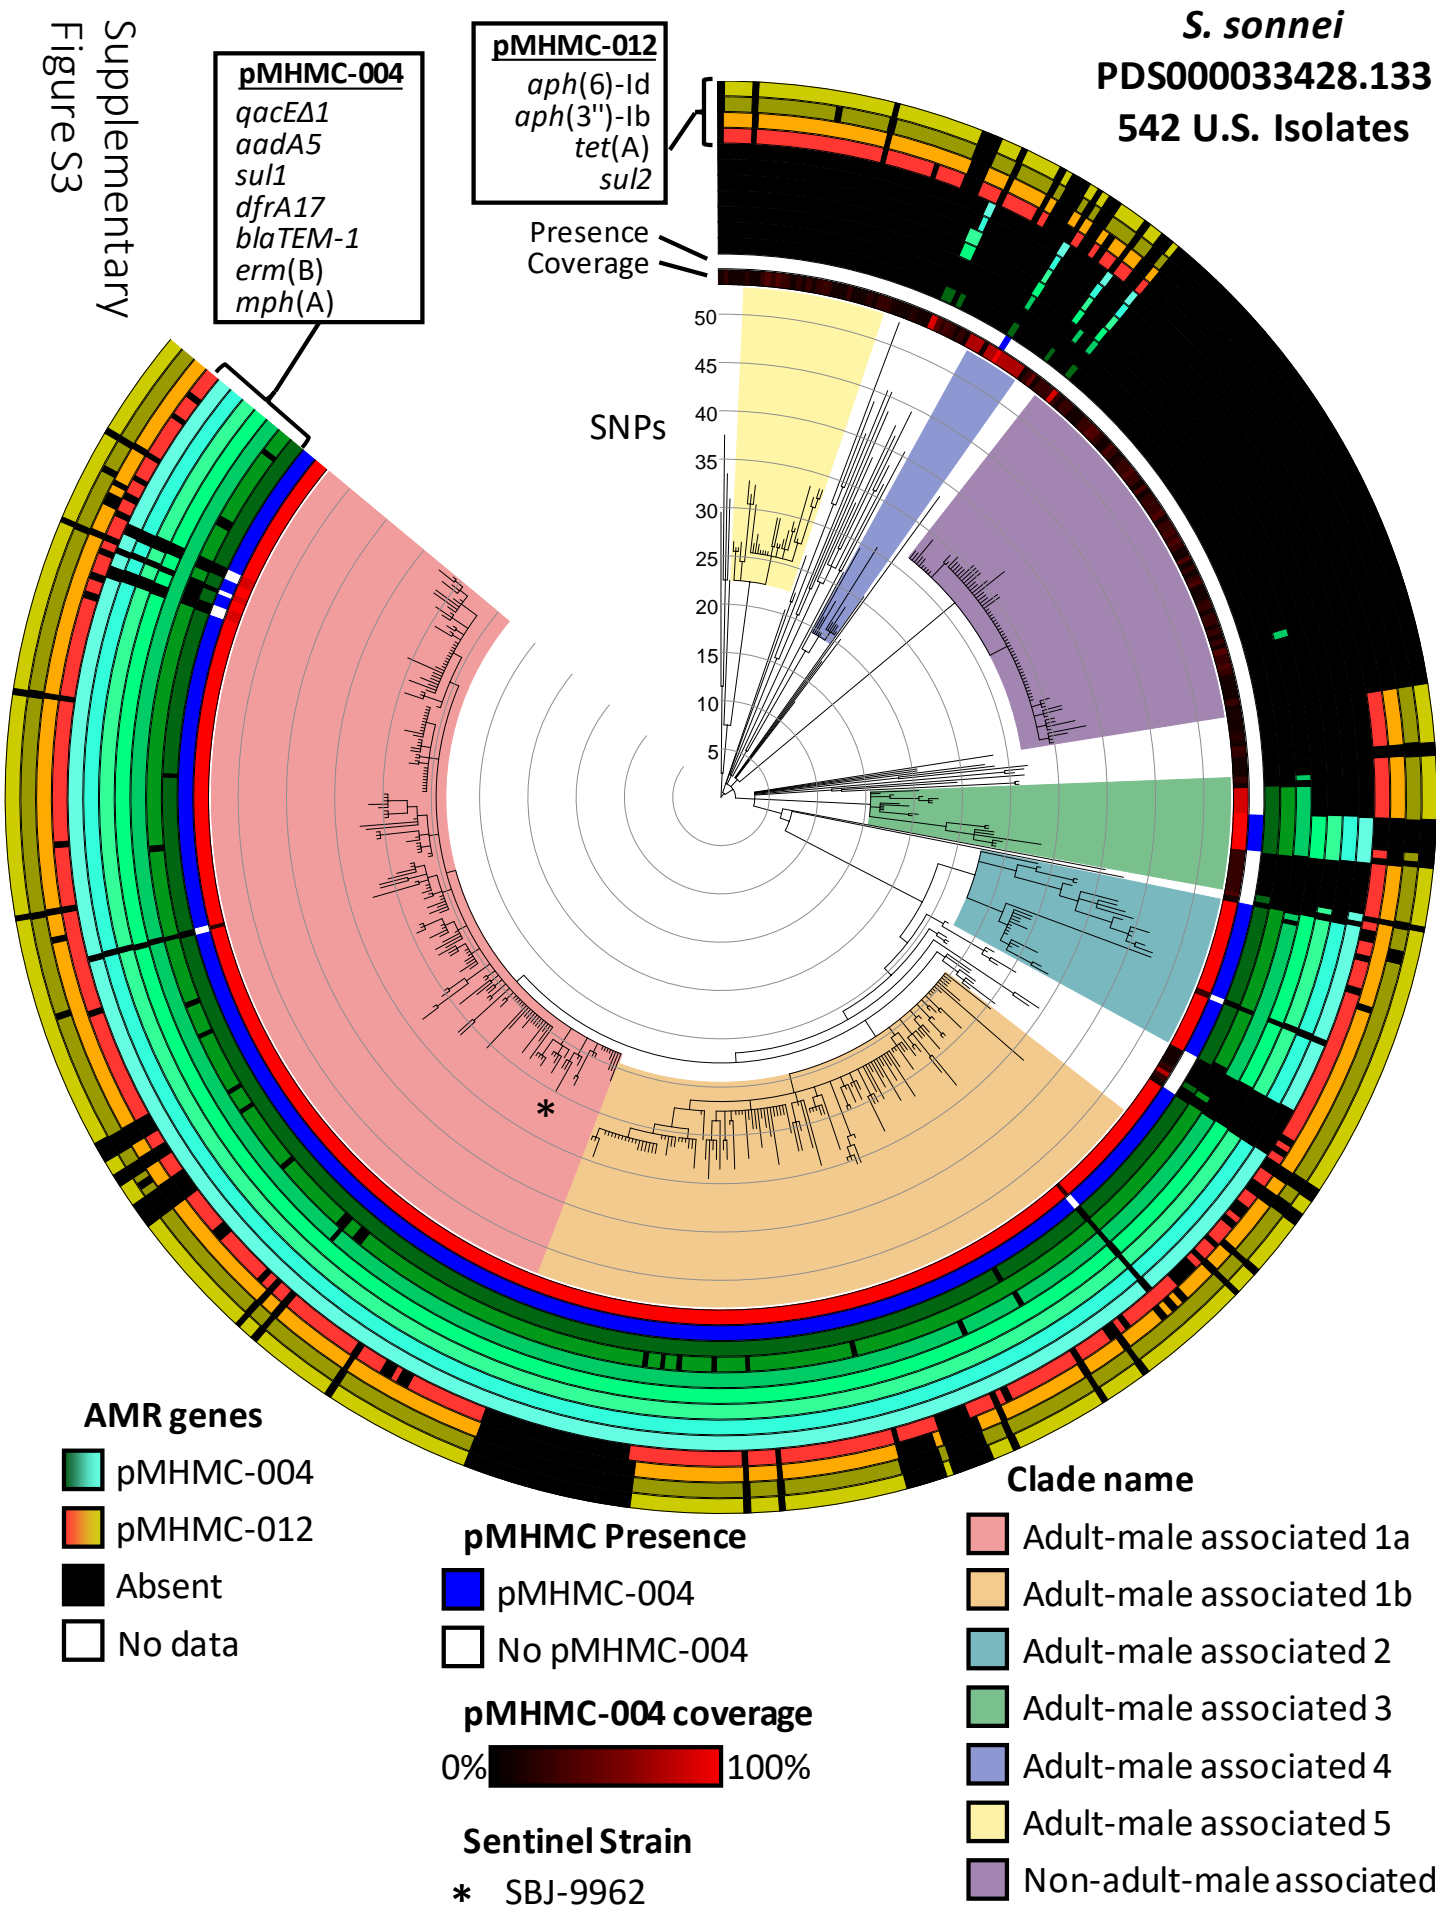

**Supplementary Figure S3: SNP cluster PDS000033428.133 has highly variable AMR gene content driven partially by ISs in family IS6.** The rings, from interior to exterior, represent pMHMC-004 coverage, pMHMC-004 presence, and then in larger groups of rings, pMHMC-004 AMR gene content and pMHMC-012 AMR gene content. Clades of interest within this SNP cluster are color coded directly on the tree and are the same as in Figure 6.
